# Supplementary material for: Global Ischemic Stroke Burden Due to High BMI, 1990–2021: An Age-Period-Cohort Study and Future Risk Prediction Using GBD Data
Source: Research Square preprint supplement (doi:10.21203/rs.3.rs-7557435/v1), 2025-09-23
Supplement: Supplementary file 1 [file 636620719c1a99631f0c97d4.xlsx]

## Sheet: Sheet1
							1990	2021
measure_name	location_name	cause_name	rei_name	metric_name	age_name	sex_name	val_95UI	val_95UI	PC	EAPC_CI
DALYs (Disability-Adjusted Life Years)	Afghanistan	Ischemic stroke	High body-mass index	Rate	Age-standardized	Both	108.632 (14.188, 214.516)	147.56 (22.826, 316.968)	0.358 (-0.004, 0.909)	0.836 (0.705, 0.967)
DALYs (Disability-Adjusted Life Years)	Albania	Ischemic stroke	High body-mass index	Rate	Age-standardized	Both	59.512 (8.774, 121.682)	54.52 (7.733, 115.006)	-0.084 (-0.316, 0.23)	-0.011 (-0.214, 0.192)
DALYs (Disability-Adjusted Life Years)	Algeria	Ischemic stroke	High body-mass index	Rate	Age-standardized	Both	82.399 (11.702, 169.642)	111.468 (17.886, 224.204)	0.353 (0.032, 0.805)	0.873 (0.828, 0.918)
DALYs (Disability-Adjusted Life Years)	American Samoa	Ischemic stroke	High body-mass index	Rate	Age-standardized	Both	93.221 (15.235, 170.551)	93.901 (16.138, 169.072)	0.007 (-0.161, 0.221)	-0.24 (-0.37, -0.109)
DALYs (Disability-Adjusted Life Years)	Andorra	Ischemic stroke	High body-mass index	Rate	Age-standardized	Both	23.685 (3.553, 49.429)	15.419 (2.344, 30.849)	-0.349 (-0.53, -0.128)	-1.293 (-1.494, -1.092)
DALYs (Disability-Adjusted Life Years)	Angola	Ischemic stroke	High body-mass index	Rate	Age-standardized	Both	18.767 (2.351, 37.416)	40.142 (5.42, 79.576)	1.139 (0.5, 1.933)	2.201 (2.079, 2.324)
DALYs (Disability-Adjusted Life Years)	Antigua and Barbuda	Ischemic stroke	High body-mass index	Rate	Age-standardized	Both	45.341 (6.846, 89.646)	44.135 (6.78, 88.139)	-0.027 (-0.163, 0.134)	-0.267 (-0.459, -0.074)
DALYs (Disability-Adjusted Life Years)	Argentina	Ischemic stroke	High body-mass index	Rate	Age-standardized	Both	60.69 (8.816, 118.956)	36.146 (5.351, 72.532)	-0.404 (-0.482, -0.315)	-1.5 (-1.651, -1.348)
DALYs (Disability-Adjusted Life Years)	Armenia	Ischemic stroke	High body-mass index	Rate	Age-standardized	Both	112.488 (16.983, 224.473)	89.298 (14.188, 175.866)	-0.206 (-0.307, -0.091)	-1.634 (-1.943, -1.324)
DALYs (Disability-Adjusted Life Years)	Australia	Ischemic stroke	High body-mass index	Rate	Age-standardized	Both	38.05 (5.366, 75.016)	21.771 (3.23, 43.359)	-0.428 (-0.517, -0.33)	-2.042 (-2.179, -1.905)
DALYs (Disability-Adjusted Life Years)	Austria	Ischemic stroke	High body-mass index	Rate	Age-standardized	Both	53.396 (7.449, 108.157)	20.156 (2.793, 41.073)	-0.623 (-0.681, -0.555)	-3.354 (-3.674, -3.032)
DALYs (Disability-Adjusted Life Years)	Azerbaijan	Ischemic stroke	High body-mass index	Rate	Age-standardized	Both	74.409 (10.267, 152.615)	73.529 (11.156, 149.543)	-0.012 (-0.27, 0.358)	-0.138 (-0.41, 0.134)
DALYs (Disability-Adjusted Life Years)	Bahamas	Ischemic stroke	High body-mass index	Rate	Age-standardized	Both	47.364 (7.256, 92.648)	47.478 (7.071, 89.906)	0.002 (-0.211, 0.265)	0.029 (-0.066, 0.123)
DALYs (Disability-Adjusted Life Years)	Bahrain	Ischemic stroke	High body-mass index	Rate	Age-standardized	Both	101.879 (14.788, 198.752)	96.21 (16.308, 193.147)	-0.056 (-0.238, 0.196)	-0.844 (-1.178, -0.509)
DALYs (Disability-Adjusted Life Years)	Bangladesh	Ischemic stroke	High body-mass index	Rate	Age-standardized	Both	8.382 (0.99, 17.704)	20.802 (2.801, 44.181)	1.482 (0.755, 2.494)	3.455 (3.296, 3.614)
DALYs (Disability-Adjusted Life Years)	Barbados	Ischemic stroke	High body-mass index	Rate	Age-standardized	Both	62.425 (9.128, 120.965)	60.741 (9.68, 121.739)	-0.027 (-0.244, 0.253)	-0.236 (-0.379, -0.093)
DALYs (Disability-Adjusted Life Years)	Belarus	Ischemic stroke	High body-mass index	Rate	Age-standardized	Both	152.042 (21.985, 301.009)	145.026 (21.268, 278.685)	-0.046 (-0.202, 0.15)	-0.979 (-1.495, -0.46)
DALYs (Disability-Adjusted Life Years)	Belgium	Ischemic stroke	High body-mass index	Rate	Age-standardized	Both	37.409 (5.38, 72.37)	18.49 (2.639, 36.959)	-0.506 (-0.576, -0.425)	-2.282 (-2.427, -2.137)
DALYs (Disability-Adjusted Life Years)	Belize	Ischemic stroke	High body-mass index	Rate	Age-standardized	Both	35.744 (5.319, 71.495)	43.813 (7.171, 84.189)	0.226 (0.019, 0.471)	0.35 (-0.146, 0.849)
DALYs (Disability-Adjusted Life Years)	Benin	Ischemic stroke	High body-mass index	Rate	Age-standardized	Both	47.601 (6.149, 94.788)	66.191 (9.28, 134.786)	0.391 (0.056, 0.88)	1.039 (0.894, 1.184)
DALYs (Disability-Adjusted Life Years)	Bermuda	Ischemic stroke	High body-mass index	Rate	Age-standardized	Both	56.035 (8.281, 113.804)	35.089 (5.827, 68.69)	-0.374 (-0.49, -0.203)	-1.569 (-1.804, -1.333)
DALYs (Disability-Adjusted Life Years)	Bhutan	Ischemic stroke	High body-mass index	Rate	Age-standardized	Both	27.315 (3.925, 55.343)	33.568 (5.065, 72.124)	0.229 (-0.135, 0.745)	0.635 (0.574, 0.696)
DALYs (Disability-Adjusted Life Years)	Bolivia (Plurinational State of)	Ischemic stroke	High body-mass index	Rate	Age-standardized	Both	37.466 (5.078, 77.572)	35.233 (5.002, 74.907)	-0.06 (-0.318, 0.332)	-0.287 (-0.414, -0.159)
DALYs (Disability-Adjusted Life Years)	Bosnia and Herzegovina	Ischemic stroke	High body-mass index	Rate	Age-standardized	Both	145.387 (20.806, 301.776)	132.085 (20.027, 267.887)	-0.091 (-0.301, 0.174)	-0.681 (-0.814, -0.547)
DALYs (Disability-Adjusted Life Years)	Botswana	Ischemic stroke	High body-mass index	Rate	Age-standardized	Both	51.582 (6.565, 102.229)	78.488 (10.555, 152.364)	0.522 (0.083, 1.217)	1.596 (1.314, 1.879)
DALYs (Disability-Adjusted Life Years)	Brazil	Ischemic stroke	High body-mass index	Rate	Age-standardized	Both	75.108 (10.985, 148.725)	44.417 (6.5, 87.954)	-0.409 (-0.466, -0.334)	-1.825 (-1.993, -1.656)
DALYs (Disability-Adjusted Life Years)	Brunei Darussalam	Ischemic stroke	High body-mass index	Rate	Age-standardized	Both	32.429 (4.441, 61.362)	31.593 (4.556, 60.211)	-0.026 (-0.246, 0.264)	-0.155 (-0.255, -0.056)
DALYs (Disability-Adjusted Life Years)	Bulgaria	Ischemic stroke	High body-mass index	Rate	Age-standardized	Both	205.916 (30.065, 405.102)	218.215 (33.392, 437.618)	0.06 (-0.092, 0.251)	0.28 (0.127, 0.432)
DALYs (Disability-Adjusted Life Years)	Burkina Faso	Ischemic stroke	High body-mass index	Rate	Age-standardized	Both	10.976 (1.53, 22.139)	17.263 (2.171, 36.129)	0.573 (0.116, 1.261)	1.623 (1.541, 1.704)
DALYs (Disability-Adjusted Life Years)	Burundi	Ischemic stroke	High body-mass index	Rate	Age-standardized	Both	17.727 (1.98, 37.588)	16.442 (2.064, 32.876)	-0.073 (-0.373, 0.323)	-0.931 (-1.247, -0.615)
DALYs (Disability-Adjusted Life Years)	Cabo Verde	Ischemic stroke	High body-mass index	Rate	Age-standardized	Both	29.978 (3.87, 58.236)	68.053 (10.732, 132.415)	1.27 (0.709, 2.08)	2.487 (2.264, 2.709)
DALYs (Disability-Adjusted Life Years)	Cambodia	Ischemic stroke	High body-mass index	Rate	Age-standardized	Both	12.877 (1.668, 24.99)	19.869 (2.914, 38.685)	0.543 (0.088, 1.14)	1.264 (1.135, 1.392)
DALYs (Disability-Adjusted Life Years)	Cameroon	Ischemic stroke	High body-mass index	Rate	Age-standardized	Both	56.666 (7.117, 114.346)	110.356 (16.202, 223.416)	0.947 (0.427, 1.801)	2.24 (1.789, 2.693)
DALYs (Disability-Adjusted Life Years)	Canada	Ischemic stroke	High body-mass index	Rate	Age-standardized	Both	36.817 (5.352, 73.556)	24.682 (3.631, 48.779)	-0.33 (-0.42, -0.234)	-1.628 (-1.803, -1.453)
DALYs (Disability-Adjusted Life Years)	Central African Republic	Ischemic stroke	High body-mass index	Rate	Age-standardized	Both	20.281 (2.387, 40.829)	39.425 (5.066, 86.363)	0.944 (0.378, 1.674)	2.09 (2.039, 2.141)
DALYs (Disability-Adjusted Life Years)	Chad	Ischemic stroke	High body-mass index	Rate	Age-standardized	Both	27.168 (3.407, 56.554)	44.761 (5.775, 93.706)	0.648 (0.182, 1.289)	1.558 (1.432, 1.685)
DALYs (Disability-Adjusted Life Years)	Chile	Ischemic stroke	High body-mass index	Rate	Age-standardized	Both	69.367 (10.067, 138.157)	39.096 (5.744, 76.337)	-0.436 (-0.497, -0.365)	-1.587 (-1.719, -1.455)
DALYs (Disability-Adjusted Life Years)	China	Ischemic stroke	High body-mass index	Rate	Age-standardized	Both	24.608 (3.088, 50.088)	56.21 (7.843, 113)	1.284 (0.823, 1.939)	2.792 (2.661, 2.923)
DALYs (Disability-Adjusted Life Years)	Colombia	Ischemic stroke	High body-mass index	Rate	Age-standardized	Both	35.75 (5.153, 69.529)	23.251 (3.5, 47.182)	-0.35 (-0.459, -0.213)	-1.929 (-2.271, -1.586)
DALYs (Disability-Adjusted Life Years)	Comoros	Ischemic stroke	High body-mass index	Rate	Age-standardized	Both	24.951 (3.023, 50.884)	42.012 (5.872, 82.4)	0.684 (0.228, 1.347)	1.434 (1.25, 1.618)
DALYs (Disability-Adjusted Life Years)	Congo	Ischemic stroke	High body-mass index	Rate	Age-standardized	Both	36.355 (4.117, 74.004)	68.922 (9.114, 137.39)	0.896 (0.393, 1.555)	1.737 (1.559, 1.915)
DALYs (Disability-Adjusted Life Years)	Cook Islands	Ischemic stroke	High body-mass index	Rate	Age-standardized	Both	84.069 (12.57, 159.879)	69.825 (11.726, 133.809)	-0.169 (-0.327, 0.045)	-0.622 (-0.773, -0.471)
DALYs (Disability-Adjusted Life Years)	Costa Rica	Ischemic stroke	High body-mass index	Rate	Age-standardized	Both	26.503 (3.842, 52.568)	23.105 (3.616, 45.788)	-0.128 (-0.249, 0.01)	-0.896 (-1.203, -0.587)
DALYs (Disability-Adjusted Life Years)	Cote d'Ivoire	Ischemic stroke	High body-mass index	Rate	Age-standardized	Both	50.211 (6.403, 96.718)	81.256 (10.881, 160.564)	0.618 (0.177, 1.237)	1.478 (1.287, 1.67)
DALYs (Disability-Adjusted Life Years)	Croatia	Ischemic stroke	High body-mass index	Rate	Age-standardized	Both	142.83 (20.305, 287.005)	68.518 (10.35, 140.546)	-0.52 (-0.586, -0.441)	-2.544 (-2.687, -2.401)
DALYs (Disability-Adjusted Life Years)	Cuba	Ischemic stroke	High body-mass index	Rate	Age-standardized	Both	32.167 (4.923, 60.125)	44.58 (6.641, 86.639)	0.386 (0.119, 0.685)	1.224 (1.119, 1.329)
DALYs (Disability-Adjusted Life Years)	Cyprus	Ischemic stroke	High body-mass index	Rate	Age-standardized	Both	42.753 (5.972, 86.047)	22.641 (3.45, 47.626)	-0.47 (-0.618, -0.257)	-2.478 (-2.659, -2.297)
DALYs (Disability-Adjusted Life Years)	Czechia	Ischemic stroke	High body-mass index	Rate	Age-standardized	Both	213.199 (32.067, 426.916)	54.286 (8.242, 109.426)	-0.745 (-0.779, -0.708)	-4.669 (-4.885, -4.452)
DALYs (Disability-Adjusted Life Years)	Democratic People's Republic of Korea	Ischemic stroke	High body-mass index	Rate	Age-standardized	Both	17.799 (2.21, 38.562)	43.076 (5.492, 97.886)	1.42 (0.768, 2.392)	2.823 (2.781, 2.865)
DALYs (Disability-Adjusted Life Years)	Democratic Republic of the Congo	Ischemic stroke	High body-mass index	Rate	Age-standardized	Both	20.238 (2.289, 41.807)	44.569 (5.741, 94.694)	1.202 (0.583, 1.998)	2.48 (2.396, 2.565)
DALYs (Disability-Adjusted Life Years)	Denmark	Ischemic stroke	High body-mass index	Rate	Age-standardized	Both	38.219 (5.455, 74.399)	18.959 (2.731, 38.235)	-0.504 (-0.566, -0.434)	-2.589 (-2.752, -2.425)
DALYs (Disability-Adjusted Life Years)	Djibouti	Ischemic stroke	High body-mass index	Rate	Age-standardized	Both	10.089 (1.141, 21.779)	18.566 (2.271, 37.254)	0.84 (0.232, 1.635)	1.819 (1.753, 1.886)
DALYs (Disability-Adjusted Life Years)	Dominica	Ischemic stroke	High body-mass index	Rate	Age-standardized	Both	74.65 (10.724, 145.618)	86.54 (13.722, 169.655)	0.159 (-0.055, 0.433)	0.448 (0.345, 0.551)
DALYs (Disability-Adjusted Life Years)	Dominican Republic	Ischemic stroke	High body-mass index	Rate	Age-standardized	Both	26.475 (3.607, 52.806)	48.188 (7.506, 95.3)	0.82 (0.351, 1.467)	2.149 (1.998, 2.301)
DALYs (Disability-Adjusted Life Years)	Ecuador	Ischemic stroke	High body-mass index	Rate	Age-standardized	Both	39.73 (5.86, 78.492)	31.312 (4.669, 60.239)	-0.212 (-0.389, 0.016)	-0.652 (-0.958, -0.346)
DALYs (Disability-Adjusted Life Years)	Egypt	Ischemic stroke	High body-mass index	Rate	Age-standardized	Both	251.917 (38.5, 532.358)	346.945 (59.755, 665.416)	0.377 (0.039, 0.863)	1.377 (1.224, 1.53)
DALYs (Disability-Adjusted Life Years)	El Salvador	Ischemic stroke	High body-mass index	Rate	Age-standardized	Both	33.739 (4.85, 65.864)	30.109 (4.51, 59.667)	-0.108 (-0.302, 0.133)	-0.622 (-0.945, -0.297)
DALYs (Disability-Adjusted Life Years)	Equatorial Guinea	Ischemic stroke	High body-mass index	Rate	Age-standardized	Both	38.641 (5.201, 79.67)	70.077 (9.481, 137.269)	0.814 (0.192, 1.764)	1.644 (1.424, 1.865)
DALYs (Disability-Adjusted Life Years)	Eritrea	Ischemic stroke	High body-mass index	Rate	Age-standardized	Both	10.737 (1.163, 22.669)	17.798 (2.401, 37.408)	0.658 (0.146, 1.424)	1.635 (1.481, 1.79)
DALYs (Disability-Adjusted Life Years)	Estonia	Ischemic stroke	High body-mass index	Rate	Age-standardized	Both	193.541 (28.732, 372.219)	52.58 (7.445, 102.969)	-0.728 (-0.766, -0.686)	-5.529 (-6.021, -5.034)
DALYs (Disability-Adjusted Life Years)	Eswatini	Ischemic stroke	High body-mass index	Rate	Age-standardized	Both	88.874 (11.699, 171.689)	156.349 (20.794, 317.172)	0.759 (0.244, 1.479)	2.219 (1.744, 2.695)
DALYs (Disability-Adjusted Life Years)	Ethiopia	Ischemic stroke	High body-mass index	Rate	Age-standardized	Both	9.367 (0.988, 19.358)	10.721 (1.361, 20.989)	0.145 (-0.265, 0.646)	0.046 (-0.117, 0.209)
DALYs (Disability-Adjusted Life Years)	Fiji	Ischemic stroke	High body-mass index	Rate	Age-standardized	Both	77.724 (11.098, 159.112)	99.413 (16.294, 190.528)	0.279 (0.005, 0.692)	0.547 (0.413, 0.682)
DALYs (Disability-Adjusted Life Years)	Finland	Ischemic stroke	High body-mass index	Rate	Age-standardized	Both	59.981 (8.568, 120.261)	26.713 (3.836, 52.687)	-0.555 (-0.615, -0.493)	-2.657 (-2.747, -2.567)
DALYs (Disability-Adjusted Life Years)	France	Ischemic stroke	High body-mass index	Rate	Age-standardized	Both	25.336 (3.615, 49.237)	16.775 (2.411, 32.771)	-0.338 (-0.442, -0.215)	-1.255 (-1.328, -1.181)
DALYs (Disability-Adjusted Life Years)	Gabon	Ischemic stroke	High body-mass index	Rate	Age-standardized	Both	52.87 (6.72, 98.871)	84.993 (12.36, 160.979)	0.608 (0.22, 1.102)	1.362 (1.177, 1.547)
DALYs (Disability-Adjusted Life Years)	Gambia	Ischemic stroke	High body-mass index	Rate	Age-standardized	Both	50.966 (6.546, 99.444)	86.917 (11.573, 174.782)	0.705 (0.247, 1.43)	1.618 (1.465, 1.771)
DALYs (Disability-Adjusted Life Years)	Georgia	Ischemic stroke	High body-mass index	Rate	Age-standardized	Both	92.82 (13.671, 187.887)	130.413 (18.7, 256.15)	0.405 (0.139, 0.779)	1.023 (0.643, 1.403)
DALYs (Disability-Adjusted Life Years)	Germany	Ischemic stroke	High body-mass index	Rate	Age-standardized	Both	68.303 (9.713, 132.696)	29.334 (4.132, 58.218)	-0.571 (-0.617, -0.514)	-2.821 (-3.063, -2.579)
DALYs (Disability-Adjusted Life Years)	Ghana	Ischemic stroke	High body-mass index	Rate	Age-standardized	Both	46.284 (5.825, 89.771)	110.484 (14.843, 213.796)	1.387 (0.7, 2.363)	3.005 (2.836, 3.174)
DALYs (Disability-Adjusted Life Years)	Greece	Ischemic stroke	High body-mass index	Rate	Age-standardized	Both	62.541 (8.738, 127.458)	31.515 (4.632, 64.244)	-0.496 (-0.601, -0.41)	-2.841 (-3.098, -2.584)
DALYs (Disability-Adjusted Life Years)	Greenland	Ischemic stroke	High body-mass index	Rate	Age-standardized	Both	117.029 (16.805, 237.224)	49.139 (7.692, 100.53)	-0.58 (-0.657, -0.478)	-3.047 (-3.188, -2.906)
DALYs (Disability-Adjusted Life Years)	Grenada	Ischemic stroke	High body-mass index	Rate	Age-standardized	Both	81.861 (11.929, 161.006)	57.391 (7.982, 112.883)	-0.299 (-0.442, -0.149)	-0.892 (-1.114, -0.669)
DALYs (Disability-Adjusted Life Years)	Guam	Ischemic stroke	High body-mass index	Rate	Age-standardized	Both	62.677 (9.251, 122.594)	51.221 (8.173, 98.95)	-0.183 (-0.31, -0.018)	-0.602 (-0.817, -0.387)
DALYs (Disability-Adjusted Life Years)	Guatemala	Ischemic stroke	High body-mass index	Rate	Age-standardized	Both	30.464 (4.706, 57.815)	25.296 (3.829, 50.546)	-0.17 (-0.312, 0.015)	-1.077 (-1.37, -0.783)
DALYs (Disability-Adjusted Life Years)	Guinea	Ischemic stroke	High body-mass index	Rate	Age-standardized	Both	31.612 (3.905, 61.845)	55.961 (7.549, 111.018)	0.77 (0.262, 1.551)	2.143 (2.051, 2.236)
DALYs (Disability-Adjusted Life Years)	Guinea-Bissau	Ischemic stroke	High body-mass index	Rate	Age-standardized	Both	49.38 (6.527, 100.225)	84.388 (12.053, 165.116)	0.709 (0.221, 1.382)	1.859 (1.817, 1.901)
DALYs (Disability-Adjusted Life Years)	Guyana	Ischemic stroke	High body-mass index	Rate	Age-standardized	Both	106.487 (14.901, 209.678)	88.206 (13.404, 174.826)	-0.172 (-0.366, 0.068)	-0.011 (-0.222, 0.2)
DALYs (Disability-Adjusted Life Years)	Haiti	Ischemic stroke	High body-mass index	Rate	Age-standardized	Both	29.381 (3.682, 59.925)	44.483 (5.613, 92.545)	0.514 (0.039, 1.195)	1.647 (1.524, 1.77)
DALYs (Disability-Adjusted Life Years)	Honduras	Ischemic stroke	High body-mass index	Rate	Age-standardized	Both	39.876 (5.36, 82.158)	65.885 (9.482, 136.513)	0.652 (0.265, 1.143)	1.783 (1.624, 1.941)
DALYs (Disability-Adjusted Life Years)	Hungary	Ischemic stroke	High body-mass index	Rate	Age-standardized	Both	211.384 (32.415, 409.296)	89.482 (13.592, 170.148)	-0.577 (-0.638, -0.508)	-3.192 (-3.376, -3.008)
DALYs (Disability-Adjusted Life Years)	Iceland	Ischemic stroke	High body-mass index	Rate	Age-standardized	Both	42.025 (6.192, 83.382)	18.274 (2.591, 36.965)	-0.565 (-0.621, -0.506)	-2.82 (-2.928, -2.712)
DALYs (Disability-Adjusted Life Years)	India	Ischemic stroke	High body-mass index	Rate	Age-standardized	Both	7.65 (0.841, 15.177)	17.01 (2.056, 32.92)	1.223 (0.8, 1.814)	2.596 (2.53, 2.661)
DALYs (Disability-Adjusted Life Years)	Indonesia	Ischemic stroke	High body-mass index	Rate	Age-standardized	Both	15.326 (1.92, 30.388)	44.899 (5.968, 87.885)	1.93 (1.217, 2.805)	3.762 (3.515, 4.01)
DALYs (Disability-Adjusted Life Years)	Iran (Islamic Republic of)	Ischemic stroke	High body-mass index	Rate	Age-standardized	Both	93.138 (13.694, 176.807)	99.592 (15.683, 189.526)	0.069 (-0.139, 0.325)	0.014 (-0.123, 0.15)
DALYs (Disability-Adjusted Life Years)	Iraq	Ischemic stroke	High body-mass index	Rate	Age-standardized	Both	240.558 (35.669, 470.045)	240.409 (38.756, 480.479)	-0.001 (-0.259, 0.323)	-0.494 (-0.634, -0.353)
DALYs (Disability-Adjusted Life Years)	Ireland	Ischemic stroke	High body-mass index	Rate	Age-standardized	Both	46.247 (6.703, 91.877)	15.696 (2.235, 32.181)	-0.661 (-0.713, -0.595)	-3.75 (-3.958, -3.542)
DALYs (Disability-Adjusted Life Years)	Israel	Ischemic stroke	High body-mass index	Rate	Age-standardized	Both	36.261 (5.319, 72.165)	16.299 (2.372, 32.991)	-0.551 (-0.608, -0.486)	-3.081 (-3.253, -2.909)
DALYs (Disability-Adjusted Life Years)	Italy	Ischemic stroke	High body-mass index	Rate	Age-standardized	Both	40.659 (5.861, 80.735)	17.314 (2.448, 35.73)	-0.574 (-0.632, -0.509)	-3.091 (-3.381, -2.801)
DALYs (Disability-Adjusted Life Years)	Jamaica	Ischemic stroke	High body-mass index	Rate	Age-standardized	Both	54.705 (7.829, 103.853)	60.791 (9.721, 119.375)	0.111 (-0.163, 0.501)	0.623 (0.259, 0.988)
DALYs (Disability-Adjusted Life Years)	Japan	Ischemic stroke	High body-mass index	Rate	Age-standardized	Both	17.255 (2.307, 33.159)	10.257 (1.369, 19.538)	-0.406 (-0.482, -0.322)	-1.997 (-2.156, -1.838)
DALYs (Disability-Adjusted Life Years)	Jordan	Ischemic stroke	High body-mass index	Rate	Age-standardized	Both	203.07 (31.001, 391.884)	141.666 (23.556, 278)	-0.302 (-0.452, -0.071)	-1.762 (-2.129, -1.394)
DALYs (Disability-Adjusted Life Years)	Kazakhstan	Ischemic stroke	High body-mass index	Rate	Age-standardized	Both	173.925 (26.143, 346.271)	160.268 (23.601, 321.497)	-0.079 (-0.236, 0.115)	-0.991 (-1.56, -0.418)
DALYs (Disability-Adjusted Life Years)	Kenya	Ischemic stroke	High body-mass index	Rate	Age-standardized	Both	13.556 (1.695, 25.983)	30.598 (3.964, 58.337)	1.257 (0.827, 1.882)	2.846 (2.746, 2.946)
DALYs (Disability-Adjusted Life Years)	Kiribati	Ischemic stroke	High body-mass index	Rate	Age-standardized	Both	84.506 (13.389, 165.42)	123.423 (20.488, 236.267)	0.461 (0.163, 0.907)	1.186 (1.124, 1.248)
DALYs (Disability-Adjusted Life Years)	Kuwait	Ischemic stroke	High body-mass index	Rate	Age-standardized	Both	73.144 (11.131, 138.212)	81.225 (13.147, 153.443)	0.11 (-0.078, 0.348)	0.578 (-0.251, 1.413)
DALYs (Disability-Adjusted Life Years)	Kyrgyzstan	Ischemic stroke	High body-mass index	Rate	Age-standardized	Both	162.396 (24.643, 311.987)	140.904 (23.083, 274.034)	-0.132 (-0.259, 0.05)	-1.16 (-1.585, -0.733)
DALYs (Disability-Adjusted Life Years)	Lao People's Democratic Republic	Ischemic stroke	High body-mass index	Rate	Age-standardized	Both	24.923 (3.251, 50.671)	37.101 (4.796, 74.766)	0.489 (0.001, 1.179)	1.37 (1.31, 1.43)
DALYs (Disability-Adjusted Life Years)	Latvia	Ischemic stroke	High body-mass index	Rate	Age-standardized	Both	206.963 (31.853, 413.072)	141.32 (20.706, 280.759)	-0.317 (-0.4, -0.228)	-1.749 (-2.005, -1.492)
DALYs (Disability-Adjusted Life Years)	Lebanon	Ischemic stroke	High body-mass index	Rate	Age-standardized	Both	104.649 (14.127, 216.556)	64.025 (10.291, 122.228)	-0.388 (-0.558, -0.176)	-1.731 (-2.06, -1.401)
DALYs (Disability-Adjusted Life Years)	Lesotho	Ischemic stroke	High body-mass index	Rate	Age-standardized	Both	48.912 (7.254, 101.528)	123.904 (19.01, 249.76)	1.533 (0.771, 2.699)	3.983 (3.463, 4.506)
DALYs (Disability-Adjusted Life Years)	Liberia	Ischemic stroke	High body-mass index	Rate	Age-standardized	Both	63.985 (8.474, 127.596)	101.996 (14.848, 200.475)	0.594 (0.182, 1.169)	1.43 (1.331, 1.53)
DALYs (Disability-Adjusted Life Years)	Libya	Ischemic stroke	High body-mass index	Rate	Age-standardized	Both	74.335 (11.221, 149.957)	163.886 (26.491, 309.349)	1.205 (0.684, 1.981)	2.909 (2.735, 3.085)
DALYs (Disability-Adjusted Life Years)	Lithuania	Ischemic stroke	High body-mass index	Rate	Age-standardized	Both	118.299 (17.989, 236.164)	99.056 (14.352, 198.092)	-0.163 (-0.283, -0.048)	-0.505 (-0.846, -0.162)
DALYs (Disability-Adjusted Life Years)	Luxembourg	Ischemic stroke	High body-mass index	Rate	Age-standardized	Both	68.836 (9.469, 133.972)	17.692 (2.652, 35.718)	-0.743 (-0.78, -0.701)	-4.502 (-4.641, -4.363)
DALYs (Disability-Adjusted Life Years)	Madagascar	Ischemic stroke	High body-mass index	Rate	Age-standardized	Both	19.922 (2.549, 39.134)	39.557 (5.437, 79.788)	0.986 (0.355, 1.777)	2.106 (2.007, 2.205)
DALYs (Disability-Adjusted Life Years)	Malawi	Ischemic stroke	High body-mass index	Rate	Age-standardized	Both	15.513 (1.749, 29.801)	37.997 (4.835, 74.296)	1.449 (0.815, 2.318)	2.646 (2.443, 2.849)
DALYs (Disability-Adjusted Life Years)	Malaysia	Ischemic stroke	High body-mass index	Rate	Age-standardized	Both	38.671 (5.54, 72.828)	52.264 (7.329, 99.349)	0.352 (0.1, 0.652)	1.112 (1.01, 1.214)
DALYs (Disability-Adjusted Life Years)	Maldives	Ischemic stroke	High body-mass index	Rate	Age-standardized	Both	34.477 (4.343, 66.899)	27.924 (3.96, 54.093)	-0.19 (-0.397, 0.097)	-1.045 (-1.189, -0.901)
DALYs (Disability-Adjusted Life Years)	Mali	Ischemic stroke	High body-mass index	Rate	Age-standardized	Both	24.134 (2.939, 50.494)	30.123 (3.994, 60.057)	0.248 (-0.077, 0.719)	0.776 (0.588, 0.963)
DALYs (Disability-Adjusted Life Years)	Malta	Ischemic stroke	High body-mass index	Rate	Age-standardized	Both	40.232 (5.598, 76.794)	16.259 (2.387, 33.193)	-0.596 (-0.667, -0.512)	-3.178 (-3.396, -2.96)
DALYs (Disability-Adjusted Life Years)	Marshall Islands	Ischemic stroke	High body-mass index	Rate	Age-standardized	Both	98.628 (14.328, 205.274)	120.283 (18.434, 239.426)	0.22 (-0.038, 0.523)	0.55 (0.482, 0.618)
DALYs (Disability-Adjusted Life Years)	Mauritania	Ischemic stroke	High body-mass index	Rate	Age-standardized	Both	91.577 (12.418, 186.514)	106.279 (14.678, 220.4)	0.161 (-0.117, 0.558)	0.286 (0.137, 0.434)
DALYs (Disability-Adjusted Life Years)	Mauritius	Ischemic stroke	High body-mass index	Rate	Age-standardized	Both	80.312 (11.107, 153.899)	49.864 (7.303, 95.36)	-0.379 (-0.492, -0.232)	-2.622 (-3.121, -2.121)
DALYs (Disability-Adjusted Life Years)	Mexico	Ischemic stroke	High body-mass index	Rate	Age-standardized	Both	44.122 (6.541, 85.632)	33.615 (5.463, 64.111)	-0.238 (-0.331, -0.131)	-1.07 (-1.232, -0.908)
DALYs (Disability-Adjusted Life Years)	Micronesia (Federated States of)	Ischemic stroke	High body-mass index	Rate	Age-standardized	Both	110.395 (17.445, 212.216)	130.034 (20.3, 248.059)	0.178 (-0.088, 0.533)	0.467 (0.419, 0.515)
DALYs (Disability-Adjusted Life Years)	Monaco	Ischemic stroke	High body-mass index	Rate	Age-standardized	Both	72.515 (9.629, 142.314)	38.155 (6.118, 76.408)	-0.474 (-0.588, -0.29)	-2.214 (-2.348, -2.08)
DALYs (Disability-Adjusted Life Years)	Mongolia	Ischemic stroke	High body-mass index	Rate	Age-standardized	Both	35.429 (5.184, 71.6)	43.272 (6.184, 85.832)	0.221 (-0.054, 0.574)	0.613 (0.28, 0.948)
DALYs (Disability-Adjusted Life Years)	Montenegro	Ischemic stroke	High body-mass index	Rate	Age-standardized	Both	54.802 (8.362, 112.109)	88.763 (12.248, 182.937)	0.62 (0.216, 1.131)	1.724 (1.616, 1.833)
DALYs (Disability-Adjusted Life Years)	Morocco	Ischemic stroke	High body-mass index	Rate	Age-standardized	Both	100.822 (13.347, 217.769)	150.637 (22.674, 299.567)	0.494 (0.104, 0.992)	1.405 (1.321, 1.49)
DALYs (Disability-Adjusted Life Years)	Mozambique	Ischemic stroke	High body-mass index	Rate	Age-standardized	Both	20.246 (2.585, 40.775)	56.251 (7.576, 113.623)	1.778 (0.961, 2.773)	3.826 (3.65, 4.002)
DALYs (Disability-Adjusted Life Years)	Myanmar	Ischemic stroke	High body-mass index	Rate	Age-standardized	Both	26.105 (3.528, 50.451)	30.325 (4.18, 59.655)	0.162 (-0.176, 0.632)	0.301 (0.177, 0.425)
DALYs (Disability-Adjusted Life Years)	Namibia	Ischemic stroke	High body-mass index	Rate	Age-standardized	Both	54.338 (7.236, 114.592)	98.977 (14.172, 193.902)	0.821 (0.297, 1.525)	1.739 (1.438, 2.041)
DALYs (Disability-Adjusted Life Years)	Nauru	Ischemic stroke	High body-mass index	Rate	Age-standardized	Both	189.848 (30.636, 341.657)	234.105 (39.548, 433.065)	0.233 (-0.036, 0.645)	0.495 (0.157, 0.835)
DALYs (Disability-Adjusted Life Years)	Nepal	Ischemic stroke	High body-mass index	Rate	Age-standardized	Both	9.555 (1.125, 19.121)	15.798 (1.921, 32.942)	0.653 (0.061, 1.625)	1.743 (1.561, 1.925)
DALYs (Disability-Adjusted Life Years)	Netherlands	Ischemic stroke	High body-mass index	Rate	Age-standardized	Both	36.554 (5.113, 73.729)	21.127 (3.095, 42.59)	-0.422 (-0.496, -0.346)	-2.213 (-2.425, -2)
DALYs (Disability-Adjusted Life Years)	New Zealand	Ischemic stroke	High body-mass index	Rate	Age-standardized	Both	44.382 (6.407, 86.777)	24.458 (3.57, 48.036)	-0.449 (-0.534, -0.377)	-2.052 (-2.243, -1.861)
DALYs (Disability-Adjusted Life Years)	Nicaragua	Ischemic stroke	High body-mass index	Rate	Age-standardized	Both	36.562 (5.495, 70.906)	30.904 (4.977, 61.048)	-0.155 (-0.313, 0.053)	-0.583 (-0.691, -0.476)
DALYs (Disability-Adjusted Life Years)	Niger	Ischemic stroke	High body-mass index	Rate	Age-standardized	Both	22.338 (2.563, 47.63)	26.966 (3.391, 58.332)	0.207 (-0.111, 0.71)	0.611 (0.533, 0.689)
DALYs (Disability-Adjusted Life Years)	Nigeria	Ischemic stroke	High body-mass index	Rate	Age-standardized	Both	38.263 (4.967, 78.188)	62.518 (8.643, 122.058)	0.634 (0.181, 1.403)	1.414 (1.269, 1.56)
DALYs (Disability-Adjusted Life Years)	Niue	Ischemic stroke	High body-mass index	Rate	Age-standardized	Both	88.91 (13.622, 174.686)	105.766 (17.322, 205.656)	0.19 (-0.042, 0.478)	0.32 (0.245, 0.396)
DALYs (Disability-Adjusted Life Years)	North Macedonia	Ischemic stroke	High body-mass index	Rate	Age-standardized	Both	224.415 (33.298, 434.841)	236.513 (34.349, 491.227)	0.054 (-0.181, 0.315)	-0.075 (-0.394, 0.244)
DALYs (Disability-Adjusted Life Years)	Northern Mariana Islands	Ischemic stroke	High body-mass index	Rate	Age-standardized	Both	83.41 (13.102, 160.215)	79.651 (12.608, 151.079)	-0.045 (-0.238, 0.196)	-0.441 (-0.631, -0.251)
DALYs (Disability-Adjusted Life Years)	Norway	Ischemic stroke	High body-mass index	Rate	Age-standardized	Both	42.793 (5.986, 84.106)	16.071 (2.237, 31.471)	-0.624 (-0.67, -0.576)	-3.522 (-3.628, -3.417)
DALYs (Disability-Adjusted Life Years)	Oman	Ischemic stroke	High body-mass index	Rate	Age-standardized	Both	91.162 (12.583, 186.449)	124.775 (21.545, 233.555)	0.369 (-0.017, 0.966)	1.53 (1.334, 1.725)
DALYs (Disability-Adjusted Life Years)	Pakistan	Ischemic stroke	High body-mass index	Rate	Age-standardized	Both	16.445 (1.948, 35.043)	42.654 (5.873, 85.165)	1.594 (0.966, 2.43)	3.246 (3.062, 3.432)
DALYs (Disability-Adjusted Life Years)	Palau	Ischemic stroke	High body-mass index	Rate	Age-standardized	Both	122.989 (18.99, 233.736)	138.444 (21.259, 269.519)	0.126 (-0.1, 0.451)	0.444 (0.388, 0.501)
DALYs (Disability-Adjusted Life Years)	Palestine	Ischemic stroke	High body-mass index	Rate	Age-standardized	Both	183.579 (26.948, 381.207)	167.14 (28.173, 319.639)	-0.09 (-0.28, 0.214)	-0.347 (-0.564, -0.13)
DALYs (Disability-Adjusted Life Years)	Panama	Ischemic stroke	High body-mass index	Rate	Age-standardized	Both	43.592 (6.181, 89.155)	38.424 (6.182, 76.716)	-0.119 (-0.299, 0.086)	-0.58 (-0.749, -0.41)
DALYs (Disability-Adjusted Life Years)	Papua New Guinea	Ischemic stroke	High body-mass index	Rate	Age-standardized	Both	25.363 (3.167, 54.624)	30.521 (4.23, 65.073)	0.203 (-0.115, 0.687)	0.451 (0.325, 0.576)
DALYs (Disability-Adjusted Life Years)	Paraguay	Ischemic stroke	High body-mass index	Rate	Age-standardized	Both	49.221 (7.221, 98.794)	51.038 (7.381, 105.015)	0.037 (-0.204, 0.342)	0.118 (0.009, 0.226)
DALYs (Disability-Adjusted Life Years)	Peru	Ischemic stroke	High body-mass index	Rate	Age-standardized	Both	22.896 (3.41, 48.221)	21.854 (3.351, 43.223)	-0.046 (-0.276, 0.238)	-0.685 (-1.059, -0.31)
DALYs (Disability-Adjusted Life Years)	Philippines	Ischemic stroke	High body-mass index	Rate	Age-standardized	Both	18.243 (2.377, 35.895)	38.105 (4.995, 74.942)	1.089 (0.75, 1.578)	2.54 (2.336, 2.744)
DALYs (Disability-Adjusted Life Years)	Poland	Ischemic stroke	High body-mass index	Rate	Age-standardized	Both	140.119 (20.735, 277.636)	65.367 (9.915, 131.017)	-0.533 (-0.584, -0.477)	-2.827 (-2.935, -2.719)
DALYs (Disability-Adjusted Life Years)	Portugal	Ischemic stroke	High body-mass index	Rate	Age-standardized	Both	95.964 (12.832, 195.104)	26.125 (3.777, 54.785)	-0.728 (-0.77, -0.682)	-4.808 (-5.034, -4.582)
DALYs (Disability-Adjusted Life Years)	Puerto Rico	Ischemic stroke	High body-mass index	Rate	Age-standardized	Both	33.233 (5.081, 66.416)	20.15 (3.245, 38.856)	-0.394 (-0.496, -0.274)	-2.051 (-2.245, -1.857)
DALYs (Disability-Adjusted Life Years)	Qatar	Ischemic stroke	High body-mass index	Rate	Age-standardized	Both	112.313 (18.013, 238.681)	76.491 (12.889, 151.211)	-0.319 (-0.472, -0.099)	-1.604 (-2.153, -1.053)
DALYs (Disability-Adjusted Life Years)	Republic of Korea	Ischemic stroke	High body-mass index	Rate	Age-standardized	Both	32.555 (4.396, 68.112)	15.639 (2.138, 31.015)	-0.52 (-0.643, -0.335)	-3.062 (-3.289, -2.834)
DALYs (Disability-Adjusted Life Years)	Republic of Moldova	Ischemic stroke	High body-mass index	Rate	Age-standardized	Both	104.178 (15.707, 204.064)	123.814 (18.932, 234.049)	0.188 (-0.004, 0.417)	0.767 (0.285, 1.252)
DALYs (Disability-Adjusted Life Years)	Romania	Ischemic stroke	High body-mass index	Rate	Age-standardized	Both	159.278 (23.152, 313.241)	125.207 (17.64, 252.018)	-0.214 (-0.328, -0.075)	-1.427 (-1.739, -1.115)
DALYs (Disability-Adjusted Life Years)	Russian Federation	Ischemic stroke	High body-mass index	Rate	Age-standardized	Both	220.982 (32.4, 427.041)	174.962 (25.753, 341.116)	-0.208 (-0.332, -0.118)	-1.61 (-2.162, -1.055)
DALYs (Disability-Adjusted Life Years)	Rwanda	Ischemic stroke	High body-mass index	Rate	Age-standardized	Both	22.361 (2.889, 43.184)	20.721 (2.765, 42.749)	-0.073 (-0.369, 0.381)	-1.248 (-1.693, -0.801)
DALYs (Disability-Adjusted Life Years)	Saint Kitts and Nevis	Ischemic stroke	High body-mass index	Rate	Age-standardized	Both	112.731 (15.332, 223.598)	93.125 (14.485, 183.272)	-0.174 (-0.327, 0.028)	-0.605 (-0.796, -0.413)
DALYs (Disability-Adjusted Life Years)	Saint Lucia	Ischemic stroke	High body-mass index	Rate	Age-standardized	Both	71.718 (10.663, 139.691)	51.231 (7.779, 102.344)	-0.286 (-0.434, -0.121)	-1.448 (-1.78, -1.114)
DALYs (Disability-Adjusted Life Years)	Saint Vincent and the Grenadines	Ischemic stroke	High body-mass index	Rate	Age-standardized	Both	40.671 (5.619, 77.754)	44.474 (6.684, 87.166)	0.093 (-0.113, 0.36)	0.285 (0.129, 0.441)
DALYs (Disability-Adjusted Life Years)	Samoa	Ischemic stroke	High body-mass index	Rate	Age-standardized	Both	92.457 (15.08, 177.97)	108.73 (18.445, 202.542)	0.176 (-0.064, 0.487)	0.456 (0.39, 0.522)
DALYs (Disability-Adjusted Life Years)	San Marino	Ischemic stroke	High body-mass index	Rate	Age-standardized	Both	41.485 (6.128, 83.513)	21.089 (3.068, 43.497)	-0.492 (-0.615, -0.342)	-1.913 (-2.143, -1.684)
DALYs (Disability-Adjusted Life Years)	Sao Tome and Principe	Ischemic stroke	High body-mass index	Rate	Age-standardized	Both	51.886 (6.743, 103.899)	98.575 (13.917, 188.747)	0.9 (0.48, 1.416)	1.998 (1.894, 2.101)
DALYs (Disability-Adjusted Life Years)	Saudi Arabia	Ischemic stroke	High body-mass index	Rate	Age-standardized	Both	140.566 (20.415, 280.612)	187.307 (32.413, 352.831)	0.333 (-0.039, 0.899)	0.788 (0.613, 0.962)
DALYs (Disability-Adjusted Life Years)	Senegal	Ischemic stroke	High body-mass index	Rate	Age-standardized	Both	49.846 (6.526, 94.986)	66.408 (9.293, 128.604)	0.332 (0.019, 0.739)	0.833 (0.761, 0.906)
DALYs (Disability-Adjusted Life Years)	Serbia	Ischemic stroke	High body-mass index	Rate	Age-standardized	Both	206.432 (31.622, 432.25)	178.469 (26.925, 353.557)	-0.135 (-0.316, 0.086)	-1.097 (-1.383, -0.81)
DALYs (Disability-Adjusted Life Years)	Seychelles	Ischemic stroke	High body-mass index	Rate	Age-standardized	Both	56.736 (8.119, 106.943)	70.681 (11.035, 130.581)	0.246 (0.041, 0.491)	0.915 (0.793, 1.037)
DALYs (Disability-Adjusted Life Years)	Sierra Leone	Ischemic stroke	High body-mass index	Rate	Age-standardized	Both	36.775 (4.702, 71.829)	62.816 (8.174, 123.963)	0.708 (0.31, 1.322)	1.945 (1.844, 2.046)
DALYs (Disability-Adjusted Life Years)	Singapore	Ischemic stroke	High body-mass index	Rate	Age-standardized	Both	22.307 (2.902, 43.237)	11.703 (1.653, 22.477)	-0.475 (-0.589, -0.347)	-2.474 (-2.673, -2.275)
DALYs (Disability-Adjusted Life Years)	Slovakia	Ischemic stroke	High body-mass index	Rate	Age-standardized	Both	163.196 (23.85, 316.921)	94.427 (14.163, 183.149)	-0.421 (-0.528, -0.287)	-1.87 (-1.98, -1.76)
DALYs (Disability-Adjusted Life Years)	Slovenia	Ischemic stroke	High body-mass index	Rate	Age-standardized	Both	112.848 (16.417, 221.005)	37.543 (5.338, 78.304)	-0.667 (-0.717, -0.62)	-3.649 (-3.872, -3.425)
DALYs (Disability-Adjusted Life Years)	Solomon Islands	Ischemic stroke	High body-mass index	Rate	Age-standardized	Both	48.597 (6.439, 102.443)	69.738 (10.134, 141.987)	0.435 (0.11, 0.915)	1.164 (1.018, 1.31)
DALYs (Disability-Adjusted Life Years)	Somalia	Ischemic stroke	High body-mass index	Rate	Age-standardized	Both	15.704 (1.68, 32.629)	21.464 (2.525, 45.706)	0.367 (0.03, 0.861)	0.94 (0.842, 1.039)
DALYs (Disability-Adjusted Life Years)	South Africa	Ischemic stroke	High body-mass index	Rate	Age-standardized	Both	65.115 (9.761, 125.082)	102.199 (15.384, 197.469)	0.57 (0.381, 0.83)	1.543 (1.12, 1.968)
DALYs (Disability-Adjusted Life Years)	South Sudan	Ischemic stroke	High body-mass index	Rate	Age-standardized	Both	8.721 (1.036, 17.834)	11.906 (1.436, 24.391)	0.365 (-0.037, 1.007)	0.827 (0.513, 1.141)
DALYs (Disability-Adjusted Life Years)	Spain	Ischemic stroke	High body-mass index	Rate	Age-standardized	Both	55.038 (7.721, 109.88)	22.236 (3.289, 45.353)	-0.596 (-0.657, -0.537)	-3.047 (-3.29, -2.804)
DALYs (Disability-Adjusted Life Years)	Sri Lanka	Ischemic stroke	High body-mass index	Rate	Age-standardized	Both	27.337 (3.55, 53.424)	39.325 (5.375, 82.922)	0.439 (0.008, 1.019)	1.417 (1.224, 1.611)
DALYs (Disability-Adjusted Life Years)	Sudan	Ischemic stroke	High body-mass index	Rate	Age-standardized	Both	114.388 (15.469, 237.948)	158.102 (24.319, 318.627)	0.382 (-0.006, 0.929)	0.938 (0.9, 0.975)
DALYs (Disability-Adjusted Life Years)	Suriname	Ischemic stroke	High body-mass index	Rate	Age-standardized	Both	35.346 (5, 70.731)	45.937 (6.914, 91.468)	0.3 (-0.028, 0.735)	0.729 (0.451, 1.008)
DALYs (Disability-Adjusted Life Years)	Sweden	Ischemic stroke	High body-mass index	Rate	Age-standardized	Both	36.934 (5.215, 73.833)	18.408 (2.594, 36.282)	-0.502 (-0.567, -0.42)	-2.507 (-2.64, -2.373)
DALYs (Disability-Adjusted Life Years)	Switzerland	Ischemic stroke	High body-mass index	Rate	Age-standardized	Both	29.167 (4.142, 59.111)	11.632 (1.617, 23.211)	-0.601 (-0.657, -0.538)	-2.944 (-3.139, -2.749)
DALYs (Disability-Adjusted Life Years)	Syrian Arab Republic	Ischemic stroke	High body-mass index	Rate	Age-standardized	Both	123.189 (19.297, 232.101)	165.687 (27.133, 325.521)	0.345 (-0.018, 0.904)	0.46 (0.213, 0.709)
DALYs (Disability-Adjusted Life Years)	Taiwan (Province of China)	Ischemic stroke	High body-mass index	Rate	Age-standardized	Both	30.521 (4.124, 59.596)	23.364 (3.263, 45.428)	-0.234 (-0.395, -0.055)	-0.842 (-1.029, -0.654)
DALYs (Disability-Adjusted Life Years)	Tajikistan	Ischemic stroke	High body-mass index	Rate	Age-standardized	Both	119.799 (17.316, 228.501)	111.73 (16.704, 224.011)	-0.067 (-0.287, 0.235)	-0.551 (-0.871, -0.23)
DALYs (Disability-Adjusted Life Years)	Thailand	Ischemic stroke	High body-mass index	Rate	Age-standardized	Both	17.959 (2.246, 34.517)	31.571 (4.907, 60.394)	0.758 (0.326, 1.416)	1.415 (1.168, 1.663)
DALYs (Disability-Adjusted Life Years)	Timor-Leste	Ischemic stroke	High body-mass index	Rate	Age-standardized	Both	5.121 (0.566, 10.704)	13.5 (1.713, 27.147)	1.636 (0.52, 3.526)	3.551 (3.215, 3.888)
DALYs (Disability-Adjusted Life Years)	Togo	Ischemic stroke	High body-mass index	Rate	Age-standardized	Both	41.096 (5.14, 81.237)	73.807 (10.061, 144.002)	0.796 (0.365, 1.465)	1.81 (1.721, 1.899)
DALYs (Disability-Adjusted Life Years)	Tokelau	Ischemic stroke	High body-mass index	Rate	Age-standardized	Both	85.773 (13.138, 173.358)	94.854 (15.617, 188.76)	0.106 (-0.127, 0.459)	0.189 (0.124, 0.253)
DALYs (Disability-Adjusted Life Years)	Tonga	Ischemic stroke	High body-mass index	Rate	Age-standardized	Both	64.852 (10.339, 117.619)	80.828 (13.33, 147.449)	0.246 (-0.009, 0.54)	0.745 (0.666, 0.824)
DALYs (Disability-Adjusted Life Years)	Trinidad and Tobago	Ischemic stroke	High body-mass index	Rate	Age-standardized	Both	80.4 (12.292, 151.444)	61.386 (9.034, 118.909)	-0.236 (-0.41, -0.034)	-1.378 (-1.615, -1.14)
DALYs (Disability-Adjusted Life Years)	Tunisia	Ischemic stroke	High body-mass index	Rate	Age-standardized	Both	63.03 (9.198, 131.359)	96.474 (15.117, 198.778)	0.531 (0.14, 1.131)	1.226 (1.124, 1.328)
DALYs (Disability-Adjusted Life Years)	Turkey	Ischemic stroke	High body-mass index	Rate	Age-standardized	Both	106.359 (14.915, 206.731)	83.328 (13.308, 163.692)	-0.217 (-0.378, 0.034)	-1.034 (-1.253, -0.815)
DALYs (Disability-Adjusted Life Years)	Turkmenistan	Ischemic stroke	High body-mass index	Rate	Age-standardized	Both	134.443 (20.681, 273.365)	181.343 (27.174, 372.582)	0.349 (0.064, 0.696)	0.79 (0.354, 1.228)
DALYs (Disability-Adjusted Life Years)	Tuvalu	Ischemic stroke	High body-mass index	Rate	Age-standardized	Both	97.441 (14.036, 192.981)	119.696 (18.803, 228.941)	0.228 (-0.001, 0.522)	0.662 (0.61, 0.715)
DALYs (Disability-Adjusted Life Years)	Uganda	Ischemic stroke	High body-mass index	Rate	Age-standardized	Both	13.574 (1.802, 27.109)	21.367 (2.924, 42.413)	0.574 (0.165, 1.099)	0.851 (0.597, 1.105)
DALYs (Disability-Adjusted Life Years)	Ukraine	Ischemic stroke	High body-mass index	Rate	Age-standardized	Both	192.119 (27.745, 367.425)	152.09 (24.755, 297.806)	-0.208 (-0.388, 0.02)	-1.4 (-1.695, -1.105)
DALYs (Disability-Adjusted Life Years)	United Arab Emirates	Ischemic stroke	High body-mass index	Rate	Age-standardized	Both	126.259 (18.51, 247.394)	140.429 (22.679, 262.115)	0.112 (-0.122, 0.485)	1.387 (1.012, 1.764)
DALYs (Disability-Adjusted Life Years)	United Kingdom	Ischemic stroke	High body-mass index	Rate	Age-standardized	Both	59.607 (8.626, 119.526)	22.509 (3.244, 45.012)	-0.622 (-0.66, -0.585)	-3.462 (-3.626, -3.297)
DALYs (Disability-Adjusted Life Years)	United Republic of Tanzania	Ischemic stroke	High body-mass index	Rate	Age-standardized	Both	19.475 (2.27, 38.169)	47.627 (6.429, 96.557)	1.446 (0.758, 2.461)	2.861 (2.69, 3.032)
DALYs (Disability-Adjusted Life Years)	United States of America	Ischemic stroke	High body-mass index	Rate	Age-standardized	Both	41.119 (6.045, 81.011)	41.253 (6.236, 76.924)	0.003 (-0.119, 0.122)	-0.455 (-0.672, -0.237)
DALYs (Disability-Adjusted Life Years)	United States Virgin Islands	Ischemic stroke	High body-mass index	Rate	Age-standardized	Both	56.88 (9.225, 112.289)	33.533 (5.393, 66.595)	-0.41 (-0.541, -0.236)	-1.622 (-1.771, -1.474)
DALYs (Disability-Adjusted Life Years)	Uruguay	Ischemic stroke	High body-mass index	Rate	Age-standardized	Both	80.223 (11.555, 157.894)	48.461 (7.254, 97.195)	-0.396 (-0.465, -0.313)	-1.876 (-2.042, -1.71)
DALYs (Disability-Adjusted Life Years)	Uzbekistan	Ischemic stroke	High body-mass index	Rate	Age-standardized	Both	117.139 (17.448, 226.844)	125.26 (18.543, 254.447)	0.069 (-0.095, 0.261)	-0.333 (-0.641, -0.024)
DALYs (Disability-Adjusted Life Years)	Vanuatu	Ischemic stroke	High body-mass index	Rate	Age-standardized	Both	55.772 (7.306, 116.99)	75.44 (10.68, 157.173)	0.353 (0.034, 0.768)	0.819 (0.755, 0.883)
DALYs (Disability-Adjusted Life Years)	Venezuela (Bolivarian Republic of)	Ischemic stroke	High body-mass index	Rate	Age-standardized	Both	39.172 (6.052, 80.233)	42.558 (6.52, 84.504)	0.086 (-0.172, 0.443)	-0.125 (-0.417, 0.168)
DALYs (Disability-Adjusted Life Years)	Viet Nam	Ischemic stroke	High body-mass index	Rate	Age-standardized	Both	7.314 (0.923, 14.61)	22.044 (2.749, 43.347)	2.014 (0.999, 3.438)	4.347 (4.041, 4.653)
DALYs (Disability-Adjusted Life Years)	Yemen	Ischemic stroke	High body-mass index	Rate	Age-standardized	Both	67.237 (8.748, 138.58)	132.055 (17.532, 260.856)	0.964 (0.395, 1.852)	2.076 (1.931, 2.221)
DALYs (Disability-Adjusted Life Years)	Zambia	Ischemic stroke	High body-mass index	Rate	Age-standardized	Both	18.072 (2.2, 36.231)	51.743 (7.183, 105.268)	1.863 (1.023, 3.126)	3.254 (3.147, 3.362)
DALYs (Disability-Adjusted Life Years)	Zimbabwe	Ischemic stroke	High body-mass index	Rate	Age-standardized	Both	23.589 (3.44, 44.985)	81.783 (11.694, 157.146)	2.467 (1.592, 3.958)	4.785 (4.145, 5.429)
