# Supplementary material for: Global Ischemic Stroke Burden Due to High BMI, 1990–2021: An Age-Period-Cohort Study and Future Risk Prediction Using GBD Data
Source: Research Square preprint supplement (doi:10.21203/rs.3.rs-7557435/v1), 2025-09-23
Supplement: Supplementary file 2 [file 6857f6710ab1a623b8d373ae.xlsx]

## Sheet: Sheet1
							1990	2021
measure_name	location_name	cause_name	rei_name	metric_name	age_name	sex_name	val_95UI	val_95UI	PC	EAPC_CI
Deaths	Afghanistan	Ischemic stroke	High body-mass index	Rate	Age-standardized	Both	3.942 (0.503, 7.87)	5.604 (0.845, 12.102)	0.422 (0.022, 1.02)	0.987 (0.864, 1.11)
Deaths	Albania	Ischemic stroke	High body-mass index	Rate	Age-standardized	Both	2.89 (0.419, 6.207)	2.825 (0.386, 6.178)	-0.022 (-0.329, 0.368)	0.315 (0.064, 0.566)
Deaths	Algeria	Ischemic stroke	High body-mass index	Rate	Age-standardized	Both	3.684 (0.511, 7.969)	5.299 (0.839, 11.066)	0.438 (0.043, 0.991)	1.249 (1.203, 1.296)
Deaths	American Samoa	Ischemic stroke	High body-mass index	Rate	Age-standardized	Both	3.057 (0.479, 6.004)	3.151 (0.5, 6.193)	0.031 (-0.205, 0.327)	-0.21 (-0.376, -0.045)
Deaths	Andorra	Ischemic stroke	High body-mass index	Rate	Age-standardized	Both	1.099 (0.159, 2.466)	0.64 (0.091, 1.412)	-0.418 (-0.621, -0.116)	-1.514 (-1.76, -1.266)
Deaths	Angola	Ischemic stroke	High body-mass index	Rate	Age-standardized	Both	0.664 (0.08, 1.34)	1.525 (0.206, 3.118)	1.297 (0.571, 2.435)	2.379 (2.228, 2.531)
Deaths	Antigua and Barbuda	Ischemic stroke	High body-mass index	Rate	Age-standardized	Both	2.013 (0.298, 4.126)	2.098 (0.309, 4.252)	0.042 (-0.166, 0.267)	-0.061 (-0.281, 0.159)
Deaths	Argentina	Ischemic stroke	High body-mass index	Rate	Age-standardized	Both	2.728 (0.392, 5.546)	1.386 (0.204, 2.933)	-0.492 (-0.562, -0.397)	-1.869 (-2.063, -1.676)
Deaths	Armenia	Ischemic stroke	High body-mass index	Rate	Age-standardized	Both	4.602 (0.692, 9.356)	3.62 (0.565, 7.54)	-0.213 (-0.332, -0.066)	-1.806 (-2.182, -1.428)
Deaths	Australia	Ischemic stroke	High body-mass index	Rate	Age-standardized	Both	1.855 (0.261, 3.912)	0.816 (0.117, 1.839)	-0.56 (-0.649, -0.458)	-2.942 (-3.069, -2.814)
Deaths	Austria	Ischemic stroke	High body-mass index	Rate	Age-standardized	Both	2.84 (0.392, 5.981)	0.663 (0.09, 1.465)	-0.767 (-0.804, -0.722)	-5.12 (-5.483, -4.756)
Deaths	Azerbaijan	Ischemic stroke	High body-mass index	Rate	Age-standardized	Both	2.65 (0.377, 5.427)	2.781 (0.395, 5.798)	0.05 (-0.282, 0.568)	0.249 (-0.077, 0.578)
Deaths	Bahamas	Ischemic stroke	High body-mass index	Rate	Age-standardized	Both	1.938 (0.282, 3.873)	2.024 (0.283, 4.035)	0.044 (-0.197, 0.332)	0.146 (0.019, 0.273)
Deaths	Bahrain	Ischemic stroke	High body-mass index	Rate	Age-standardized	Both	4.681 (0.652, 9.586)	4.786 (0.785, 9.952)	0.023 (-0.209, 0.322)	-0.543 (-0.952, -0.132)
Deaths	Bangladesh	Ischemic stroke	High body-mass index	Rate	Age-standardized	Both	0.348 (0.039, 0.725)	0.841 (0.11, 1.811)	1.42 (0.563, 2.524)	3.182 (3.015, 3.349)
Deaths	Barbados	Ischemic stroke	High body-mass index	Rate	Age-standardized	Both	2.947 (0.419, 6)	2.939 (0.442, 6.19)	-0.003 (-0.256, 0.309)	-0.21 (-0.383, -0.038)
Deaths	Belarus	Ischemic stroke	High body-mass index	Rate	Age-standardized	Both	6.262 (0.901, 12.567)	6.077 (0.912, 12.328)	-0.03 (-0.216, 0.204)	-0.919 (-1.419, -0.417)
Deaths	Belgium	Ischemic stroke	High body-mass index	Rate	Age-standardized	Both	1.944 (0.271, 3.917)	0.753 (0.105, 1.617)	-0.613 (-0.685, -0.527)	-2.989 (-3.097, -2.882)
Deaths	Belize	Ischemic stroke	High body-mass index	Rate	Age-standardized	Both	1.543 (0.221, 3.178)	1.973 (0.309, 4.005)	0.279 (0.05, 0.564)	0.429 (-0.15, 1.012)
Deaths	Benin	Ischemic stroke	High body-mass index	Rate	Age-standardized	Both	1.755 (0.228, 3.591)	2.616 (0.368, 5.401)	0.491 (0.079, 1.18)	1.322 (1.159, 1.484)
Deaths	Bermuda	Ischemic stroke	High body-mass index	Rate	Age-standardized	Both	2.57 (0.371, 5.424)	1.568 (0.245, 3.244)	-0.39 (-0.519, -0.214)	-1.737 (-1.95, -1.523)
Deaths	Bhutan	Ischemic stroke	High body-mass index	Rate	Age-standardized	Both	0.986 (0.144, 2.056)	1.26 (0.191, 2.724)	0.278 (-0.13, 0.887)	0.791 (0.7, 0.882)
Deaths	Bolivia (Plurinational State of)	Ischemic stroke	High body-mass index	Rate	Age-standardized	Both	1.495 (0.195, 3.137)	1.539 (0.203, 3.381)	0.03 (-0.262, 0.49)	0.077 (-0.038, 0.193)
Deaths	Bosnia and Herzegovina	Ischemic stroke	High body-mass index	Rate	Age-standardized	Both	6.132 (0.853, 12.723)	5.864 (0.871, 12.301)	-0.044 (-0.292, 0.276)	-0.571 (-0.727, -0.415)
Deaths	Botswana	Ischemic stroke	High body-mass index	Rate	Age-standardized	Both	2.224 (0.289, 4.637)	3.417 (0.451, 6.97)	0.536 (0.017, 1.448)	1.75 (1.392, 2.109)
Deaths	Brazil	Ischemic stroke	High body-mass index	Rate	Age-standardized	Both	3.252 (0.466, 6.691)	1.952 (0.281, 4.003)	-0.4 (-0.47, -0.302)	-1.614 (-1.727, -1.501)
Deaths	Brunei Darussalam	Ischemic stroke	High body-mass index	Rate	Age-standardized	Both	0.994 (0.131, 1.926)	0.892 (0.121, 1.801)	-0.103 (-0.351, 0.271)	-0.303 (-0.489, -0.115)
Deaths	Bulgaria	Ischemic stroke	High body-mass index	Rate	Age-standardized	Both	10.46 (1.483, 20.974)	10.62 (1.583, 22.157)	0.015 (-0.146, 0.205)	0.219 (0.05, 0.389)
Deaths	Burkina Faso	Ischemic stroke	High body-mass index	Rate	Age-standardized	Both	0.373 (0.051, 0.78)	0.616 (0.079, 1.287)	0.65 (0.121, 1.441)	1.867 (1.789, 1.946)
Deaths	Burundi	Ischemic stroke	High body-mass index	Rate	Age-standardized	Both	0.687 (0.077, 1.516)	0.651 (0.078, 1.36)	-0.052 (-0.399, 0.436)	-0.891 (-1.214, -0.567)
Deaths	Cabo Verde	Ischemic stroke	High body-mass index	Rate	Age-standardized	Both	1.005 (0.126, 2.062)	2.74 (0.427, 5.583)	1.727 (0.916, 2.994)	3.073 (2.744, 3.402)
Deaths	Cambodia	Ischemic stroke	High body-mass index	Rate	Age-standardized	Both	0.467 (0.057, 0.92)	0.76 (0.102, 1.564)	0.626 (0.067, 1.438)	1.433 (1.278, 1.588)
Deaths	Cameroon	Ischemic stroke	High body-mass index	Rate	Age-standardized	Both	2.236 (0.284, 4.61)	4.648 (0.657, 10.032)	1.079 (0.471, 2.169)	2.487 (2.032, 2.943)
Deaths	Canada	Ischemic stroke	High body-mass index	Rate	Age-standardized	Both	1.579 (0.227, 3.328)	0.714 (0.101, 1.565)	-0.548 (-0.625, -0.457)	-3.081 (-3.31, -2.85)
Deaths	Central African Republic	Ischemic stroke	High body-mass index	Rate	Age-standardized	Both	0.761 (0.084, 1.638)	1.531 (0.186, 3.52)	1.013 (0.385, 1.919)	2.21 (2.158, 2.263)
Deaths	Chad	Ischemic stroke	High body-mass index	Rate	Age-standardized	Both	1.041 (0.125, 2.377)	1.788 (0.226, 3.862)	0.717 (0.163, 1.584)	1.724 (1.594, 1.854)
Deaths	Chile	Ischemic stroke	High body-mass index	Rate	Age-standardized	Both	3.123 (0.45, 6.434)	1.605 (0.232, 3.288)	-0.486 (-0.556, -0.413)	-1.697 (-1.894, -1.499)
Deaths	China	Ischemic stroke	High body-mass index	Rate	Age-standardized	Both	0.984 (0.125, 1.991)	2.205 (0.3, 4.578)	1.242 (0.71, 1.972)	2.696 (2.51, 2.882)
Deaths	Colombia	Ischemic stroke	High body-mass index	Rate	Age-standardized	Both	1.507 (0.212, 2.98)	0.938 (0.139, 1.969)	-0.378 (-0.497, -0.228)	-2.077 (-2.375, -1.778)
Deaths	Comoros	Ischemic stroke	High body-mass index	Rate	Age-standardized	Both	0.978 (0.122, 1.958)	1.632 (0.226, 3.312)	0.669 (0.116, 1.456)	1.377 (1.153, 1.602)
Deaths	Congo	Ischemic stroke	High body-mass index	Rate	Age-standardized	Both	1.235 (0.13, 2.64)	2.639 (0.327, 5.658)	1.137 (0.479, 2.021)	2.131 (1.973, 2.29)
Deaths	Cook Islands	Ischemic stroke	High body-mass index	Rate	Age-standardized	Both	2.76 (0.391, 5.626)	1.961 (0.31, 4.004)	-0.289 (-0.476, -0.023)	-1.187 (-1.368, -1.006)
Deaths	Costa Rica	Ischemic stroke	High body-mass index	Rate	Age-standardized	Both	1.109 (0.153, 2.287)	0.974 (0.147, 2.044)	-0.122 (-0.276, 0.077)	-0.971 (-1.365, -0.575)
Deaths	Cote d'Ivoire	Ischemic stroke	High body-mass index	Rate	Age-standardized	Both	1.882 (0.232, 3.698)	3.161 (0.412, 6.363)	0.679 (0.196, 1.399)	1.669 (1.479, 1.86)
Deaths	Croatia	Ischemic stroke	High body-mass index	Rate	Age-standardized	Both	7.277 (1.025, 15.157)	3.315 (0.482, 7.179)	-0.544 (-0.62, -0.453)	-2.725 (-2.894, -2.555)
Deaths	Cuba	Ischemic stroke	High body-mass index	Rate	Age-standardized	Both	1.299 (0.194, 2.5)	1.907 (0.276, 3.808)	0.468 (0.152, 0.847)	1.366 (1.238, 1.494)
Deaths	Cyprus	Ischemic stroke	High body-mass index	Rate	Age-standardized	Both	2.833 (0.376, 5.854)	1.449 (0.221, 3.273)	-0.489 (-0.655, -0.25)	-2.545 (-2.795, -2.294)
Deaths	Czechia	Ischemic stroke	High body-mass index	Rate	Age-standardized	Both	10.538 (1.544, 21.924)	2.222 (0.334, 4.707)	-0.789 (-0.823, -0.752)	-5.388 (-5.745, -5.03)
Deaths	Democratic People's Republic of Korea	Ischemic stroke	High body-mass index	Rate	Age-standardized	Both	0.754 (0.092, 1.752)	1.991 (0.259, 4.644)	1.641 (0.836, 2.779)	3.134 (3.11, 3.159)
Deaths	Democratic Republic of the Congo	Ischemic stroke	High body-mass index	Rate	Age-standardized	Both	0.824 (0.09, 1.761)	1.93 (0.236, 4.232)	1.343 (0.576, 2.33)	2.672 (2.59, 2.754)
Deaths	Denmark	Ischemic stroke	High body-mass index	Rate	Age-standardized	Both	1.75 (0.251, 3.567)	0.822 (0.114, 1.73)	-0.53 (-0.612, -0.438)	-2.837 (-3.042, -2.631)
Deaths	Djibouti	Ischemic stroke	High body-mass index	Rate	Age-standardized	Both	0.366 (0.041, 0.837)	0.677 (0.085, 1.416)	0.847 (0.184, 1.827)	1.813 (1.736, 1.889)
Deaths	Dominica	Ischemic stroke	High body-mass index	Rate	Age-standardized	Both	3.746 (0.534, 7.529)	4.421 (0.673, 9.123)	0.18 (-0.065, 0.464)	0.494 (0.416, 0.571)
Deaths	Dominican Republic	Ischemic stroke	High body-mass index	Rate	Age-standardized	Both	0.988 (0.13, 2.061)	1.785 (0.277, 3.668)	0.806 (0.271, 1.583)	2.21 (2.014, 2.406)
Deaths	Ecuador	Ischemic stroke	High body-mass index	Rate	Age-standardized	Both	1.47 (0.211, 2.98)	1.279 (0.178, 2.619)	-0.13 (-0.354, 0.152)	-0.256 (-0.587, 0.076)
Deaths	Egypt	Ischemic stroke	High body-mass index	Rate	Age-standardized	Both	11.739 (1.725, 25.441)	15.806 (2.578, 31.828)	0.346 (0.018, 0.802)	1.381 (1.218, 1.545)
Deaths	El Salvador	Ischemic stroke	High body-mass index	Rate	Age-standardized	Both	1.311 (0.182, 2.746)	1.205 (0.169, 2.485)	-0.081 (-0.303, 0.193)	-0.543 (-0.877, -0.208)
Deaths	Equatorial Guinea	Ischemic stroke	High body-mass index	Rate	Age-standardized	Both	1.395 (0.176, 2.945)	2.946 (0.388, 6.014)	1.112 (0.3, 2.44)	2.171 (1.908, 2.435)
Deaths	Eritrea	Ischemic stroke	High body-mass index	Rate	Age-standardized	Both	0.398 (0.039, 0.868)	0.672 (0.084, 1.462)	0.689 (0.095, 1.718)	1.729 (1.561, 1.897)
Deaths	Estonia	Ischemic stroke	High body-mass index	Rate	Age-standardized	Both	8.836 (1.301, 17.851)	1.974 (0.278, 4.053)	-0.777 (-0.812, -0.741)	-6.369 (-6.97, -5.764)
Deaths	Eswatini	Ischemic stroke	High body-mass index	Rate	Age-standardized	Both	4.39 (0.543, 9.21)	7.621 (0.977, 16.303)	0.736 (0.192, 1.523)	2.268 (1.797, 2.74)
Deaths	Ethiopia	Ischemic stroke	High body-mass index	Rate	Age-standardized	Both	0.315 (0.033, 0.666)	0.389 (0.049, 0.798)	0.237 (-0.262, 0.894)	0.336 (0.177, 0.495)
Deaths	Fiji	Ischemic stroke	High body-mass index	Rate	Age-standardized	Both	2.607 (0.353, 5.506)	3.694 (0.557, 7.571)	0.417 (0.034, 1.014)	0.744 (0.518, 0.971)
Deaths	Finland	Ischemic stroke	High body-mass index	Rate	Age-standardized	Both	2.705 (0.392, 5.576)	1.043 (0.147, 2.153)	-0.614 (-0.683, -0.534)	-3.132 (-3.246, -3.018)
Deaths	France	Ischemic stroke	High body-mass index	Rate	Age-standardized	Both	1.356 (0.191, 2.681)	0.648 (0.089, 1.366)	-0.522 (-0.616, -0.418)	-2.33 (-2.429, -2.231)
Deaths	Gabon	Ischemic stroke	High body-mass index	Rate	Age-standardized	Both	1.974 (0.26, 3.888)	3.474 (0.466, 6.992)	0.76 (0.268, 1.475)	1.66 (1.456, 1.864)
Deaths	Gambia	Ischemic stroke	High body-mass index	Rate	Age-standardized	Both	1.817 (0.229, 3.723)	3.376 (0.431, 6.871)	0.858 (0.291, 1.704)	1.94 (1.8, 2.081)
Deaths	Georgia	Ischemic stroke	High body-mass index	Rate	Age-standardized	Both	3.966 (0.562, 8.263)	5.712 (0.808, 11.464)	0.44 (0.146, 0.904)	1.131 (0.571, 1.695)
Deaths	Germany	Ischemic stroke	High body-mass index	Rate	Age-standardized	Both	3.31 (0.459, 6.723)	1.026 (0.146, 2.198)	-0.69 (-0.734, -0.643)	-3.907 (-4.173, -3.641)
Deaths	Ghana	Ischemic stroke	High body-mass index	Rate	Age-standardized	Both	1.598 (0.2, 3.266)	4.347 (0.558, 9.039)	1.721 (0.838, 3.122)	3.486 (3.285, 3.687)
Deaths	Greece	Ischemic stroke	High body-mass index	Rate	Age-standardized	Both	3.597 (0.504, 7.724)	1.573 (0.224, 3.492)	-0.563 (-0.666, -0.459)	-3.445 (-3.808, -3.082)
Deaths	Greenland	Ischemic stroke	High body-mass index	Rate	Age-standardized	Both	5.464 (0.772, 11.751)	2.107 (0.322, 4.549)	-0.614 (-0.7, -0.496)	-3.329 (-3.51, -3.148)
Deaths	Grenada	Ischemic stroke	High body-mass index	Rate	Age-standardized	Both	3.169 (0.448, 6.382)	2.567 (0.345, 5.258)	-0.19 (-0.366, 0.035)	-0.499 (-0.703, -0.294)
Deaths	Guam	Ischemic stroke	High body-mass index	Rate	Age-standardized	Both	2.206 (0.305, 4.551)	1.06 (0.166, 2.155)	-0.52 (-0.617, -0.38)	-2.16 (-2.552, -1.767)
Deaths	Guatemala	Ischemic stroke	High body-mass index	Rate	Age-standardized	Both	1.34 (0.202, 2.684)	1.123 (0.164, 2.32)	-0.162 (-0.326, 0.035)	-1.044 (-1.358, -0.729)
Deaths	Guinea	Ischemic stroke	High body-mass index	Rate	Age-standardized	Both	1.163 (0.14, 2.398)	2.165 (0.282, 4.515)	0.861 (0.265, 1.836)	2.373 (2.262, 2.484)
Deaths	Guinea-Bissau	Ischemic stroke	High body-mass index	Rate	Age-standardized	Both	1.786 (0.23, 3.754)	3.249 (0.452, 6.483)	0.819 (0.297, 1.623)	2.105 (2.059, 2.152)
Deaths	Guyana	Ischemic stroke	High body-mass index	Rate	Age-standardized	Both	4.351 (0.588, 8.624)	3.876 (0.577, 8.088)	-0.109 (-0.322, 0.167)	0.27 (0.031, 0.51)
Deaths	Haiti	Ischemic stroke	High body-mass index	Rate	Age-standardized	Both	1.156 (0.147, 2.378)	1.825 (0.228, 3.895)	0.578 (0.058, 1.326)	1.763 (1.641, 1.886)
Deaths	Honduras	Ischemic stroke	High body-mass index	Rate	Age-standardized	Both	1.661 (0.227, 3.516)	3.164 (0.45, 6.695)	0.905 (0.443, 1.511)	2.266 (2.055, 2.477)
Deaths	Hungary	Ischemic stroke	High body-mass index	Rate	Age-standardized	Both	9.114 (1.365, 18.754)	3.555 (0.532, 7.006)	-0.61 (-0.678, -0.536)	-3.461 (-3.669, -3.252)
Deaths	Iceland	Ischemic stroke	High body-mass index	Rate	Age-standardized	Both	1.878 (0.276, 3.912)	0.704 (0.097, 1.532)	-0.625 (-0.7, -0.546)	-3.3 (-3.495, -3.104)
Deaths	India	Ischemic stroke	High body-mass index	Rate	Age-standardized	Both	0.296 (0.032, 0.599)	0.668 (0.081, 1.347)	1.259 (0.765, 2.05)	2.638 (2.557, 2.719)
Deaths	Indonesia	Ischemic stroke	High body-mass index	Rate	Age-standardized	Both	0.485 (0.061, 0.953)	1.585 (0.2, 3.297)	2.267 (1.292, 3.6)	4.117 (3.891, 4.344)
Deaths	Iran (Islamic Republic of)	Ischemic stroke	High body-mass index	Rate	Age-standardized	Both	3.666 (0.54, 7.103)	4.124 (0.619, 8.092)	0.125 (-0.118, 0.444)	0.168 (0.018, 0.319)
Deaths	Iraq	Ischemic stroke	High body-mass index	Rate	Age-standardized	Both	9.66 (1.373, 19.688)	10.837 (1.681, 22.634)	0.122 (-0.169, 0.464)	-0.213 (-0.401, -0.025)
Deaths	Ireland	Ischemic stroke	High body-mass index	Rate	Age-standardized	Both	2.362 (0.342, 4.916)	0.728 (0.103, 1.612)	-0.692 (-0.759, -0.605)	-3.859 (-4.083, -3.634)
Deaths	Israel	Ischemic stroke	High body-mass index	Rate	Age-standardized	Both	1.627 (0.233, 3.391)	0.567 (0.079, 1.194)	-0.652 (-0.714, -0.579)	-4.011 (-4.215, -3.805)
Deaths	Italy	Ischemic stroke	High body-mass index	Rate	Age-standardized	Both	2.251 (0.313, 4.597)	0.91 (0.124, 1.978)	-0.596 (-0.671, -0.517)	-3.207 (-3.446, -2.968)
Deaths	Jamaica	Ischemic stroke	High body-mass index	Rate	Age-standardized	Both	2.455 (0.348, 4.775)	2.882 (0.449, 5.937)	0.174 (-0.137, 0.591)	0.76 (0.375, 1.147)
Deaths	Japan	Ischemic stroke	High body-mass index	Rate	Age-standardized	Both	0.767 (0.101, 1.516)	0.292 (0.039, 0.59)	-0.619 (-0.681, -0.539)	-3.465 (-3.634, -3.295)
Deaths	Jordan	Ischemic stroke	High body-mass index	Rate	Age-standardized	Both	8.453 (1.238, 16.763)	5.958 (0.949, 12.44)	-0.295 (-0.457, -0.041)	-1.777 (-2.18, -1.373)
Deaths	Kazakhstan	Ischemic stroke	High body-mass index	Rate	Age-standardized	Both	7.166 (1.051, 14.479)	7.34 (1.078, 15.423)	0.024 (-0.171, 0.277)	-0.595 (-1.133, -0.053)
Deaths	Kenya	Ischemic stroke	High body-mass index	Rate	Age-standardized	Both	0.458 (0.056, 0.938)	1.13 (0.14, 2.347)	1.469 (0.871, 2.372)	3.236 (3.112, 3.36)
Deaths	Kiribati	Ischemic stroke	High body-mass index	Rate	Age-standardized	Both	2.262 (0.325, 4.629)	3.793 (0.567, 7.772)	0.677 (0.263, 1.362)	1.64 (1.573, 1.706)
Deaths	Kuwait	Ischemic stroke	High body-mass index	Rate	Age-standardized	Both	2.594 (0.386, 5.108)	2.983 (0.461, 6.006)	0.15 (-0.115, 0.445)	0.724 (-0.354, 1.814)
Deaths	Kyrgyzstan	Ischemic stroke	High body-mass index	Rate	Age-standardized	Both	6.513 (0.961, 12.889)	5.113 (0.807, 10.071)	-0.215 (-0.351, -0.03)	-1.45 (-1.903, -0.994)
Deaths	Lao People's Democratic Republic	Ischemic stroke	High body-mass index	Rate	Age-standardized	Both	0.94 (0.121, 1.959)	1.371 (0.173, 2.828)	0.458 (-0.1, 1.191)	1.221 (1.201, 1.242)
Deaths	Latvia	Ischemic stroke	High body-mass index	Rate	Age-standardized	Both	9.78 (1.465, 20.375)	6.819 (0.986, 13.915)	-0.303 (-0.406, -0.192)	-1.684 (-1.956, -1.411)
Deaths	Lebanon	Ischemic stroke	High body-mass index	Rate	Age-standardized	Both	4.392 (0.568, 9.105)	2.421 (0.359, 5.062)	-0.449 (-0.618, -0.237)	-2.153 (-2.462, -1.843)
Deaths	Lesotho	Ischemic stroke	High body-mass index	Rate	Age-standardized	Both	2.217 (0.328, 4.931)	5.794 (0.84, 12.042)	1.614 (0.758, 3.026)	4.233 (3.642, 4.827)
Deaths	Liberia	Ischemic stroke	High body-mass index	Rate	Age-standardized	Both	2.281 (0.297, 4.577)	3.944 (0.559, 8.01)	0.729 (0.217, 1.464)	1.702 (1.604, 1.799)
Deaths	Libya	Ischemic stroke	High body-mass index	Rate	Age-standardized	Both	2.849 (0.411, 6.003)	6.378 (0.999, 12.913)	1.239 (0.635, 2.089)	3.056 (2.855, 3.258)
Deaths	Lithuania	Ischemic stroke	High body-mass index	Rate	Age-standardized	Both	4.89 (0.742, 9.885)	4.273 (0.608, 9.125)	-0.126 (-0.258, 0.019)	-0.682 (-1.031, -0.332)
Deaths	Luxembourg	Ischemic stroke	High body-mass index	Rate	Age-standardized	Both	3.841 (0.519, 7.695)	0.848 (0.12, 1.835)	-0.779 (-0.821, -0.729)	-4.759 (-4.854, -4.664)
Deaths	Madagascar	Ischemic stroke	High body-mass index	Rate	Age-standardized	Both	0.792 (0.103, 1.633)	1.6 (0.219, 3.451)	1.02 (0.286, 1.964)	2.139 (2.029, 2.249)
Deaths	Malawi	Ischemic stroke	High body-mass index	Rate	Age-standardized	Both	0.632 (0.073, 1.314)	1.569 (0.199, 3.244)	1.483 (0.751, 2.538)	2.702 (2.492, 2.913)
Deaths	Malaysia	Ischemic stroke	High body-mass index	Rate	Age-standardized	Both	1.228 (0.179, 2.367)	1.767 (0.239, 3.556)	0.439 (0.099, 0.878)	1.364 (1.223, 1.506)
Deaths	Maldives	Ischemic stroke	High body-mass index	Rate	Age-standardized	Both	0.975 (0.121, 1.942)	0.809 (0.111, 1.613)	-0.171 (-0.425, 0.155)	-1.051 (-1.246, -0.856)
Deaths	Mali	Ischemic stroke	High body-mass index	Rate	Age-standardized	Both	0.925 (0.109, 1.999)	1.15 (0.141, 2.415)	0.243 (-0.117, 0.816)	0.798 (0.603, 0.992)
Deaths	Malta	Ischemic stroke	High body-mass index	Rate	Age-standardized	Both	1.989 (0.274, 3.887)	0.732 (0.105, 1.585)	-0.632 (-0.715, -0.522)	-3.407 (-3.726, -3.086)
Deaths	Marshall Islands	Ischemic stroke	High body-mass index	Rate	Age-standardized	Both	3.434 (0.494, 7.606)	4.258 (0.618, 8.923)	0.24 (-0.085, 0.632)	0.586 (0.519, 0.654)
Deaths	Mauritania	Ischemic stroke	High body-mass index	Rate	Age-standardized	Both	3.78 (0.517, 7.91)	4.798 (0.637, 10.458)	0.269 (-0.1, 0.758)	0.576 (0.41, 0.743)
Deaths	Mauritius	Ischemic stroke	High body-mass index	Rate	Age-standardized	Both	2.888 (0.401, 5.553)	1.671 (0.239, 3.337)	-0.422 (-0.528, -0.282)	-3.107 (-3.703, -2.506)
Deaths	Mexico	Ischemic stroke	High body-mass index	Rate	Age-standardized	Both	1.848 (0.268, 3.689)	1.316 (0.207, 2.644)	-0.288 (-0.389, -0.16)	-1.228 (-1.376, -1.079)
Deaths	Micronesia (Federated States of)	Ischemic stroke	High body-mass index	Rate	Age-standardized	Both	3.542 (0.512, 7.439)	4.343 (0.635, 9.067)	0.226 (-0.106, 0.659)	0.581 (0.518, 0.644)
Deaths	Monaco	Ischemic stroke	High body-mass index	Rate	Age-standardized	Both	3.767 (0.488, 7.821)	1.844 (0.273, 3.802)	-0.511 (-0.632, -0.305)	-2.451 (-2.62, -2.281)
Deaths	Mongolia	Ischemic stroke	High body-mass index	Rate	Age-standardized	Both	1.077 (0.164, 2.16)	1.28 (0.157, 2.699)	0.189 (-0.209, 0.722)	0.461 (0.018, 0.907)
Deaths	Montenegro	Ischemic stroke	High body-mass index	Rate	Age-standardized	Both	2.417 (0.354, 5.107)	4.806 (0.648, 10.533)	0.988 (0.436, 1.74)	2.513 (2.393, 2.634)
Deaths	Morocco	Ischemic stroke	High body-mass index	Rate	Age-standardized	Both	3.978 (0.525, 8.605)	6.188 (0.895, 12.811)	0.556 (0.154, 1.096)	1.565 (1.496, 1.635)
Deaths	Mozambique	Ischemic stroke	High body-mass index	Rate	Age-standardized	Both	0.752 (0.094, 1.59)	2.049 (0.263, 4.307)	1.726 (0.793, 2.876)	3.796 (3.612, 3.981)
Deaths	Myanmar	Ischemic stroke	High body-mass index	Rate	Age-standardized	Both	0.872 (0.11, 1.743)	1.043 (0.145, 2.162)	0.196 (-0.193, 0.75)	0.365 (0.256, 0.474)
Deaths	Namibia	Ischemic stroke	High body-mass index	Rate	Age-standardized	Both	2.478 (0.326, 5.489)	4.844 (0.674, 9.911)	0.955 (0.324, 1.86)	1.984 (1.661, 2.307)
Deaths	Nauru	Ischemic stroke	High body-mass index	Rate	Age-standardized	Both	5.714 (0.885, 10.91)	7.53 (1.123, 14.897)	0.318 (-0.003, 0.823)	0.693 (0.321, 1.066)
Deaths	Nepal	Ischemic stroke	High body-mass index	Rate	Age-standardized	Both	0.33 (0.037, 0.662)	0.562 (0.066, 1.211)	0.703 (0.067, 1.773)	1.845 (1.643, 2.047)
Deaths	Netherlands	Ischemic stroke	High body-mass index	Rate	Age-standardized	Both	1.732 (0.237, 3.681)	0.937 (0.136, 1.99)	-0.459 (-0.555, -0.341)	-2.554 (-2.844, -2.262)
Deaths	New Zealand	Ischemic stroke	High body-mass index	Rate	Age-standardized	Both	2.09 (0.295, 4.259)	1.054 (0.147, 2.276)	-0.496 (-0.6, -0.4)	-2.383 (-2.547, -2.218)
Deaths	Nicaragua	Ischemic stroke	High body-mass index	Rate	Age-standardized	Both	1.49 (0.217, 2.949)	1.266 (0.199, 2.611)	-0.15 (-0.342, 0.099)	-0.456 (-0.619, -0.292)
Deaths	Niger	Ischemic stroke	High body-mass index	Rate	Age-standardized	Both	0.821 (0.086, 1.895)	1.04 (0.115, 2.453)	0.267 (-0.152, 0.902)	0.836 (0.742, 0.931)
Deaths	Nigeria	Ischemic stroke	High body-mass index	Rate	Age-standardized	Both	1.681 (0.216, 3.609)	2.761 (0.374, 5.567)	0.643 (0.145, 1.468)	1.405 (1.251, 1.559)
Deaths	Niue	Ischemic stroke	High body-mass index	Rate	Age-standardized	Both	2.852 (0.384, 5.959)	3.613 (0.534, 7.314)	0.267 (-0.054, 0.669)	0.498 (0.409, 0.587)
Deaths	North Macedonia	Ischemic stroke	High body-mass index	Rate	Age-standardized	Both	10.84 (1.592, 21.882)	13.894 (2, 29.559)	0.282 (-0.013, 0.632)	0.544 (0.099, 0.99)
Deaths	Northern Mariana Islands	Ischemic stroke	High body-mass index	Rate	Age-standardized	Both	2.893 (0.442, 5.909)	2.779 (0.427, 5.596)	-0.039 (-0.274, 0.283)	-0.55 (-0.797, -0.302)
Deaths	Norway	Ischemic stroke	High body-mass index	Rate	Age-standardized	Both	2.002 (0.281, 4.134)	0.573 (0.079, 1.183)	-0.714 (-0.757, -0.664)	-4.387 (-4.558, -4.215)
Deaths	Oman	Ischemic stroke	High body-mass index	Rate	Age-standardized	Both	3.355 (0.461, 6.756)	5.029 (0.821, 10.142)	0.499 (0.032, 1.179)	1.938 (1.691, 2.187)
Deaths	Pakistan	Ischemic stroke	High body-mass index	Rate	Age-standardized	Both	0.616 (0.074, 1.364)	1.617 (0.215, 3.241)	1.624 (0.919, 2.682)	3.21 (3.024, 3.395)
Deaths	Palau	Ischemic stroke	High body-mass index	Rate	Age-standardized	Both	4.252 (0.631, 8.497)	4.854 (0.749, 10.098)	0.142 (-0.136, 0.571)	0.543 (0.468, 0.619)
Deaths	Palestine	Ischemic stroke	High body-mass index	Rate	Age-standardized	Both	8.71 (1.257, 19.137)	8.29 (1.331, 16.63)	-0.048 (-0.25, 0.263)	-0.187 (-0.466, 0.092)
Deaths	Panama	Ischemic stroke	High body-mass index	Rate	Age-standardized	Both	2.174 (0.307, 4.657)	1.911 (0.297, 3.909)	-0.121 (-0.321, 0.096)	-0.593 (-0.785, -0.4)
Deaths	Papua New Guinea	Ischemic stroke	High body-mass index	Rate	Age-standardized	Both	0.861 (0.106, 2.005)	1.001 (0.125, 2.224)	0.163 (-0.193, 0.728)	0.325 (0.19, 0.459)
Deaths	Paraguay	Ischemic stroke	High body-mass index	Rate	Age-standardized	Both	2.275 (0.327, 4.678)	2.436 (0.337, 5.168)	0.071 (-0.205, 0.409)	0.381 (0.229, 0.534)
Deaths	Peru	Ischemic stroke	High body-mass index	Rate	Age-standardized	Both	0.887 (0.13, 1.976)	0.812 (0.119, 1.663)	-0.085 (-0.349, 0.245)	-0.929 (-1.362, -0.493)
Deaths	Philippines	Ischemic stroke	High body-mass index	Rate	Age-standardized	Both	0.66 (0.086, 1.35)	1.281 (0.166, 2.509)	0.941 (0.534, 1.507)	2.334 (2.102, 2.567)
Deaths	Poland	Ischemic stroke	High body-mass index	Rate	Age-standardized	Both	7.092 (1.032, 14.097)	3.018 (0.463, 6.475)	-0.574 (-0.626, -0.511)	-3.18 (-3.303, -3.057)
Deaths	Portugal	Ischemic stroke	High body-mass index	Rate	Age-standardized	Both	5.411 (0.711, 11.498)	1.419 (0.191, 3.077)	-0.738 (-0.791, -0.676)	-4.999 (-5.25, -4.747)
Deaths	Puerto Rico	Ischemic stroke	High body-mass index	Rate	Age-standardized	Both	1.548 (0.225, 3.233)	0.715 (0.114, 1.487)	-0.538 (-0.625, -0.423)	-3.017 (-3.273, -2.76)
Deaths	Qatar	Ischemic stroke	High body-mass index	Rate	Age-standardized	Both	5.08 (0.801, 11.453)	3.463 (0.555, 7.379)	-0.318 (-0.497, -0.083)	-1.81 (-2.534, -1.08)
Deaths	Republic of Korea	Ischemic stroke	High body-mass index	Rate	Age-standardized	Both	1.404 (0.191, 2.966)	0.578 (0.072, 1.228)	-0.588 (-0.734, -0.372)	-3.653 (-3.903, -3.402)
Deaths	Republic of Moldova	Ischemic stroke	High body-mass index	Rate	Age-standardized	Both	4.979 (0.735, 10.016)	4.995 (0.728, 10.037)	0.003 (-0.184, 0.23)	0.213 (-0.266, 0.695)
Deaths	Romania	Ischemic stroke	High body-mass index	Rate	Age-standardized	Both	7.99 (1.12, 16.092)	6.092 (0.844, 12.6)	-0.238 (-0.364, -0.076)	-1.476 (-1.789, -1.162)
Deaths	Russian Federation	Ischemic stroke	High body-mass index	Rate	Age-standardized	Both	10.482 (1.515, 21.052)	7.996 (1.164, 16.332)	-0.237 (-0.374, -0.134)	-1.757 (-2.342, -1.169)
Deaths	Rwanda	Ischemic stroke	High body-mass index	Rate	Age-standardized	Both	0.858 (0.105, 1.703)	0.817 (0.108, 1.778)	-0.047 (-0.411, 0.52)	-1.202 (-1.673, -0.729)
Deaths	Saint Kitts and Nevis	Ischemic stroke	High body-mass index	Rate	Age-standardized	Both	5.025 (0.661, 10.245)	4.557 (0.67, 9.255)	-0.093 (-0.268, 0.151)	-0.214 (-0.383, -0.045)
Deaths	Saint Lucia	Ischemic stroke	High body-mass index	Rate	Age-standardized	Both	3.174 (0.458, 6.494)	2.401 (0.338, 4.979)	-0.244 (-0.427, -0.034)	-1.562 (-1.952, -1.169)
Deaths	Saint Vincent and the Grenadines	Ischemic stroke	High body-mass index	Rate	Age-standardized	Both	1.797 (0.239, 3.67)	2.03 (0.298, 4.073)	0.13 (-0.106, 0.434)	0.497 (0.27, 0.724)
Deaths	Samoa	Ischemic stroke	High body-mass index	Rate	Age-standardized	Both	2.946 (0.458, 6.092)	3.512 (0.527, 6.97)	0.192 (-0.115, 0.615)	0.465 (0.372, 0.558)
Deaths	San Marino	Ischemic stroke	High body-mass index	Rate	Age-standardized	Both	2.108 (0.302, 4.581)	0.841 (0.113, 1.986)	-0.601 (-0.734, -0.435)	-2.47 (-2.821, -2.118)
Deaths	Sao Tome and Principe	Ischemic stroke	High body-mass index	Rate	Age-standardized	Both	1.85 (0.242, 3.813)	3.828 (0.524, 7.607)	1.07 (0.546, 1.764)	2.356 (2.283, 2.43)
Deaths	Saudi Arabia	Ischemic stroke	High body-mass index	Rate	Age-standardized	Both	5.947 (0.841, 12.138)	7.837 (1.284, 15.84)	0.318 (-0.043, 0.829)	0.663 (0.478, 0.848)
Deaths	Senegal	Ischemic stroke	High body-mass index	Rate	Age-standardized	Both	1.836 (0.238, 3.65)	2.667 (0.367, 5.329)	0.452 (0.042, 0.979)	1.131 (1.057, 1.204)
Deaths	Serbia	Ischemic stroke	High body-mass index	Rate	Age-standardized	Both	10.761 (1.636, 22.59)	9.242 (1.359, 18.947)	-0.141 (-0.331, 0.094)	-1.189 (-1.494, -0.884)
Deaths	Seychelles	Ischemic stroke	High body-mass index	Rate	Age-standardized	Both	1.792 (0.249, 3.439)	2.435 (0.357, 4.812)	0.359 (0.061, 0.717)	1.334 (1.145, 1.523)
Deaths	Sierra Leone	Ischemic stroke	High body-mass index	Rate	Age-standardized	Both	1.399 (0.171, 2.876)	2.419 (0.297, 5.013)	0.729 (0.264, 1.503)	2.017 (1.9, 2.133)
Deaths	Singapore	Ischemic stroke	High body-mass index	Rate	Age-standardized	Both	0.738 (0.097, 1.482)	0.214 (0.027, 0.439)	-0.71 (-0.787, -0.588)	-4.124 (-4.582, -3.664)
Deaths	Slovakia	Ischemic stroke	High body-mass index	Rate	Age-standardized	Both	6.988 (0.986, 14.434)	3.888 (0.611, 7.968)	-0.444 (-0.56, -0.299)	-2.027 (-2.124, -1.931)
Deaths	Slovenia	Ischemic stroke	High body-mass index	Rate	Age-standardized	Both	5.406 (0.782, 11.094)	1.755 (0.261, 3.829)	-0.675 (-0.744, -0.617)	-3.656 (-3.886, -3.426)
Deaths	Solomon Islands	Ischemic stroke	High body-mass index	Rate	Age-standardized	Both	1.455 (0.184, 3.26)	2.122 (0.281, 4.941)	0.459 (0.067, 1.032)	1.22 (1.025, 1.415)
Deaths	Somalia	Ischemic stroke	High body-mass index	Rate	Age-standardized	Both	0.513 (0.049, 1.129)	0.705 (0.075, 1.589)	0.373 (-0.027, 1.073)	0.974 (0.872, 1.076)
Deaths	South Africa	Ischemic stroke	High body-mass index	Rate	Age-standardized	Both	2.299 (0.329, 4.752)	4.473 (0.658, 8.894)	0.946 (0.647, 1.433)	2.253 (1.702, 2.808)
Deaths	South Sudan	Ischemic stroke	High body-mass index	Rate	Age-standardized	Both	0.33 (0.037, 0.705)	0.442 (0.051, 0.928)	0.339 (-0.095, 1.134)	0.743 (0.39, 1.098)
Deaths	Spain	Ischemic stroke	High body-mass index	Rate	Age-standardized	Both	3.108 (0.44, 6.476)	0.86 (0.125, 1.895)	-0.723 (-0.766, -0.681)	-4.317 (-4.54, -4.094)
Deaths	Sri Lanka	Ischemic stroke	High body-mass index	Rate	Age-standardized	Both	1.15 (0.147, 2.439)	1.752 (0.245, 4.077)	0.524 (-0.057, 1.294)	1.888 (1.642, 2.134)
Deaths	Sudan	Ischemic stroke	High body-mass index	Rate	Age-standardized	Both	4.547 (0.594, 9.833)	6.311 (0.929, 13.046)	0.388 (-0.017, 0.947)	0.912 (0.861, 0.963)
Deaths	Suriname	Ischemic stroke	High body-mass index	Rate	Age-standardized	Both	1.448 (0.202, 2.875)	1.879 (0.27, 3.904)	0.298 (-0.082, 0.781)	0.816 (0.516, 1.116)
Deaths	Sweden	Ischemic stroke	High body-mass index	Rate	Age-standardized	Both	1.773 (0.243, 3.814)	0.695 (0.097, 1.523)	-0.608 (-0.673, -0.53)	-3.229 (-3.489, -2.969)
Deaths	Switzerland	Ischemic stroke	High body-mass index	Rate	Age-standardized	Both	1.568 (0.215, 3.404)	0.487 (0.066, 1.059)	-0.689 (-0.75, -0.62)	-3.67 (-3.825, -3.516)
Deaths	Syrian Arab Republic	Ischemic stroke	High body-mass index	Rate	Age-standardized	Both	4.862 (0.738, 9.51)	7.214 (1.13, 14.835)	0.484 (0.044, 1.103)	0.734 (0.477, 0.991)
Deaths	Taiwan (Province of China)	Ischemic stroke	High body-mass index	Rate	Age-standardized	Both	1.175 (0.161, 2.373)	0.584 (0.083, 1.197)	-0.503 (-0.611, -0.379)	-2.333 (-2.578, -2.088)
Deaths	Tajikistan	Ischemic stroke	High body-mass index	Rate	Age-standardized	Both	4.655 (0.639, 9.343)	4.65 (0.661, 9.408)	-0.001 (-0.265, 0.377)	-0.346 (-0.767, 0.077)
Deaths	Thailand	Ischemic stroke	High body-mass index	Rate	Age-standardized	Both	0.563 (0.072, 1.111)	0.922 (0.136, 1.862)	0.639 (0.155, 1.361)	1.028 (0.751, 1.306)
Deaths	Timor-Leste	Ischemic stroke	High body-mass index	Rate	Age-standardized	Both	0.195 (0.02, 0.438)	0.461 (0.056, 0.957)	1.368 (0.31, 3.378)	3.186 (2.825, 3.548)
Deaths	Togo	Ischemic stroke	High body-mass index	Rate	Age-standardized	Both	1.582 (0.201, 3.289)	3.048 (0.383, 6.15)	0.926 (0.372, 1.729)	2.044 (1.95, 2.139)
Deaths	Tokelau	Ischemic stroke	High body-mass index	Rate	Age-standardized	Both	2.96 (0.455, 6.462)	3.26 (0.536, 6.835)	0.101 (-0.182, 0.537)	0.17 (0.084, 0.255)
Deaths	Tonga	Ischemic stroke	High body-mass index	Rate	Age-standardized	Both	1.93 (0.285, 3.911)	2.678 (0.435, 5.388)	0.387 (-0.002, 0.889)	1.174 (1.044, 1.305)
Deaths	Trinidad and Tobago	Ischemic stroke	High body-mass index	Rate	Age-standardized	Both	3.531 (0.529, 6.939)	2.676 (0.377, 5.272)	-0.242 (-0.43, -0.029)	-1.332 (-1.574, -1.088)
Deaths	Tunisia	Ischemic stroke	High body-mass index	Rate	Age-standardized	Both	2.658 (0.37, 5.583)	4.222 (0.641, 9.168)	0.588 (0.115, 1.238)	1.35 (1.221, 1.478)
Deaths	Turkey	Ischemic stroke	High body-mass index	Rate	Age-standardized	Both	4.536 (0.614, 8.93)	3.813 (0.582, 8.039)	-0.159 (-0.362, 0.123)	-0.614 (-0.938, -0.29)
Deaths	Turkmenistan	Ischemic stroke	High body-mass index	Rate	Age-standardized	Both	4.803 (0.735, 9.916)	6.625 (0.962, 14.125)	0.38 (0.055, 0.763)	0.755 (0.266, 1.247)
Deaths	Tuvalu	Ischemic stroke	High body-mass index	Rate	Age-standardized	Both	3.182 (0.442, 6.533)	4.112 (0.606, 8.387)	0.292 (-0.008, 0.676)	0.824 (0.764, 0.883)
Deaths	Uganda	Ischemic stroke	High body-mass index	Rate	Age-standardized	Both	0.46 (0.055, 1.013)	0.715 (0.099, 1.549)	0.553 (0.017, 1.268)	0.662 (0.36, 0.964)
Deaths	Ukraine	Ischemic stroke	High body-mass index	Rate	Age-standardized	Both	9.011 (1.29, 18.101)	6.451 (1.007, 12.877)	-0.284 (-0.466, -0.054)	-1.804 (-2.128, -1.479)
Deaths	United Arab Emirates	Ischemic stroke	High body-mass index	Rate	Age-standardized	Both	4.811 (0.675, 9.854)	6.27 (0.966, 12.613)	0.303 (-0.019, 0.773)	2.512 (1.964, 3.062)
Deaths	United Kingdom	Ischemic stroke	High body-mass index	Rate	Age-standardized	Both	2.985 (0.431, 6.171)	0.909 (0.129, 1.974)	-0.696 (-0.731, -0.668)	-4.161 (-4.394, -3.927)
Deaths	United Republic of Tanzania	Ischemic stroke	High body-mass index	Rate	Age-standardized	Both	0.716 (0.087, 1.496)	1.915 (0.248, 4.131)	1.675 (0.743, 3.122)	3.22 (3.014, 3.426)
Deaths	United States of America	Ischemic stroke	High body-mass index	Rate	Age-standardized	Both	1.528 (0.219, 3.135)	1.301 (0.188, 2.717)	-0.148 (-0.256, -0.056)	-1.162 (-1.51, -0.813)
Deaths	United States Virgin Islands	Ischemic stroke	High body-mass index	Rate	Age-standardized	Both	2.744 (0.423, 5.959)	1.463 (0.227, 3.039)	-0.467 (-0.6, -0.288)	-1.924 (-2.083, -1.764)
Deaths	Uruguay	Ischemic stroke	High body-mass index	Rate	Age-standardized	Both	3.563 (0.516, 7.283)	2.092 (0.309, 4.425)	-0.413 (-0.5, -0.31)	-1.939 (-2.159, -1.719)
Deaths	Uzbekistan	Ischemic stroke	High body-mass index	Rate	Age-standardized	Both	3.997 (0.585, 7.81)	4.629 (0.709, 9.931)	0.158 (-0.043, 0.398)	-0.198 (-0.583, 0.188)
Deaths	Vanuatu	Ischemic stroke	High body-mass index	Rate	Age-standardized	Both	1.799 (0.235, 4.083)	2.324 (0.313, 5.182)	0.291 (-0.062, 0.804)	0.637 (0.562, 0.711)
Deaths	Venezuela (Bolivarian Republic of)	Ischemic stroke	High body-mass index	Rate	Age-standardized	Both	1.708 (0.251, 3.546)	1.998 (0.292, 4.143)	0.17 (-0.139, 0.578)	0.188 (-0.13, 0.507)
Deaths	Viet Nam	Ischemic stroke	High body-mass index	Rate	Age-standardized	Both	0.308 (0.036, 0.639)	0.887 (0.102, 1.876)	1.877 (0.807, 3.543)	4.094 (3.842, 4.346)
Deaths	Yemen	Ischemic stroke	High body-mass index	Rate	Age-standardized	Both	2.641 (0.344, 5.446)	5.577 (0.726, 11.246)	1.112 (0.449, 2.088)	2.288 (2.095, 2.481)
Deaths	Zambia	Ischemic stroke	High body-mass index	Rate	Age-standardized	Both	0.666 (0.074, 1.424)	2.005 (0.261, 4.295)	2.009 (1.011, 3.593)	3.428 (3.293, 3.563)
Deaths	Zimbabwe	Ischemic stroke	High body-mass index	Rate	Age-standardized	Both	0.909 (0.127, 1.817)	3.318 (0.452, 6.755)	2.651 (1.526, 4.66)	5.107 (4.413, 5.805)
