# Supplementary material for: Global Ischemic Stroke Burden Due to High BMI, 1990–2021: An Age-Period-Cohort Study and Future Risk Prediction Using GBD Data
Source: Research Square preprint supplement (doi:10.21203/rs.3.rs-7557435/v1), 2025-09-23
Supplement: Supplementary file 2 [file 22587af48f10c170cbfda600.pdf]

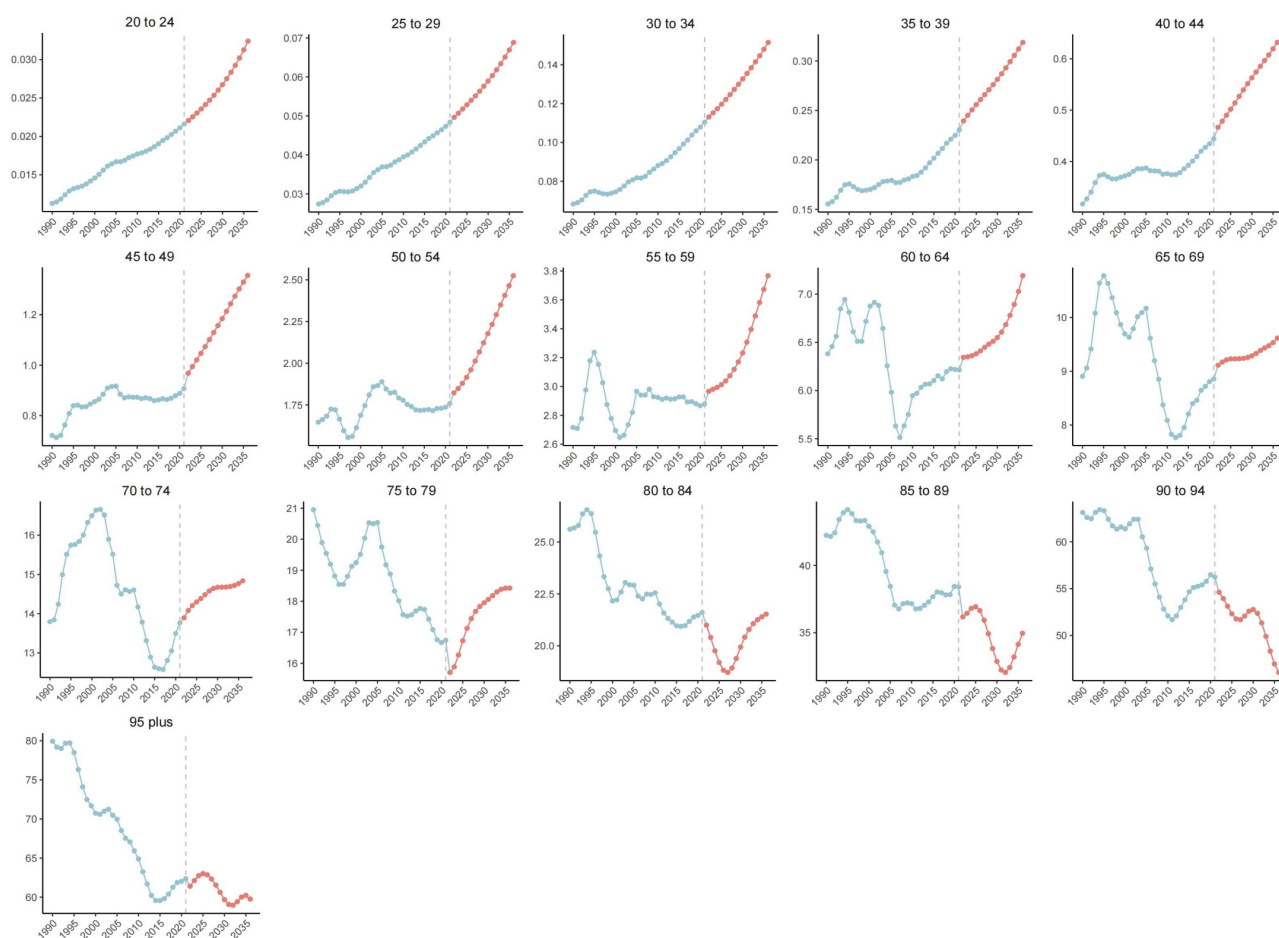

Supplementary Figure 6  
Global predictions of death rates for different age groups of males between 2022 and 2036.
