# Supplementary material for: Global Ischemic Stroke Burden Due to High BMI, 1990–2021: An Age-Period-Cohort Study and Future Risk Prediction Using GBD Data
Source: Research Square preprint supplement (doi:10.21203/rs.3.rs-7557435/v1), 2025-09-23
Supplement: Supplementary file 3 [file 7cb6a900c88790cb6566d4fe.xlsx]

## Sheet: Sheet1
TABLE 1 The disease burden of ischemic stroke related to high body mass index in 1990 and 2021, including death cases, ASMR, PC, and EAPC
location_name	1990		2021		PC (1990–2021)	EAPC_CI (1990–2021)
	the number of deaths	ASMR (per 100,000)	the number of deaths	ASMR (per 100,000)	the number of deaths	ASMR
Global	88074.927 (12636.492, 176366.678)	2.571 (0.366, 5.152)	172390.651 (25064.566, 347912.75)	2.057 (0.298, 4.168)	0.957 (0.809, 1.097)	-1.103 (-1.241, -0.965)
High SDI	24649.398 (3511.372, 50163.531)	2.214 (0.315, 4.496)	26598.735 (3846.088, 56371.586)	1.118 (0.166, 2.297)	0.079 (-0.029, 0.165)	-2.602 (-2.798, -2.406)
High-middle SDI	42915.056 (6201.179, 84869.483)	4.931 (0.706, 9.842)	65696.014 (9544.557, 133497.246)	3.35 (0.486, 6.836)	0.531 (0.359, 0.678)	-1.826 (-2.089, -1.562)
Middle SDI	12041.914 (1665.17, 23761.107)	1.367 (0.189, 2.772)	48873.029 (7106.307, 95822.906)	1.958 (0.282, 3.905)	3.059 (2.529, 3.6)	1.077 (1.025, 1.13)
Low-middle SDI	6734.755 (992.496, 13365.821)	1.286 (0.187, 2.596)	25374.538 (3762.023, 50068.612)	1.925 (0.281, 3.838)	2.768 (2.254, 3.418)	1.426 (1.372, 1.481)
Low SDI	1521.053 (190.645, 2874.121)	0.77 (0.096, 1.478)	5601.167 (718.476, 10617.388)	1.269 (0.163, 2.465)	2.682 (2.196, 3.322)	1.537 (1.476, 1.599)
Andean Latin America	218.427 (31.965, 457.004)	1.128 (0.163, 2.401)	591.128 (85.428, 1175.965)	1.034 (0.148, 2.062)	1.706 (1.151, 2.362)	-0.525 (-0.716, -0.333)
Australasia	427.533 (60.554, 877.332)	1.895 (0.267, 3.944)	548.323 (77.233, 1250.286)	0.852 (0.121, 1.912)	0.283 (0.019, 0.543)	-2.846 (-2.961, -2.731)
Caribbean	380.442 (55.517, 736.602)	1.562 (0.226, 3.041)	1009.589 (147.63, 1999.427)	1.851 (0.271, 3.66)	1.654 (1.285, 2.042)	0.595 (0.519, 0.67)
Central Asia	2107.868 (309.596, 4164.832)	4.88 (0.714, 9.699)	3599.839 (543.63, 7282.831)	5.063 (0.755, 10.317)	0.708 (0.495, 0.96)	-0.435 (-0.768, -0.101)
Central Europe	11118.927 (1638.847, 22500.657)	8.057 (1.178, 16.565)	11172.253 (1637.571, 23362.038)	4.675 (0.688, 9.745)	0.005 (-0.102, 0.112)	-2.13 (-2.291, -1.968)
Central Latin America	1241.361 (184.409, 2445.328)	1.684 (0.247, 3.355)	3189.91 (498.451, 6503.154)	1.332 (0.206, 2.751)	1.57 (1.238, 1.916)	-0.993 (-1.181, -0.804)
Central Sub-Saharan Africa	157.695 (18.522, 323.53)	0.861 (0.099, 1.753)	788.657 (103.573, 1604.988)	1.914 (0.247, 3.944)	4.001 (2.763, 5.49)	2.437 (2.357, 2.517)
East Asia	7432.443 (943.613, 15037.694)	0.983 (0.125, 1.986)	45110.285 (6193.957, 93330.194)	2.166 (0.295, 4.491)	5.069 (3.603, 7.218)	2.639 (2.462, 2.816)
Eastern Europe	25077.429 (3656.289, 49380.023)	9.656 (1.395, 19.223)	26396.619 (3850.065, 52648.747)	7.365 (1.074, 14.654)	0.053 (-0.101, 0.185)	-1.697 (-2.203, -1.189)
Eastern Sub-Saharan Africa	347.044 (40.61, 656.39)	0.552 (0.065, 1.078)	1532.963 (195.898, 3054.341)	1.099 (0.142, 2.248)	3.417 (2.45, 4.591)	2.181 (2.146, 2.216)
High-income Asia Pacific	1529.007 (204.752, 3028.227)	0.847 (0.112, 1.681)	2098.843 (269.598, 4348.509)	0.337 (0.045, 0.678)	0.373 (0.045, 0.757)	-3.428 (-3.598, -3.258)
High-income North America	5637.365 (804.629, 11699.388)	1.53 (0.219, 3.17)	8977.12 (1276.808, 18988.07)	1.236 (0.178, 2.582)	0.592 (0.375, 0.767)	-1.327 (-1.665, -0.989)
North Africa and Middle East	8084.58 (1232.281, 16131.239)	5.501 (0.822, 11.161)	25810.769 (4202.778, 50955.854)	6.463 (1.021, 12.987)	2.193 (1.68, 2.823)	0.511 (0.457, 0.566)
Oceania	36.456 (5.047, 74.554)	1.49 (0.203, 3.18)	101.992 (14.838, 206.121)	1.621 (0.234, 3.403)	1.798 (1.308, 2.458)	0.104 (0.033, 0.174)
South Asia	1685.981 (188.177, 3415.269)	0.338 (0.038, 0.679)	10271.942 (1294.374, 20132.012)	0.755 (0.093, 1.499)	5.093 (3.979, 6.751)	2.625 (2.557, 2.693)
Southeast Asia	1373.199 (179.626, 2604.146)	0.587 (0.077, 1.131)	7689.612 (1037.511, 14915.674)	1.272 (0.168, 2.523)	4.6 (3.518, 5.696)	2.623 (2.478, 2.768)
Southern Latin America	1248.386 (181.188, 2522.93)	2.888 (0.418, 5.896)	1371.528 (200.864, 2886.998)	1.498 (0.22, 3.15)	0.099 (-0.049, 0.261)	-1.836 (-1.961, -1.71)
Southern Sub-Saharan Africa	504.04 (73.486, 989.987)	2.136 (0.311, 4.384)	2085.622 (303.878, 4139.456)	4.429 (0.644, 8.85)	3.138 (2.535, 4.064)	2.552 (2.022, 3.085)
Tropical Latin America	2641.053 (385.611, 5252.063)	3.228 (0.464, 6.64)	4896.409 (708.523, 10016.05)	1.962 (0.283, 4.03)	0.854 (0.613, 1.125)	-1.569 (-1.683, -1.456)
Western Europe	15629.768 (2199.435, 32210.931)	2.594 (0.365, 5.338)	10681.674 (1467.015, 22843.119)	0.891 (0.124, 1.889)	-0.317 (-0.416, -0.239)	-3.681 (-3.832, -3.53)
Western Sub-Saharan Africa	1195.924 (153.77, 2403.601)	1.588 (0.206, 3.272)	4465.574 (605.31, 8727.905)	2.779 (0.368, 5.457)	2.734 (1.929, 3.9)	1.749 (1.639, 1.859)
ASMR, age-standardized mortality rate; PC, percentage change; EAPC, estimated annual percentage change; CI, confidence interval.
