# Supplementary material for: Global Ischemic Stroke Burden Due to High BMI, 1990–2021: An Age-Period-Cohort Study and Future Risk Prediction Using GBD Data
Source: Research Square preprint supplement (doi:10.21203/rs.3.rs-7557435/v1), 2025-09-23
Supplement: Supplementary file 3 [file 3812614328efd20d6ace1214.pdf]

## Supplementary Figure 1-6

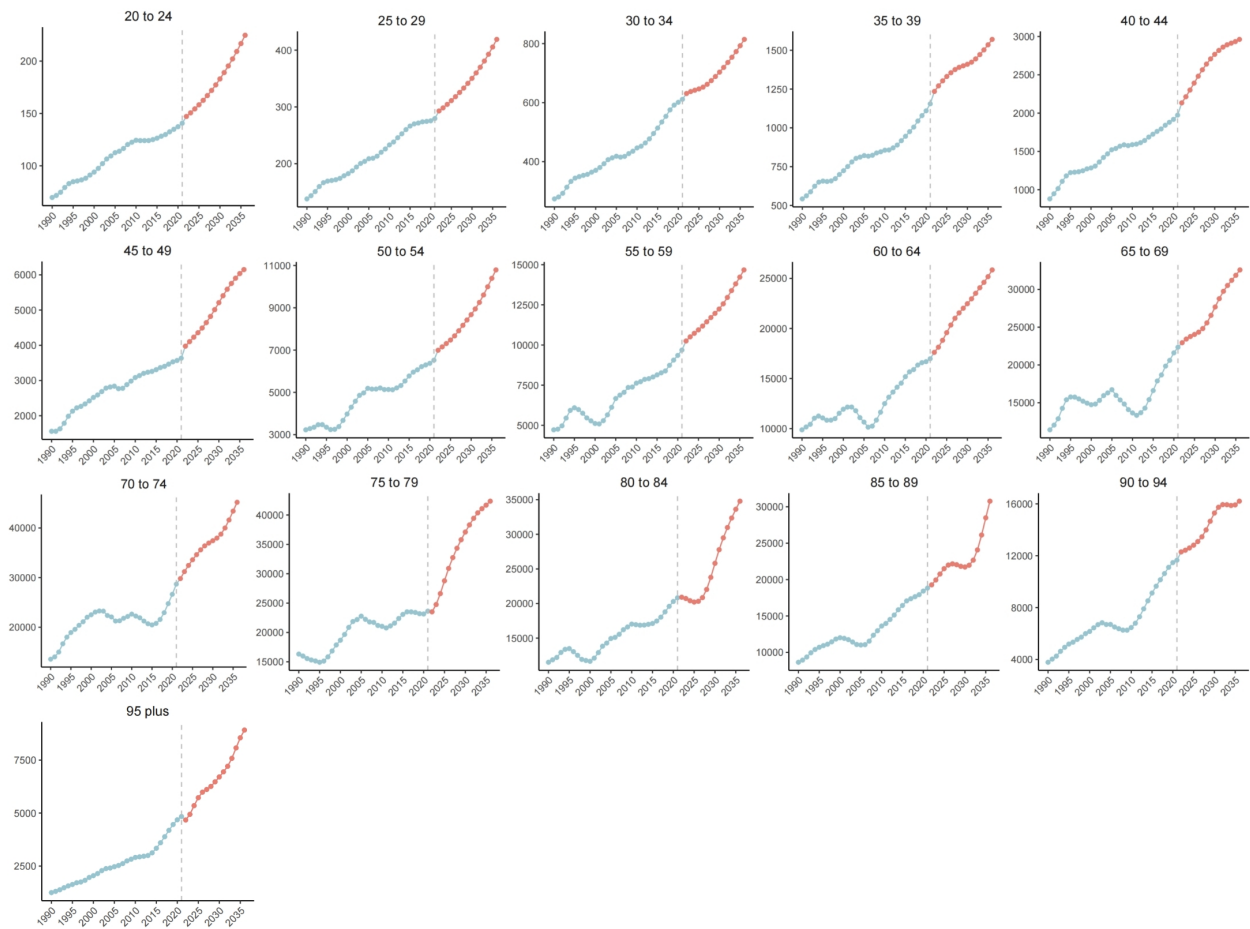

Supplementary Figure 1

Global predictions of death cases for different age groups including males and females between 2022 and 2036.
