# Supplementary material for: Global Ischemic Stroke Burden Due to High BMI, 1990–2021: An Age-Period-Cohort Study and Future Risk Prediction Using GBD Data
Source: Research Square preprint supplement (doi:10.21203/rs.3.rs-7557435/v1), 2025-09-23
Supplement: Supplementary file 4 [file 54ae4a661c00f5bad413347b.pdf]

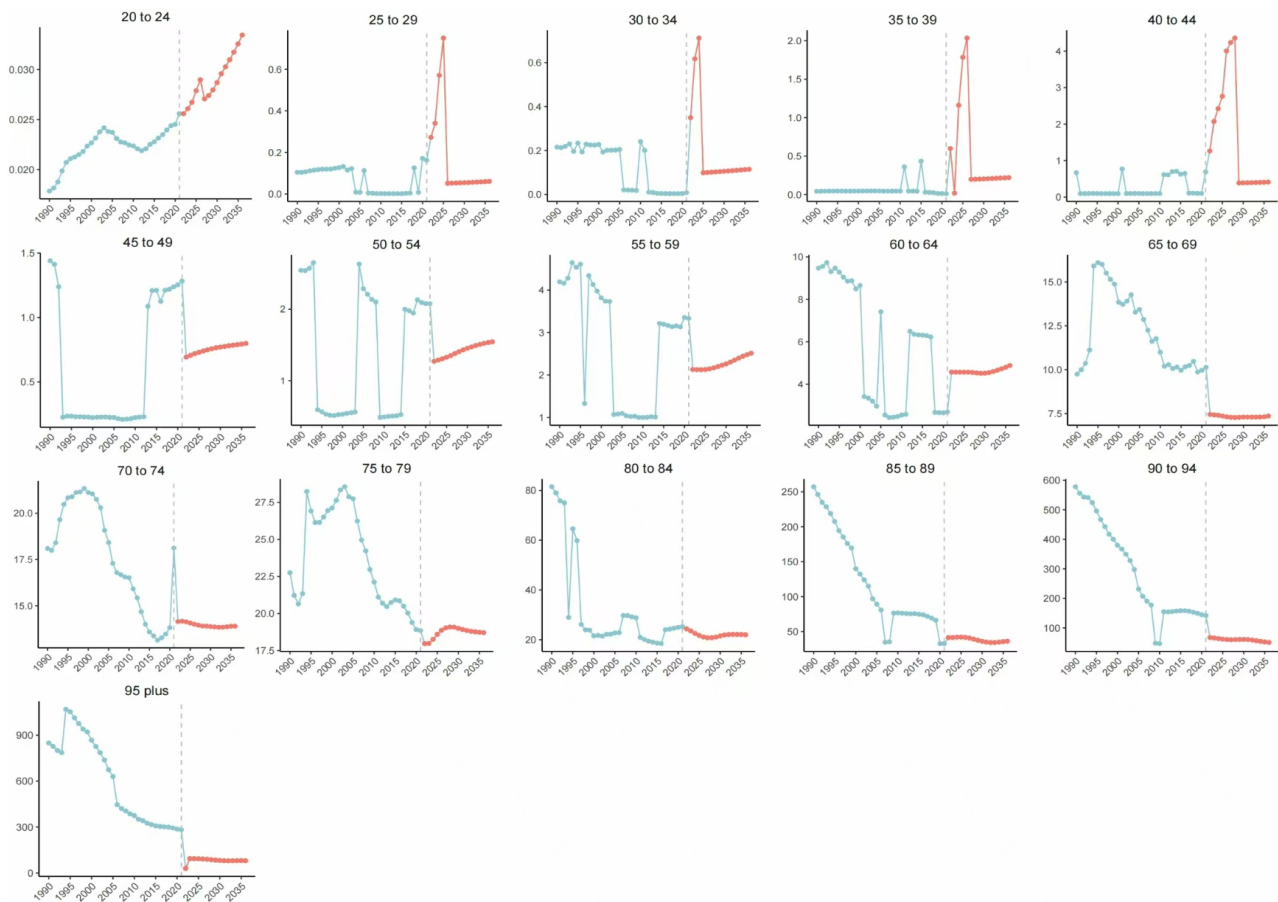

Supplementary Figure 4  
Global predictions of mortality rate for different age groups of females between 2022 and 2036.
