# Supplementary material for: Global Ischemic Stroke Burden Due to High BMI, 1990–2021: An Age-Period-Cohort Study and Future Risk Prediction Using GBD Data
Source: Research Square preprint supplement (doi:10.21203/rs.3.rs-7557435/v1), 2025-09-23
Supplement: Supplementary file 4 [file 887f7f7046cb0d9d0d2839e0.xlsx]

## Sheet: Sheet1
							1990	2021
measure_name	location_name	cause_name	rei_name	metric_name	age_name	sex_name	val_95UI	val_95UI	PC
DALYs (Disability-Adjusted Life Years)	Afghanistan	Ischemic stroke	High body-mass index	Number	All ages	Both	7955.175 (1034.199, 15684.184)	17127.854 (2769.568, 36379.037)	1.153 (0.576, 2.124)
DALYs (Disability-Adjusted Life Years)	Albania	Ischemic stroke	High body-mass index	Number	All ages	Both	1150.794 (170.096, 2351.555)	2336.709 (329.333, 4958.398)	1.031 (0.502, 1.735)
DALYs (Disability-Adjusted Life Years)	Algeria	Ischemic stroke	High body-mass index	Number	All ages	Both	9952.079 (1401.697, 20599.831)	38622.785 (6254.589, 77134.912)	2.881 (1.956, 4.213)
DALYs (Disability-Adjusted Life Years)	American Samoa	Ischemic stroke	High body-mass index	Number	All ages	Both	23.617 (4.011, 41.913)	45.036 (7.848, 79.476)	0.907 (0.597, 1.287)
DALYs (Disability-Adjusted Life Years)	Andorra	Ischemic stroke	High body-mass index	Number	All ages	Both	13.079 (1.982, 27.313)	24.192 (3.653, 48.798)	0.85 (0.309, 1.501)
DALYs (Disability-Adjusted Life Years)	Angola	Ischemic stroke	High body-mass index	Number	All ages	Both	783.205 (99.345, 1527.24)	4944.944 (667.113, 9739.505)	5.314 (3.442, 7.606)
DALYs (Disability-Adjusted Life Years)	Antigua and Barbuda	Ischemic stroke	High body-mass index	Number	All ages	Both	24.361 (3.661, 48.563)	45.947 (7.148, 89.802)	0.886 (0.594, 1.211)
DALYs (Disability-Adjusted Life Years)	Argentina	Ischemic stroke	High body-mass index	Number	All ages	Both	19414.927 (2818.434, 37896.341)	20344.655 (2998.746, 41136.953)	0.048 (-0.086, 0.205)
DALYs (Disability-Adjusted Life Years)	Armenia	Ischemic stroke	High body-mass index	Number	All ages	Both	2988.99 (456.198, 5845.463)	3833.704 (608.905, 7536.637)	0.283 (0.115, 0.482)
DALYs (Disability-Adjusted Life Years)	Australia	Ischemic stroke	High body-mass index	Number	All ages	Both	7384.228 (1040.493, 14548.054)	9868.565 (1457.184, 20083.235)	0.336 (0.126, 0.56)
DALYs (Disability-Adjusted Life Years)	Austria	Ischemic stroke	High body-mass index	Number	All ages	Both	6432.707 (891.313, 13175.937)	3712.609 (505.7, 7850.856)	-0.423 (-0.512, -0.329)
DALYs (Disability-Adjusted Life Years)	Azerbaijan	Ischemic stroke	High body-mass index	Number	All ages	Both	3779.51 (520.658, 7714.307)	7539.61 (1173.604, 15365.451)	0.995 (0.466, 1.757)
DALYs (Disability-Adjusted Life Years)	Bahamas	Ischemic stroke	High body-mass index	Number	All ages	Both	76.175 (11.821, 148.364)	192.137 (29.149, 362.01)	1.522 (0.987, 2.18)
DALYs (Disability-Adjusted Life Years)	Bahrain	Ischemic stroke	High body-mass index	Number	All ages	Both	189.797 (28.597, 363.053)	864.611 (151.651, 1657.427)	3.555 (2.728, 4.773)
DALYs (Disability-Adjusted Life Years)	Bangladesh	Ischemic stroke	High body-mass index	Number	All ages	Both	4084.63 (495.649, 8558.502)	29342.509 (3950.127, 61779.291)	6.184 (4.04, 9.088)
DALYs (Disability-Adjusted Life Years)	Barbados	Ischemic stroke	High body-mass index	Number	All ages	Both	179.289 (26.093, 348.859)	310.586 (49.081, 627.423)	0.732 (0.334, 1.249)
DALYs (Disability-Adjusted Life Years)	Belarus	Ischemic stroke	High body-mass index	Number	All ages	Both	19897.577 (2890.157, 39404.031)	23466.708 (3428.49, 45213.463)	0.179 (-0.019, 0.425)
DALYs (Disability-Adjusted Life Years)	Belgium	Ischemic stroke	High body-mass index	Number	All ages	Both	5746.148 (820.464, 11173.683)	4418.487 (627.037, 8902.738)	-0.231 (-0.346, -0.085)
DALYs (Disability-Adjusted Life Years)	Belize	Ischemic stroke	High body-mass index	Number	All ages	Both	34.31 (5.133, 67.764)	132.056 (22.004, 247.575)	2.849 (2.181, 3.642)
DALYs (Disability-Adjusted Life Years)	Benin	Ischemic stroke	High body-mass index	Number	All ages	Both	974.825 (126.848, 1901.484)	3567.16 (504.362, 7251.968)	2.659 (1.759, 3.939)
DALYs (Disability-Adjusted Life Years)	Bermuda	Ischemic stroke	High body-mass index	Number	All ages	Both	34.698 (5.145, 70.385)	47.296 (7.694, 95.147)	0.363 (0.1, 0.729)
DALYs (Disability-Adjusted Life Years)	Bhutan	Ischemic stroke	High body-mass index	Number	All ages	Both	72.176 (10.139, 146.595)	208.374 (31.535, 446.609)	1.887 (1.066, 3.074)
DALYs (Disability-Adjusted Life Years)	Bolivia (Plurinational State of)	Ischemic stroke	High body-mass index	Number	All ages	Both	1267.611 (173.336, 2597.528)	3240.855 (471.322, 6820.987)	1.557 (0.871, 2.682)
DALYs (Disability-Adjusted Life Years)	Bosnia and Herzegovina	Ischemic stroke	High body-mass index	Number	All ages	Both	5860.21 (853.635, 11918.229)	8205.47 (1245.716, 16778.928)	0.4 (0.072, 0.832)
DALYs (Disability-Adjusted Life Years)	Botswana	Ischemic stroke	High body-mass index	Number	All ages	Both	274.224 (35.062, 535.326)	1058.014 (145.049, 1996.32)	2.858 (1.764, 4.59)
DALYs (Disability-Adjusted Life Years)	Brazil	Ischemic stroke	High body-mass index	Number	All ages	Both	67971.202 (10054.317, 131209.682)	111506.46 (16354.099, 219070.092)	0.64 (0.474, 0.832)
DALYs (Disability-Adjusted Life Years)	Brunei Darussalam	Ischemic stroke	High body-mass index	Number	All ages	Both	39.279 (5.4, 73.511)	127.754 (19.059, 239.934)	2.252 (1.542, 3.177)
DALYs (Disability-Adjusted Life Years)	Bulgaria	Ischemic stroke	High body-mass index	Number	All ages	Both	24095.611 (3556.359, 48011.244)	30686.473 (4663.584, 62664.252)	0.274 (0.079, 0.486)
DALYs (Disability-Adjusted Life Years)	Burkina Faso	Ischemic stroke	High body-mass index	Number	All ages	Both	513.169 (71.591, 1034.002)	1763.64 (223.129, 3615.453)	2.437 (1.428, 3.974)
DALYs (Disability-Adjusted Life Years)	Burundi	Ischemic stroke	High body-mass index	Number	All ages	Both	423.622 (46.846, 886.547)	821.071 (105.73, 1640.318)	0.938 (0.351, 1.812)
DALYs (Disability-Adjusted Life Years)	Cabo Verde	Ischemic stroke	High body-mass index	Number	All ages	Both	65.851 (8.505, 128.175)	312.809 (50.079, 606.116)	3.75 (2.607, 5.438)
DALYs (Disability-Adjusted Life Years)	Cambodia	Ischemic stroke	High body-mass index	Number	All ages	Both	620.151 (81.632, 1189.8)	2553.745 (384.439, 4988.513)	3.118 (1.953, 4.77)
DALYs (Disability-Adjusted Life Years)	Cameroon	Ischemic stroke	High body-mass index	Number	All ages	Both	2566.804 (319.937, 5074.974)	14230.198 (2117.394, 28222.889)	4.544 (3.068, 6.885)
DALYs (Disability-Adjusted Life Years)	Canada	Ischemic stroke	High body-mass index	Number	All ages	Both	11911.053 (1730.865, 23927.108)	16904.201 (2449.903, 34511.008)	0.419 (0.234, 0.606)
DALYs (Disability-Adjusted Life Years)	Central African Republic	Ischemic stroke	High body-mass index	Number	All ages	Both	245.263 (28.402, 489.153)	913.567 (117.062, 1952.412)	2.725 (1.621, 4.164)
DALYs (Disability-Adjusted Life Years)	Chad	Ischemic stroke	High body-mass index	Number	All ages	Both	772.519 (97.269, 1591.652)	2678.545 (344.848, 5576.802)	2.467 (1.486, 3.854)
DALYs (Disability-Adjusted Life Years)	Chile	Ischemic stroke	High body-mass index	Number	All ages	Both	6862.842 (999.875, 13631.782)	9988.038 (1462.602, 19596.352)	0.455 (0.299, 0.627)
DALYs (Disability-Adjusted Life Years)	China	Ischemic stroke	High body-mass index	Number	All ages	Both	211604.284 (26608.998, 430285.069)	1188225.26 (166008.286, 2395996.3)	4.615 (3.479, 6.309)
DALYs (Disability-Adjusted Life Years)	Colombia	Ischemic stroke	High body-mass index	Number	All ages	Both	6415.2 (927.718, 12395.055)	12863.049 (1935.331, 26075.904)	1.005 (0.659, 1.417)
DALYs (Disability-Adjusted Life Years)	Comoros	Ischemic stroke	High body-mass index	Number	All ages	Both	49.945 (5.993, 100.659)	206.836 (29.016, 406.419)	3.141 (1.992, 4.832)
DALYs (Disability-Adjusted Life Years)	Congo	Ischemic stroke	High body-mass index	Number	All ages	Both	418.055 (48.455, 841.331)	1937.955 (264.136, 3735.074)	3.636 (2.418, 5.316)
DALYs (Disability-Adjusted Life Years)	Cook Islands	Ischemic stroke	High body-mass index	Number	All ages	Both	11.088 (1.69, 20.625)	17.061 (2.815, 32.576)	0.539 (0.245, 0.96)
DALYs (Disability-Adjusted Life Years)	Costa Rica	Ischemic stroke	High body-mass index	Number	All ages	Both	477.515 (70.023, 945.298)	1274.057 (198.998, 2528.833)	1.668 (1.314, 2.094)
DALYs (Disability-Adjusted Life Years)	Cote d'Ivoire	Ischemic stroke	High body-mass index	Number	All ages	Both	2258.085 (291.944, 4382.898)	10111.468 (1355.753, 19794.313)	3.478 (2.255, 5.28)
DALYs (Disability-Adjusted Life Years)	Croatia	Ischemic stroke	High body-mass index	Number	All ages	Both	8120.961 (1156.802, 16172.308)	6330.294 (947.269, 13228.841)	-0.22 (-0.335, -0.077)
DALYs (Disability-Adjusted Life Years)	Cuba	Ischemic stroke	High body-mass index	Number	All ages	Both	3291.853 (505.068, 6164.371)	8563.177 (1265.563, 16636.402)	1.601 (1.083, 2.158)
DALYs (Disability-Adjusted Life Years)	Cyprus	Ischemic stroke	High body-mass index	Number	All ages	Both	277.576 (40.758, 537.859)	412.182 (63.2, 859.013)	0.485 (0.09, 1.003)
DALYs (Disability-Adjusted Life Years)	Czechia	Ischemic stroke	High body-mass index	Number	All ages	Both	29612.476 (4442.365, 58964.071)	11674.43 (1762.577, 23792.874)	-0.606 (-0.658, -0.545)
DALYs (Disability-Adjusted Life Years)	Democratic People's Republic of Korea	Ischemic stroke	High body-mass index	Number	All ages	Both	2733.098 (341.124, 5927.243)	13607.753 (1746.413, 30207.903)	3.979 (2.583, 6.158)
DALYs (Disability-Adjusted Life Years)	Democratic Republic of the Congo	Ischemic stroke	High body-mass index	Number	All ages	Both	3126.343 (361.097, 6459.264)	15312.619 (1988.986, 32290.809)	3.898 (2.564, 5.719)
DALYs (Disability-Adjusted Life Years)	Denmark	Ischemic stroke	High body-mass index	Number	All ages	Both	3128.384 (445.249, 6118.665)	2272.387 (322.838, 4644.775)	-0.274 (-0.374, -0.162)
DALYs (Disability-Adjusted Life Years)	Djibouti	Ischemic stroke	High body-mass index	Number	All ages	Both	14.893 (1.746, 32.486)	128.504 (16.284, 254.704)	7.628 (5.056, 11.265)
DALYs (Disability-Adjusted Life Years)	Dominica	Ischemic stroke	High body-mass index	Number	All ages	Both	44.46 (6.381, 86.042)	70.843 (11.292, 137.453)	0.593 (0.287, 0.99)
DALYs (Disability-Adjusted Life Years)	Dominican Republic	Ischemic stroke	High body-mass index	Number	All ages	Both	1055.987 (144.123, 2093.875)	4919.19 (766.657, 9739.894)	3.658 (2.471, 5.264)
DALYs (Disability-Adjusted Life Years)	Ecuador	Ischemic stroke	High body-mass index	Number	All ages	Both	2278.622 (339.547, 4455.887)	5114.34 (769.311, 9849.718)	1.244 (0.734, 1.898)
DALYs (Disability-Adjusted Life Years)	Egypt	Ischemic stroke	High body-mass index	Number	All ages	Both	67138.571 (10516.743, 140158.995)	218926.069 (39537.026, 405524.563)	2.261 (1.437, 3.511)
DALYs (Disability-Adjusted Life Years)	El Salvador	Ischemic stroke	High body-mass index	Number	All ages	Both	1039.186 (151.046, 2029.735)	1882.963 (280.922, 3754.407)	0.812 (0.407, 1.294)
DALYs (Disability-Adjusted Life Years)	Equatorial Guinea	Ischemic stroke	High body-mass index	Number	All ages	Both	78.565 (10.188, 157.709)	360.501 (49.943, 701.297)	3.589 (1.976, 6.109)
DALYs (Disability-Adjusted Life Years)	Eritrea	Ischemic stroke	High body-mass index	Number	All ages	Both	125.368 (13.432, 256.696)	508.815 (69.513, 1031.224)	3.059 (1.784, 4.902)
DALYs (Disability-Adjusted Life Years)	Estonia	Ischemic stroke	High body-mass index	Number	All ages	Both	3969.206 (591.454, 7621.261)	1341.561 (188.491, 2686.977)	-0.662 (-0.712, -0.61)
DALYs (Disability-Adjusted Life Years)	Eswatini	Ischemic stroke	High body-mass index	Number	All ages	Both	220.746 (30.17, 411.249)	769.487 (104.041, 1522.247)	2.486 (1.454, 3.94)
DALYs (Disability-Adjusted Life Years)	Ethiopia	Ischemic stroke	High body-mass index	Number	All ages	Both	2035.318 (213.148, 4241.413)	4893.004 (628.947, 9506.954)	1.404 (0.529, 2.417)
DALYs (Disability-Adjusted Life Years)	Fiji	Ischemic stroke	High body-mass index	Number	All ages	Both	304.757 (44.815, 594.427)	748.303 (128.32, 1394.6)	1.455 (0.923, 2.272)
DALYs (Disability-Adjusted Life Years)	Finland	Ischemic stroke	High body-mass index	Number	All ages	Both	4289.47 (611.999, 8657.176)	3447.821 (493.23, 6927.405)	-0.196 (-0.311, -0.073)
DALYs (Disability-Adjusted Life Years)	France	Ischemic stroke	High body-mass index	Number	All ages	Both	21354.883 (3040.83, 41522.317)	24537.952 (3399.331, 50321.127)	0.149 (-0.043, 0.355)
DALYs (Disability-Adjusted Life Years)	Gabon	Ischemic stroke	High body-mass index	Number	All ages	Both	302.964 (38.122, 573.594)	867.249 (129.939, 1653.861)	1.863 (1.157, 2.793)
DALYs (Disability-Adjusted Life Years)	Gambia	Ischemic stroke	High body-mass index	Number	All ages	Both	194.947 (24.931, 379.249)	902.299 (120.807, 1836.976)	3.628 (2.391, 5.705)
DALYs (Disability-Adjusted Life Years)	Georgia	Ischemic stroke	High body-mass index	Number	All ages	Both	5681.395 (840.198, 11409.279)	7704.711 (1096.658, 15268.863)	0.356 (0.097, 0.733)
DALYs (Disability-Adjusted Life Years)	Germany	Ischemic stroke	High body-mass index	Number	All ages	Both	87388.695 (12328.27, 171777.166)	55007.173 (7681.654, 112072.375)	-0.371 (-0.45, -0.285)
DALYs (Disability-Adjusted Life Years)	Ghana	Ischemic stroke	High body-mass index	Number	All ages	Both	3262.616 (410.284, 6349.719)	19746.819 (2716.085, 38256.497)	5.052 (3.35, 7.38)
DALYs (Disability-Adjusted Life Years)	Greece	Ischemic stroke	High body-mass index	Number	All ages	Both	9375.333 (1306.122, 19151.227)	8391.593 (1220.329, 17969.09)	-0.105 (-0.291, 0.082)
DALYs (Disability-Adjusted Life Years)	Greenland	Ischemic stroke	High body-mass index	Number	All ages	Both	35.617 (5.199, 70.218)	31.135 (4.901, 62.26)	-0.126 (-0.29, 0.077)
DALYs (Disability-Adjusted Life Years)	Grenada	Ischemic stroke	High body-mass index	Number	All ages	Both	55.634 (8.001, 108.968)	64.541 (9.025, 125.383)	0.16 (-0.069, 0.42)
DALYs (Disability-Adjusted Life Years)	Guam	Ischemic stroke	High body-mass index	Number	All ages	Both	51.994 (7.896, 100.117)	103.177 (16.386, 201.248)	0.984 (0.675, 1.335)
DALYs (Disability-Adjusted Life Years)	Guatemala	Ischemic stroke	High body-mass index	Number	All ages	Both	1080.207 (169.982, 2044.977)	2796.57 (428.117, 5486.526)	1.589 (1.123, 2.182)
DALYs (Disability-Adjusted Life Years)	Guinea	Ischemic stroke	High body-mass index	Number	All ages	Both	1078.681 (132.932, 2113.385)	3323.621 (452.221, 6504.721)	2.081 (1.19, 3.423)
DALYs (Disability-Adjusted Life Years)	Guinea-Bissau	Ischemic stroke	High body-mass index	Number	All ages	Both	211.217 (28.186, 433.867)	679.592 (98.677, 1346.121)	2.218 (1.314, 3.585)
DALYs (Disability-Adjusted Life Years)	Guyana	Ischemic stroke	High body-mass index	Number	All ages	Both	418.745 (59.561, 822.896)	568.43 (87.089, 1128.371)	0.357 (0.026, 0.747)
DALYs (Disability-Adjusted Life Years)	Haiti	Ischemic stroke	High body-mass index	Number	All ages	Both	1039.356 (131.199, 2078.023)	3524.138 (445.384, 7259.302)	2.391 (1.326, 3.992)
DALYs (Disability-Adjusted Life Years)	Honduras	Ischemic stroke	High body-mass index	Number	All ages	Both	847.557 (112.86, 1700.977)	4096.718 (591.798, 8306.535)	3.834 (2.672, 5.325)
DALYs (Disability-Adjusted Life Years)	Hungary	Ischemic stroke	High body-mass index	Number	All ages	Both	30656.981 (4697.75, 59277.973)	16903.651 (2531.58, 32434.79)	-0.449 (-0.532, -0.363)
DALYs (Disability-Adjusted Life Years)	Iceland	Ischemic stroke	High body-mass index	Number	All ages	Both	122.279 (17.961, 243.406)	108.812 (15.286, 221.323)	-0.11 (-0.229, 0.014)
DALYs (Disability-Adjusted Life Years)	India	Ischemic stroke	High body-mass index	Number	All ages	Both	37092.455 (4095.997, 72894.846)	207841.567 (25167.16, 403818.132)	4.603 (3.473, 6.019)
DALYs (Disability-Adjusted Life Years)	Indonesia	Ischemic stroke	High body-mass index	Number	All ages	Both	17368.294 (2171.009, 34517.945)	117102.226 (15955.341, 231236.909)	5.742 (4.242, 7.74)
DALYs (Disability-Adjusted Life Years)	Iran (Islamic Republic of)	Ischemic stroke	High body-mass index	Number	All ages	Both	26420.826 (3912.958, 49513.443)	79759.252 (12685.065, 150755.409)	2.019 (1.408, 2.7)
DALYs (Disability-Adjusted Life Years)	Iraq	Ischemic stroke	High body-mass index	Number	All ages	Both	19956.028 (2989.43, 38299.651)	58388.062 (9723.818, 114456.67)	1.926 (1.163, 2.922)
DALYs (Disability-Adjusted Life Years)	Ireland	Ischemic stroke	High body-mass index	Number	All ages	Both	1898.306 (275.222, 3834.076)	1243.509 (176.511, 2581.97)	-0.345 (-0.452, -0.22)
DALYs (Disability-Adjusted Life Years)	Israel	Ischemic stroke	High body-mass index	Number	All ages	Both	1740.991 (255.943, 3470.264)	2039.935 (294.417, 4120.478)	0.172 (0.01, 0.354)
DALYs (Disability-Adjusted Life Years)	Italy	Ischemic stroke	High body-mass index	Number	All ages	Both	36301.424 (5241.669, 71634.802)	28439.408 (3970.832, 59215.261)	-0.217 (-0.354, -0.072)
DALYs (Disability-Adjusted Life Years)	Jamaica	Ischemic stroke	High body-mass index	Number	All ages	Both	985.026 (141.056, 1881.261)	1905.814 (303.581, 3778.89)	0.935 (0.469, 1.609)
DALYs (Disability-Adjusted Life Years)	Japan	Ischemic stroke	High body-mass index	Number	All ages	Both	28576.662 (3820.802, 54804.037)	33806.033 (4467.503, 65416.603)	0.183 (0.003, 0.388)
DALYs (Disability-Adjusted Life Years)	Jordan	Ischemic stroke	High body-mass index	Number	All ages	Both	2828.9 (442.046, 5344.126)	10723.291 (1815.191, 20129.759)	2.791 (1.98, 4.095)
DALYs (Disability-Adjusted Life Years)	Kazakhstan	Ischemic stroke	High body-mass index	Number	All ages	Both	21828.779 (3299.135, 43424.191)	27433.087 (4078.803, 54241.927)	0.257 (0.041, 0.517)
DALYs (Disability-Adjusted Life Years)	Kenya	Ischemic stroke	High body-mass index	Number	All ages	Both	1201.106 (150.827, 2290.827)	7408.024 (987.184, 14184.271)	5.168 (4.024, 6.662)
DALYs (Disability-Adjusted Life Years)	Kiribati	Ischemic stroke	High body-mass index	Number	All ages	Both	37.165 (5.984, 71.505)	102.721 (17.872, 190.859)	1.764 (1.187, 2.623)
DALYs (Disability-Adjusted Life Years)	Kuwait	Ischemic stroke	High body-mass index	Number	All ages	Both	574.428 (90.414, 1039.483)	2967.954 (505.313, 5407.427)	4.167 (3.395, 5.29)
DALYs (Disability-Adjusted Life Years)	Kyrgyzstan	Ischemic stroke	High body-mass index	Number	All ages	Both	4832.394 (735.474, 9305.233)	7317.56 (1208.357, 13953.785)	0.514 (0.275, 0.844)
DALYs (Disability-Adjusted Life Years)	Lao People's Democratic Republic	Ischemic stroke	High body-mass index	Number	All ages	Both	547.515 (70.132, 1103.783)	1855.843 (236.556, 3694.783)	2.39 (1.279, 4.101)
DALYs (Disability-Adjusted Life Years)	Latvia	Ischemic stroke	High body-mass index	Number	All ages	Both	7402.931 (1142.422, 14754.804)	5745.256 (835.423, 11640.594)	-0.224 (-0.332, -0.111)
DALYs (Disability-Adjusted Life Years)	Lebanon	Ischemic stroke	High body-mass index	Number	All ages	Both	2285.37 (312.95, 4695.66)	3903.7 (621.743, 7557.399)	0.708 (0.224, 1.307)
DALYs (Disability-Adjusted Life Years)	Lesotho	Ischemic stroke	High body-mass index	Number	All ages	Both	396.818 (59.227, 804.886)	1260.73 (197.286, 2577.35)	2.177 (1.21, 3.652)
DALYs (Disability-Adjusted Life Years)	Liberia	Ischemic stroke	High body-mass index	Number	All ages	Both	776.397 (102.982, 1538.441)	2395.34 (352.698, 4730.338)	2.085 (1.293, 3.215)
DALYs (Disability-Adjusted Life Years)	Libya	Ischemic stroke	High body-mass index	Number	All ages	Both	1508.044 (231.207, 3022.211)	9511.528 (1583.129, 17881.222)	5.307 (3.804, 7.688)
DALYs (Disability-Adjusted Life Years)	Lithuania	Ischemic stroke	High body-mass index	Number	All ages	Both	5312.016 (805.456, 10574.806)	5616.055 (805.743, 11437.505)	0.057 (-0.103, 0.214)
DALYs (Disability-Adjusted Life Years)	Luxembourg	Ischemic stroke	High body-mass index	Number	All ages	Both	372.998 (51.368, 729.498)	194.821 (28.802, 399.675)	-0.478 (-0.552, -0.395)
DALYs (Disability-Adjusted Life Years)	Madagascar	Ischemic stroke	High body-mass index	Number	All ages	Both	1009.43 (128.937, 1927.061)	4403.242 (593.027, 8728.092)	3.362 (2.06, 5.056)
DALYs (Disability-Adjusted Life Years)	Malawi	Ischemic stroke	High body-mass index	Number	All ages	Both	606.07 (70.116, 1154.313)	2919.47 (372.112, 5701.684)	3.817 (2.606, 5.588)
DALYs (Disability-Adjusted Life Years)	Malaysia	Ischemic stroke	High body-mass index	Number	All ages	Both	3909.498 (557.938, 7380.805)	15378.54 (2185.589, 28957.236)	2.934 (2.285, 3.731)
DALYs (Disability-Adjusted Life Years)	Maldives	Ischemic stroke	High body-mass index	Number	All ages	Both	38.711 (4.953, 74.478)	116.368 (16.726, 226.085)	2.006 (1.263, 3.053)
DALYs (Disability-Adjusted Life Years)	Mali	Ischemic stroke	High body-mass index	Number	All ages	Both	994.231 (123.856, 2081.154)	2861.497 (377, 5719.524)	1.878 (1.15, 2.929)
DALYs (Disability-Adjusted Life Years)	Malta	Ischemic stroke	High body-mass index	Number	All ages	Both	170.499 (23.803, 326.719)	159.219 (23.329, 331.571)	-0.066 (-0.237, 0.148)
DALYs (Disability-Adjusted Life Years)	Marshall Islands	Ischemic stroke	High body-mass index	Number	All ages	Both	17.832 (2.626, 35.498)	45.872 (7.345, 90.471)	1.573 (1.031, 2.273)
DALYs (Disability-Adjusted Life Years)	Mauritania	Ischemic stroke	High body-mass index	Number	All ages	Both	922.25 (124.972, 1867.328)	2268.773 (317.634, 4764.162)	1.46 (0.887, 2.3)
DALYs (Disability-Adjusted Life Years)	Mauritius	Ischemic stroke	High body-mass index	Number	All ages	Both	626.944 (86.829, 1183.687)	900.221 (131.996, 1745.226)	0.436 (0.172, 0.76)
DALYs (Disability-Adjusted Life Years)	Mexico	Ischemic stroke	High body-mass index	Number	All ages	Both	19557.958 (2944.31, 37725.094)	42818.67 (7018.983, 80463.011)	1.189 (0.926, 1.471)
DALYs (Disability-Adjusted Life Years)	Micronesia (Federated States of)	Ischemic stroke	High body-mass index	Number	All ages	Both	59.071 (9.494, 112.703)	104.891 (16.943, 199.501)	0.776 (0.366, 1.341)
DALYs (Disability-Adjusted Life Years)	Monaco	Ischemic stroke	High body-mass index	Number	All ages	Both	52.679 (6.975, 106.205)	38.719 (5.969, 80.582)	-0.265 (-0.429, -0.001)
DALYs (Disability-Adjusted Life Years)	Mongolia	Ischemic stroke	High body-mass index	Number	All ages	Both	393.114 (58.061, 783.396)	1112.193 (160.611, 2152.152)	1.829 (1.208, 2.668)
DALYs (Disability-Adjusted Life Years)	Montenegro	Ischemic stroke	High body-mass index	Number	All ages	Both	333.288 (51.031, 678.381)	832.749 (115.081, 1732.864)	1.499 (0.867, 2.26)
DALYs (Disability-Adjusted Life Years)	Morocco	Ischemic stroke	High body-mass index	Number	All ages	Both	15022.592 (1993.927, 32269.188)	53091.679 (8011.788, 104502.614)	2.534 (1.587, 3.768)
DALYs (Disability-Adjusted Life Years)	Mozambique	Ischemic stroke	High body-mass index	Number	All ages	Both	1269.984 (163.868, 2503.093)	6852.762 (926.218, 13894.997)	4.396 (2.802, 6.275)
DALYs (Disability-Adjusted Life Years)	Myanmar	Ischemic stroke	High body-mass index	Number	All ages	Both	6687.181 (920.832, 12874.872)	15724.018 (2178.411, 30841.397)	1.351 (0.67, 2.308)
DALYs (Disability-Adjusted Life Years)	Namibia	Ischemic stroke	High body-mass index	Number	All ages	Both	328.287 (45.19, 652.575)	1226.112 (175.389, 2361.576)	2.735 (1.685, 4.107)
DALYs (Disability-Adjusted Life Years)	Nauru	Ischemic stroke	High body-mass index	Number	All ages	Both	10.876 (1.828, 19.31)	15.964 (2.84, 28.764)	0.468 (0.154, 0.951)
DALYs (Disability-Adjusted Life Years)	Nepal	Ischemic stroke	High body-mass index	Number	All ages	Both	1006.819 (119.206, 2008.484)	3917.07 (478.255, 8072.977)	2.891 (1.53, 5.178)
DALYs (Disability-Adjusted Life Years)	Netherlands	Ischemic stroke	High body-mass index	Number	All ages	Both	7366.008 (1029.409, 14861.483)	7420.298 (1083.658, 14994.915)	0.007 (-0.133, 0.155)
DALYs (Disability-Adjusted Life Years)	New Zealand	Ischemic stroke	High body-mass index	Number	All ages	Both	1746.432 (252.619, 3440.044)	2062.515 (298.469, 4137.426)	0.181 (0.004, 0.338)
DALYs (Disability-Adjusted Life Years)	Nicaragua	Ischemic stroke	High body-mass index	Number	All ages	Both	586.184 (89.299, 1141.378)	1521.812 (247.279, 2983.87)	1.596 (1.109, 2.227)
DALYs (Disability-Adjusted Life Years)	Niger	Ischemic stroke	High body-mass index	Number	All ages	Both	656.287 (74.956, 1372.042)	2317.087 (297.866, 4913.599)	2.531 (1.621, 3.897)
DALYs (Disability-Adjusted Life Years)	Nigeria	Ischemic stroke	High body-mass index	Number	All ages	Both	16582.549 (2144.387, 33575.112)	56009.473 (7880.793, 106521.019)	2.378 (1.44, 4.085)
DALYs (Disability-Adjusted Life Years)	Niue	Ischemic stroke	High body-mass index	Number	All ages	Both	1.902 (0.287, 3.784)	2.226 (0.364, 4.288)	0.171 (-0.061, 0.464)
DALYs (Disability-Adjusted Life Years)	North Macedonia	Ischemic stroke	High body-mass index	Number	All ages	Both	4016.39 (600.817, 7797.014)	7142.207 (1049.852, 14926.542)	0.778 (0.388, 1.251)
DALYs (Disability-Adjusted Life Years)	Northern Mariana Islands	Ischemic stroke	High body-mass index	Number	All ages	Both	18.954 (3.105, 34.777)	41.337 (6.67, 75.863)	1.181 (0.714, 1.719)
DALYs (Disability-Adjusted Life Years)	Norway	Ischemic stroke	High body-mass index	Number	All ages	Both	3017.998 (420.726, 5955.312)	1637.59 (226.892, 3234.282)	-0.457 (-0.527, -0.386)
DALYs (Disability-Adjusted Life Years)	Oman	Ischemic stroke	High body-mass index	Number	All ages	Both	731.064 (101.02, 1466.642)	3076.775 (556.488, 5428.075)	3.209 (2.098, 5.083)
DALYs (Disability-Adjusted Life Years)	Pakistan	Ischemic stroke	High body-mass index	Number	All ages	Both	9621.732 (1141.011, 20339.088)	55147.913 (7737.212, 109314.552)	4.732 (3.346, 6.537)
DALYs (Disability-Adjusted Life Years)	Palau	Ischemic stroke	High body-mass index	Number	All ages	Both	12.991 (2.053, 24.584)	31.332 (4.856, 59.519)	1.412 (0.915, 2.119)
DALYs (Disability-Adjusted Life Years)	Palestine	Ischemic stroke	High body-mass index	Number	All ages	Both	1573.038 (231.902, 3207.683)	4096.993 (704.899, 7502.392)	1.605 (1.047, 2.526)
DALYs (Disability-Adjusted Life Years)	Panama	Ischemic stroke	High body-mass index	Number	All ages	Both	630.527 (89.998, 1282.263)	1715.806 (275.497, 3422.347)	1.721 (1.162, 2.374)
DALYs (Disability-Adjusted Life Years)	Papua New Guinea	Ischemic stroke	High body-mass index	Number	All ages	Both	522.542 (66.109, 1096.1)	1806.751 (253.868, 3892.917)	2.458 (1.549, 3.892)
DALYs (Disability-Adjusted Life Years)	Paraguay	Ischemic stroke	High body-mass index	Number	All ages	Both	1079.075 (158.846, 2133.295)	2914.418 (426.298, 5948.636)	1.701 (1.084, 2.492)
DALYs (Disability-Adjusted Life Years)	Peru	Ischemic stroke	High body-mass index	Number	All ages	Both	2869.946 (430.634, 5962.176)	7501.895 (1155.176, 14807.682)	1.614 (0.961, 2.383)
DALYs (Disability-Adjusted Life Years)	Philippines	Ischemic stroke	High body-mass index	Number	All ages	Both	5900.449 (776.945, 11666.927)	33689.742 (4444.399, 65943.232)	4.71 (3.754, 6.004)
DALYs (Disability-Adjusted Life Years)	Poland	Ischemic stroke	High body-mass index	Number	All ages	Both	60328.973 (8942.165, 120066.175)	47402.457 (7176.709, 96542.974)	-0.214 (-0.304, -0.113)
DALYs (Disability-Adjusted Life Years)	Portugal	Ischemic stroke	High body-mass index	Number	All ages	Both	13073.212 (1757.744, 26283.281)	6991.551 (975.672, 14952.769)	-0.465 (-0.559, -0.362)
DALYs (Disability-Adjusted Life Years)	Puerto Rico	Ischemic stroke	High body-mass index	Number	All ages	Both	1177.233 (180.102, 2355.307)	1351.133 (213.826, 2670.016)	0.148 (-0.028, 0.354)
DALYs (Disability-Adjusted Life Years)	Qatar	Ischemic stroke	High body-mass index	Number	All ages	Both	142.282 (22.833, 272.534)	973.995 (173.386, 1802.867)	5.846 (4.51, 7.963)
DALYs (Disability-Adjusted Life Years)	Republic of Korea	Ischemic stroke	High body-mass index	Number	All ages	Both	9368.014 (1264.804, 19482.788)	14267.387 (1948.351, 28428.091)	0.523 (0.127, 1.106)
DALYs (Disability-Adjusted Life Years)	Republic of Moldova	Ischemic stroke	High body-mass index	Number	All ages	Both	4338.273 (661.699, 8419.784)	7470.674 (1137.515, 14125.712)	0.722 (0.456, 1.037)
DALYs (Disability-Adjusted Life Years)	Romania	Ischemic stroke	High body-mass index	Number	All ages	Both	42396.282 (6258.804, 82789.495)	47907.13 (6692.72, 96980.878)	0.13 (-0.046, 0.337)
DALYs (Disability-Adjusted Life Years)	Russian Federation	Ischemic stroke	High body-mass index	Number	All ages	Both	391760.471 (57931.824, 753635.627)	417060.734 (61374.648, 815069.715)	0.065 (-0.091, 0.189)
DALYs (Disability-Adjusted Life Years)	Rwanda	Ischemic stroke	High body-mass index	Number	All ages	Both	664.669 (87.015, 1293.528)	1330.66 (179.643, 2717.005)	1.002 (0.362, 1.941)
DALYs (Disability-Adjusted Life Years)	Saint Kitts and Nevis	Ischemic stroke	High body-mass index	Number	All ages	Both	42.114 (5.709, 84.166)	62.143 (9.879, 118.501)	0.476 (0.195, 0.901)
DALYs (Disability-Adjusted Life Years)	Saint Lucia	Ischemic stroke	High body-mass index	Number	All ages	Both	61.784 (9.239, 119.388)	121.419 (18.551, 241.351)	0.965 (0.537, 1.425)
DALYs (Disability-Adjusted Life Years)	Saint Vincent and the Grenadines	Ischemic stroke	High body-mass index	Number	All ages	Both	29.194 (4.022, 55.269)	61.89 (9.324, 120.774)	1.12 (0.724, 1.637)
DALYs (Disability-Adjusted Life Years)	Samoa	Ischemic stroke	High body-mass index	Number	All ages	Both	84.183 (13.988, 159.508)	162.914 (28.256, 297.588)	0.935 (0.567, 1.466)
DALYs (Disability-Adjusted Life Years)	San Marino	Ischemic stroke	High body-mass index	Number	All ages	Both	14.915 (2.19, 30.344)	16.465 (2.319, 35.285)	0.104 (-0.178, 0.426)
DALYs (Disability-Adjusted Life Years)	Sao Tome and Principe	Ischemic stroke	High body-mass index	Number	All ages	Both	33.967 (4.435, 68.02)	115.855 (16.706, 218.529)	2.411 (1.627, 3.45)
DALYs (Disability-Adjusted Life Years)	Saudi Arabia	Ischemic stroke	High body-mass index	Number	All ages	Both	9121.53 (1361.351, 17869.032)	46662.62 (8594.583, 86360.013)	4.116 (2.69, 6.702)
DALYs (Disability-Adjusted Life Years)	Senegal	Ischemic stroke	High body-mass index	Number	All ages	Both	1703.711 (224.895, 3240.858)	5324.851 (747.427, 10233.686)	2.125 (1.414, 3.055)
DALYs (Disability-Adjusted Life Years)	Serbia	Ischemic stroke	High body-mass index	Number	All ages	Both	20860.706 (3232.508, 43089.606)	30387.745 (4550.782, 60424.751)	0.457 (0.126, 0.835)
DALYs (Disability-Adjusted Life Years)	Seychelles	Ischemic stroke	High body-mass index	Number	All ages	Both	32.235 (4.602, 60.996)	84.493 (13.417, 156.518)	1.621 (1.185, 2.129)
DALYs (Disability-Adjusted Life Years)	Sierra Leone	Ischemic stroke	High body-mass index	Number	All ages	Both	771.297 (99.775, 1517.818)	2545.252 (338.848, 4967.836)	2.3 (1.514, 3.488)
DALYs (Disability-Adjusted Life Years)	Singapore	Ischemic stroke	High body-mass index	Number	All ages	Both	519.664 (68.03, 997.599)	1007.392 (142.856, 1948.928)	0.939 (0.533, 1.375)
DALYs (Disability-Adjusted Life Years)	Slovakia	Ischemic stroke	High body-mass index	Number	All ages	Both	9751.177 (1427.656, 19068.212)	9069.586 (1361.979, 17702.979)	-0.07 (-0.246, 0.149)
DALYs (Disability-Adjusted Life Years)	Slovenia	Ischemic stroke	High body-mass index	Number	All ages	Both	2765.69 (400.208, 5409.162)	1742.504 (247.858, 3659.569)	-0.37 (-0.476, -0.276)
DALYs (Disability-Adjusted Life Years)	Solomon Islands	Ischemic stroke	High body-mass index	Number	All ages	Both	75.592 (10.113, 155.838)	272.969 (40.135, 550.121)	2.611 (1.762, 3.895)
DALYs (Disability-Adjusted Life Years)	Somalia	Ischemic stroke	High body-mass index	Number	All ages	Both	457.421 (51.786, 976.093)	1572.559 (193.739, 3339.907)	2.438 (1.557, 3.552)
DALYs (Disability-Adjusted Life Years)	South Africa	Ischemic stroke	High body-mass index	Number	All ages	Both	14042.675 (2127.564, 26981.946)	45872.455 (6962.781, 88595.68)	2.267 (1.875, 2.761)
DALYs (Disability-Adjusted Life Years)	South Sudan	Ischemic stroke	High body-mass index	Number	All ages	Both	230.461 (27.4, 468.942)	486.564 (60.282, 970.821)	1.111 (0.51, 2)
DALYs (Disability-Adjusted Life Years)	Spain	Ischemic stroke	High body-mass index	Number	All ages	Both	29935.621 (4191.288, 60308.623)	22698.915 (3344.013, 48051.332)	-0.242 (-0.348, -0.133)
DALYs (Disability-Adjusted Life Years)	Sri Lanka	Ischemic stroke	High body-mass index	Number	All ages	Both	2985.28 (391.293, 5815.406)	10282.168 (1428.691, 21590.705)	2.444 (1.413, 3.892)
DALYs (Disability-Adjusted Life Years)	Sudan	Ischemic stroke	High body-mass index	Number	All ages	Both	11357.474 (1519.862, 23578.667)	34563.48 (5352.066, 70495.807)	2.043 (1.142, 3.317)
DALYs (Disability-Adjusted Life Years)	Suriname	Ischemic stroke	High body-mass index	Number	All ages	Both	91.943 (13.089, 182.819)	292.602 (44.227, 583.645)	2.182 (1.383, 3.274)
DALYs (Disability-Adjusted Life Years)	Sweden	Ischemic stroke	High body-mass index	Number	All ages	Both	5734.073 (806.612, 11705.672)	3976.005 (555.323, 8177.138)	-0.307 (-0.4, -0.189)
DALYs (Disability-Adjusted Life Years)	Switzerland	Ischemic stroke	High body-mass index	Number	All ages	Both	3168.977 (447.627, 6551.762)	2239.728 (307.388, 4682.34)	-0.293 (-0.399, -0.171)
DALYs (Disability-Adjusted Life Years)	Syrian Arab Republic	Ischemic stroke	High body-mass index	Number	All ages	Both	7013.423 (1097.699, 12948.639)	21789.524 (3661.282, 42019.661)	2.107 (1.241, 3.371)
DALYs (Disability-Adjusted Life Years)	Taiwan (Province of China)	Ischemic stroke	High body-mass index	Number	All ages	Both	4870.359 (663.25, 9347.816)	9360.31 (1295.033, 18302.722)	0.922 (0.537, 1.366)
DALYs (Disability-Adjusted Life Years)	Tajikistan	Ischemic stroke	High body-mass index	Number	All ages	Both	3311.617 (481.63, 6274.257)	6481.644 (972.772, 12753.502)	0.957 (0.471, 1.609)
DALYs (Disability-Adjusted Life Years)	Thailand	Ischemic stroke	High body-mass index	Number	All ages	Both	7080.173 (886.275, 13638.405)	33166.107 (5130.703, 63255.351)	3.684 (2.433, 5.421)
DALYs (Disability-Adjusted Life Years)	Timor-Leste	Ischemic stroke	High body-mass index	Number	All ages	Both	16.685 (1.954, 33.508)	121.998 (15.755, 245.703)	6.312 (3.355, 10.772)
DALYs (Disability-Adjusted Life Years)	Togo	Ischemic stroke	High body-mass index	Number	All ages	Both	538.159 (66.941, 1037.951)	2923.856 (408.762, 5649.373)	4.433 (3.017, 6.513)
DALYs (Disability-Adjusted Life Years)	Tokelau	Ischemic stroke	High body-mass index	Number	All ages	Both	1.178 (0.183, 2.377)	1.391 (0.228, 2.779)	0.182 (-0.079, 0.548)
DALYs (Disability-Adjusted Life Years)	Tonga	Ischemic stroke	High body-mass index	Number	All ages	Both	38.121 (6.148, 68.652)	65.423 (10.869, 118.433)	0.716 (0.364, 1.127)
DALYs (Disability-Adjusted Life Years)	Trinidad and Tobago	Ischemic stroke	High body-mass index	Number	All ages	Both	676.545 (103.858, 1252.92)	1176.431 (173.546, 2297.699)	0.739 (0.328, 1.204)
DALYs (Disability-Adjusted Life Years)	Tunisia	Ischemic stroke	High body-mass index	Number	All ages	Both	3232.534 (473.885, 6753.534)	12747.952 (2010.876, 25990.817)	2.944 (1.916, 4.561)
DALYs (Disability-Adjusted Life Years)	Turkey	Ischemic stroke	High body-mass index	Number	All ages	Both	36918.651 (5243.201, 70874.089)	76473.893 (12262.795, 148163.044)	1.071 (0.635, 1.731)
DALYs (Disability-Adjusted Life Years)	Turkmenistan	Ischemic stroke	High body-mass index	Number	All ages	Both	2705.78 (417.859, 5520.556)	7701.953 (1159.014, 15644.83)	1.846 (1.232, 2.58)
DALYs (Disability-Adjusted Life Years)	Tuvalu	Ischemic stroke	High body-mass index	Number	All ages	Both	7.154 (1.039, 13.894)	12.914 (2.053, 24.465)	0.805 (0.458, 1.259)
DALYs (Disability-Adjusted Life Years)	Uganda	Ischemic stroke	High body-mass index	Number	All ages	Both	927.585 (123.595, 1824.656)	3437.599 (471.831, 6806.768)	2.706 (1.78, 3.87)
DALYs (Disability-Adjusted Life Years)	Ukraine	Ischemic stroke	High body-mass index	Number	All ages	Both	137032.8 (19745.981, 261964.816)	116466.087 (18866.312, 227916.886)	-0.15 (-0.345, 0.092)
DALYs (Disability-Adjusted Life Years)	United Arab Emirates	Ischemic stroke	High body-mass index	Number	All ages	Both	758.189 (116.399, 1444.028)	6454.268 (1159.695, 11469.428)	7.513 (5.708, 10.475)
DALYs (Disability-Adjusted Life Years)	United Kingdom	Ischemic stroke	High body-mass index	Number	All ages	Both	55332.631 (7978.119, 111621.749)	29547.649 (4209.096, 60619.108)	-0.466 (-0.524, -0.412)
DALYs (Disability-Adjusted Life Years)	United Republic of Tanzania	Ischemic stroke	High body-mass index	Number	All ages	Both	2159.156 (252.923, 4185.955)	12105.334 (1655.878, 23965.942)	4.607 (3.022, 6.763)
DALYs (Disability-Adjusted Life Years)	United States of America	Ischemic stroke	High body-mass index	Number	All ages	Both	130336.567 (19056.868, 259326.14)	226759.089 (33748.579, 429106.246)	0.74 (0.523, 0.925)
DALYs (Disability-Adjusted Life Years)	United States Virgin Islands	Ischemic stroke	High body-mass index	Number	All ages	Both	46.05 (7.577, 88.594)	56.496 (8.979, 113.226)	0.227 (-0.065, 0.582)
DALYs (Disability-Adjusted Life Years)	Uruguay	Ischemic stroke	High body-mass index	Number	All ages	Both	3112.704 (447.535, 6149.677)	2699.267 (399.395, 5537.083)	-0.133 (-0.244, -0.009)
DALYs (Disability-Adjusted Life Years)	Uzbekistan	Ischemic stroke	High body-mass index	Number	All ages	Both	13788.807 (2067.428, 26538.432)	34217.388 (5089.873, 68177.399)	1.482 (1.092, 1.957)
DALYs (Disability-Adjusted Life Years)	Vanuatu	Ischemic stroke	High body-mass index	Number	All ages	Both	39.859 (5.304, 81.82)	147.431 (21.351, 295.22)	2.699 (1.843, 3.874)
DALYs (Disability-Adjusted Life Years)	Venezuela (Bolivarian Republic of)	Ischemic stroke	High body-mass index	Number	All ages	Both	3872.922 (605.807, 7822.676)	12422.909 (1924.07, 24541.287)	2.208 (1.406, 3.273)
DALYs (Disability-Adjusted Life Years)	Viet Nam	Ischemic stroke	High body-mass index	Number	All ages	Both	2928.598 (369.569, 5856.578)	22352.667 (2780.999, 44611.561)	6.633 (4.11, 10.403)
DALYs (Disability-Adjusted Life Years)	Yemen	Ischemic stroke	High body-mass index	Number	All ages	Both	3581.408 (463.052, 7207.449)	20090.512 (2668.681, 39579.086)	4.61 (2.983, 7.196)
DALYs (Disability-Adjusted Life Years)	Zambia	Ischemic stroke	High body-mass index	Number	All ages	Both	535.663 (67.195, 1064.118)	3681.136 (530.563, 7322.578)	5.872 (3.807, 8.975)
DALYs (Disability-Adjusted Life Years)	Zimbabwe	Ischemic stroke	High body-mass index	Number	All ages	Both	970.202 (140.832, 1847.039)	5677.202 (831.258, 11066.877)	4.852 (3.42, 7.288)
