# Supplementary material for: Global Ischemic Stroke Burden Due to High BMI, 1990–2021: An Age-Period-Cohort Study and Future Risk Prediction Using GBD Data
Source: Research Square preprint supplement (doi:10.21203/rs.3.rs-7557435/v1), 2025-09-23
Supplement: Supplementary file 5 [file 965f41556878723b7d663c8b.xlsx]

## Sheet: Sheet1
TABLE 2 The disease burden of ischemic stroke related to high body mass index in 1990 and 2021, including DALY cases, ASDR, PC, and EAPC
location_name	1990		2021		PC (1990–2021)	EAPC _CI (1990–2021)
	the number of DALYs	ASDR (per 100,000)	the number of DALYs	ASDR (per 100,000)	the number of DALYs	ASDR
Global	2125882.838 (305139.043, 4176470.906)	55.302 (7.903, 109.16)	4439186.306 (649030.208, 8647485.108)	51.516 (7.522, 100.277)	1.088 (0.938, 1.239)	-0.583 (-0.705, -0.46)
High SDI	538605.453 (77720.149, 1061207.563)	48.787 (7.056, 95.712)	661435.663 (96984.165, 1288502.418)	33.795 (5.041, 64.294)	0.228 (0.137, 0.327)	-1.487 (-1.65, -1.324)
High-middle SDI	991972.135 (143949.382, 1936031.42)	102.625 (14.808, 200.557)	1536337.635 (224291.7, 3026099.85)	78.105 (11.41, 153.303)	0.549 (0.404, 0.687)	-1.462 (-1.713, -1.211)
Middle SDI	353110.251 (49017.276, 691960.804)	33.365 (4.602, 65.443)	1345497.057 (196395.399, 2623779.34)	49.741 (7.224, 96.012)	2.81 (2.401, 3.261)	1.214 (1.171, 1.257)
Low-middle SDI	190029.173 (28031.82, 375612.259)	30.591 (4.472, 60.488)	714612.22 (107664.513, 1360756.665)	48.287 (7.191, 93.141)	2.761 (2.24, 3.4)	1.592 (1.537, 1.648)
Low SDI	47394.668 (5810.419, 89586.91)	20.07 (2.449, 37.579)	175785.547 (23293.541, 325992.908)	32.668 (4.293, 60.925)	2.709 (2.277, 3.287)	1.474 (1.418, 1.53)
Andean Latin America	6416.179 (953.403, 12669.674)	29.537 (4.344, 59.245)	15857.09 (2424.642, 30573.814)	26.406 (4.01, 51.133)	1.471 (1.017, 2.04)	-0.59 (-0.78, -0.401)
Australasia	9130.66 (1293.112, 17837.076)	39.104 (5.54, 76.57)	11931.08 (1755.653, 24170.185)	22.185 (3.282, 44.176)	0.307 (0.108, 0.499)	-2.048 (-2.187, -1.909)
Caribbean	9692.972 (1443.945, 18489.24)	36.949 (5.502, 70.717)	24288.208 (3602.879, 47134.602)	45.208 (6.704, 87.629)	1.506 (1.18, 1.857)	0.737 (0.664, 0.809)
Central Asia	59310.386 (8900.173, 115314.88)	126.022 (18.819, 247.563)	103341.849 (15631.939, 204337.957)	125.812 (18.866, 250.745)	0.742 (0.542, 0.979)	-0.552 (-0.88, -0.223)
Central Europe	243849.144 (36391.633, 484804.558)	165.966 (24.644, 328.979)	223880.058 (33111.81, 452257.024)	99.707 (14.84, 199.43)	-0.082 (-0.164, 0.003)	-2.001 (-2.144, -1.857)
Central Latin America	34507.256 (5208.502, 66361.145)	40.091 (5.974, 78.25)	81392.555 (13026.5, 157422.041)	32.447 (5.164, 63.08)	1.359 (1.087, 1.659)	-0.958 (-1.162, -0.752)
Central Sub-Saharan Africa	4954.394 (601.19, 9897.713)	21.908 (2.61, 43.426)	24336.833 (3307.221, 47976.814)	45.787 (6.197, 91.706)	3.912 (2.886, 5.159)	2.244 (2.17, 2.318)
East Asia	219207.74 (27613.948, 445420.903)	24.591 (3.091, 49.991)	1211193.323 (169036.108, 2443992.39)	55.34 (7.714, 111.282)	4.525 (3.429, 6.14)	2.744 (2.62, 2.869)
Eastern Europe	569713.273 (83771.555, 1089044.321)	206.062 (30.143, 395.781)	577167.077 (85340.907, 1106626.455)	164.882 (24.405, 314.311)	0.013 (-0.12, 0.129)	-1.504 (-1.981, -1.025)
Eastern Sub-Saharan Africa	11719.066 (1381.205, 21899.823)	15.032 (1.755, 27.892)	50799.806 (6683.745, 96597.313)	28.935 (3.77, 55.644)	3.335 (2.529, 4.268)	2.04 (2.007, 2.073)
High-income Asia Pacific	38503.619 (5202.932, 75192.97)	19.552 (2.641, 38.181)	49208.566 (6573.131, 95107.495)	11.468 (1.55, 22.047)	0.278 (0.058, 0.504)	-2.136 (-2.298, -1.973)
High-income North America	142286.5 (20793.684, 283173.597)	40.668 (5.973, 80.267)	243698.247 (36203.986, 461887.336)	39.466 (5.956, 73.949)	0.713 (0.509, 0.891)	-0.552 (-0.763, -0.34)
North Africa and Middle East	228386.338 (35661.39, 445978.829)	130.721 (20.152, 257.777)	721489.732 (120831.883, 1361534.835)	153.11 (25.18, 294.927)	2.159 (1.676, 2.776)	0.474 (0.444, 0.505)
Oceania	1408.746 (200.377, 2737.667)	43.429 (6.067, 86.316)	3902.944 (581.724, 7797.379)	47.781 (6.951, 98.514)	1.771 (1.376, 2.257)	0.177 (0.111, 0.243)
South Asia	51877.813 (5825.714, 103010.577)	8.657 (0.97, 16.964)	296457.433 (36907.653, 575986.362)	19.463 (2.408, 37.521)	4.715 (3.798, 6.001)	2.684 (2.627, 2.74)
Southeast Asia	48812.326 (6394.061, 92971.967)	17.425 (2.284, 33.272)	253681.969 (35125.703, 491102.279)	36.82 (5.029, 70.622)	4.197 (3.396, 5.037)	2.545 (2.4, 2.69)
Southern Latin America	29391.87 (4266.047, 57847.237)	64.202 (9.319, 127.158)	33033.784 (4861.011, 66211.33)	37.768 (5.579, 75.171)	0.124 (-0.004, 0.263)	-1.562 (-1.662, -1.462)
Southern Sub-Saharan Africa	16232.951 (2442.64, 30977.434)	58.178 (8.691, 110.087)	55864 (8355.36, 108238.845)	100.524 (14.902, 195.522)	2.441 (2.052, 2.933)	1.932 (1.508, 2.358)
Tropical Latin America	69050.277 (10218.78, 133286.024)	74.489 (10.903, 147.448)	114420.878 (16780.396, 225013.788)	44.548 (6.517, 88.323)	0.657 (0.489, 0.849)	-1.784 (-1.952, -1.617)
Western Europe	296552.615 (42029.667, 587387.618)	50.593 (7.199, 99.378)	209161.177 (29681.681, 432094.025)	21.827 (3.128, 43.88)	-0.295 (-0.365, -0.231)	-2.914 (-3.072, -2.755)
Western Sub-Saharan Africa	34878.713 (4435.118, 66860.77)	39.127 (4.996, 76.483)	134079.699 (18738.388, 253495.547)	66.501 (9.172, 126.683)	2.844 (2.09, 3.918)	1.659 (1.548, 1.771)
DALYs, disability-adjusted life years; ASDR, age-standardized DALY rate; PC, percentage change; EAPC, estimated annual percentage change; CI, confidence interval.
