# Supplementary material for: Global Ischemic Stroke Burden Due to High BMI, 1990–2021: An Age-Period-Cohort Study and Future Risk Prediction Using GBD Data
Source: Research Square preprint supplement (doi:10.21203/rs.3.rs-7557435/v1), 2025-09-23
Supplement: Supplementary file 5 [file b1eb23dbb767142a8d3fa577.pdf]

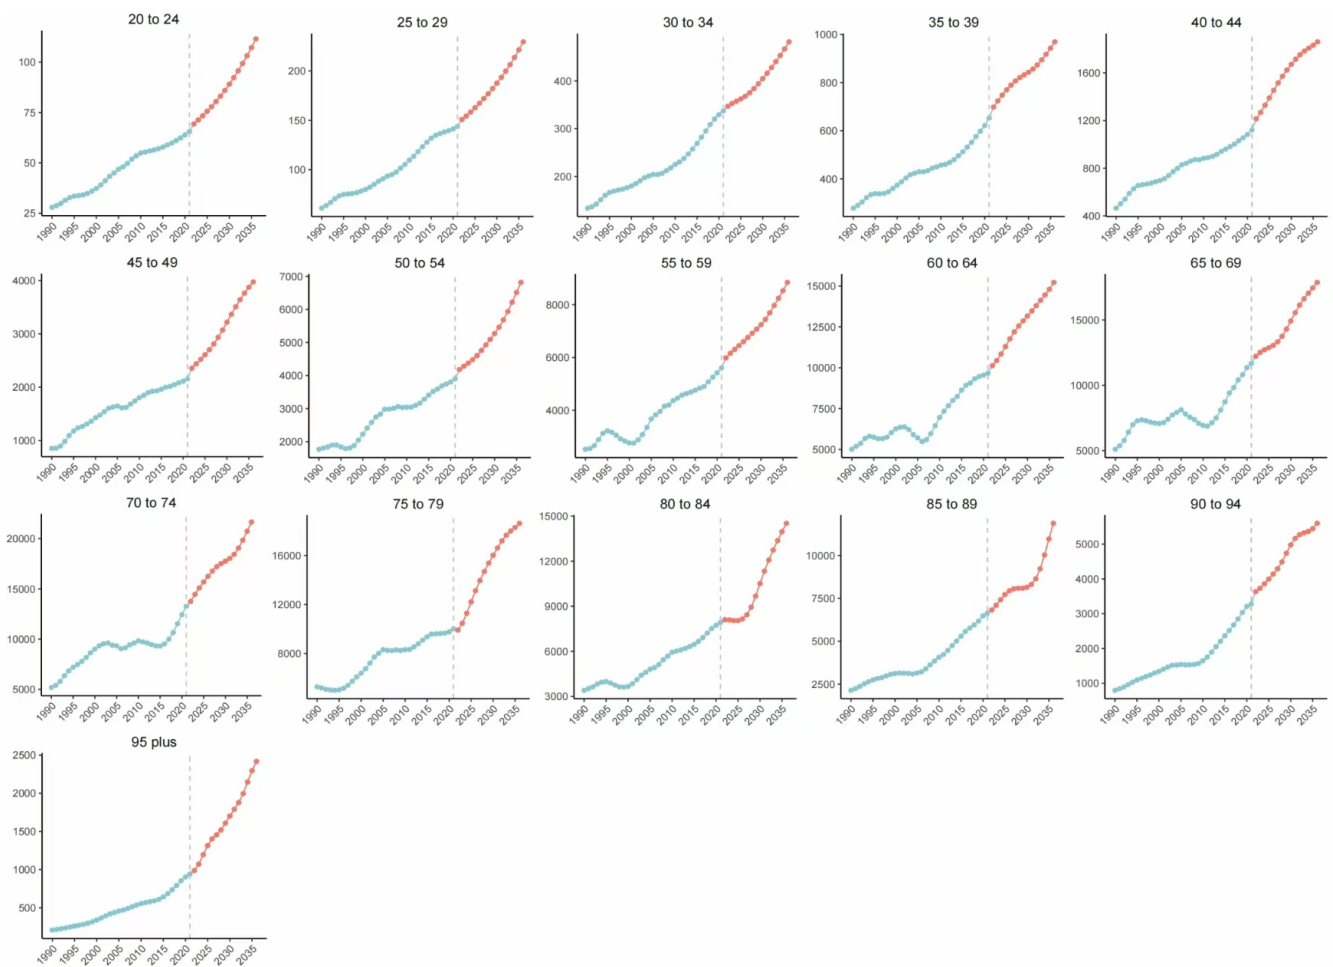

Supplementary Figure 5  
Global predictions of death cases for different age groups of males between 2022 and 2036.
