# Supplementary material for: Global Ischemic Stroke Burden Due to High BMI, 1990–2021: An Age-Period-Cohort Study and Future Risk Prediction Using GBD Data
Source: Research Square preprint supplement (doi:10.21203/rs.3.rs-7557435/v1), 2025-09-23
Supplement: Supplementary file 6 [file f30de8410e6c67beeeee2214.xlsx]

## Sheet: Sheet1
							1990	2021
measure_name	location_name	cause_name	rei_name	metric_name	age_name	sex_name	val_95UI	val_95UI	PC
Deaths	Afghanistan	Ischemic stroke	High body-mass index	Number	All ages	Both	269.108 (34.164, 541.342)	509.264 (79.579, 1112.519)	0.892 (0.372, 1.762)
Deaths	Albania	Ischemic stroke	High body-mass index	Number	All ages	Both	49.088 (7.194, 104.183)	117.905 (16.029, 257.231)	1.402 (0.655, 2.394)
Deaths	Algeria	Ischemic stroke	High body-mass index	Number	All ages	Both	347.556 (48.954, 728.305)	1471.407 (240.686, 3032.73)	3.234 (2.113, 4.886)
Deaths	American Samoa	Ischemic stroke	High body-mass index	Number	All ages	Both	0.578 (0.094, 1.075)	1.303 (0.211, 2.471)	1.255 (0.751, 1.893)
Deaths	Andorra	Ischemic stroke	High body-mass index	Number	All ages	Both	0.53 (0.079, 1.183)	1.141 (0.162, 2.554)	1.154 (0.355, 2.239)
Deaths	Angola	Ischemic stroke	High body-mass index	Number	All ages	Both	21.851 (2.671, 43.498)	143.376 (19.949, 293.13)	5.561 (3.284, 8.57)
Deaths	Antigua and Barbuda	Ischemic stroke	High body-mass index	Number	All ages	Both	1.139 (0.167, 2.336)	1.983 (0.297, 4.03)	0.741 (0.397, 1.132)
Deaths	Argentina	Ischemic stroke	High body-mass index	Number	All ages	Both	825.753 (118.839, 1672.084)	811.986 (119.373, 1724.672)	-0.017 (-0.167, 0.17)
Deaths	Armenia	Ischemic stroke	High body-mass index	Number	All ages	Both	109.793 (16.735, 220.451)	156.003 (24.363, 323.299)	0.421 (0.192, 0.701)
Deaths	Australia	Ischemic stroke	High body-mass index	Number	All ages	Both	346.442 (48.889, 721.509)	448.454 (63.451, 1026.888)	0.294 (0.003, 0.6)
Deaths	Austria	Ischemic stroke	High body-mass index	Number	All ages	Both	352.766 (48.497, 744.776)	149.992 (20.181, 330.576)	-0.575 (-0.654, -0.489)
Deaths	Azerbaijan	Ischemic stroke	High body-mass index	Number	All ages	Both	119.619 (16.829, 243.852)	238.271 (34.311, 510.176)	0.992 (0.367, 1.991)
Deaths	Bahamas	Ischemic stroke	High body-mass index	Number	All ages	Both	2.774 (0.41, 5.456)	7.306 (1.049, 14.214)	1.634 (1.016, 2.363)
Deaths	Bahrain	Ischemic stroke	High body-mass index	Number	All ages	Both	5.892 (0.863, 11.546)	25.992 (4.342, 51.817)	3.411 (2.437, 4.806)
Deaths	Bangladesh	Ischemic stroke	High body-mass index	Number	All ages	Both	147.045 (16.719, 310.915)	1061.382 (138.647, 2284.658)	6.218 (3.784, 9.573)
Deaths	Barbados	Ischemic stroke	High body-mass index	Number	All ages	Both	8.925 (1.265, 18.377)	15.416 (2.317, 32.491)	0.727 (0.287, 1.27)
Deaths	Belarus	Ischemic stroke	High body-mass index	Number	All ages	Both	799.073 (115.473, 1585.25)	1002.125 (149.692, 2030.425)	0.254 (0.026, 0.539)
Deaths	Belgium	Ischemic stroke	High body-mass index	Number	All ages	Both	306.341 (42.602, 621.614)	223.201 (30.488, 488.773)	-0.271 (-0.418, -0.081)
Deaths	Belize	Ischemic stroke	High body-mass index	Number	All ages	Both	1.416 (0.203, 2.91)	5.2 (0.826, 10.301)	2.674 (2.013, 3.499)
Deaths	Benin	Ischemic stroke	High body-mass index	Number	All ages	Both	32.546 (4.25, 67.545)	117.139 (16.353, 242.987)	2.599 (1.584, 4.207)
Deaths	Bermuda	Ischemic stroke	High body-mass index	Number	All ages	Both	1.49 (0.216, 3.107)	2.376 (0.364, 4.967)	0.594 (0.255, 1.047)
Deaths	Bhutan	Ischemic stroke	High body-mass index	Number	All ages	Both	2.212 (0.318, 4.646)	7.305 (1.116, 15.778)	2.303 (1.218, 3.973)
Deaths	Bolivia (Plurinational State of)	Ischemic stroke	High body-mass index	Number	All ages	Both	44.243 (5.915, 92.191)	125.511 (17.068, 277.283)	1.837 (1.011, 3.147)
Deaths	Bosnia and Herzegovina	Ischemic stroke	High body-mass index	Number	All ages	Both	218.151 (31.121, 451.389)	378.377 (56.059, 794.04)	0.734 (0.277, 1.344)
Deaths	Botswana	Ischemic stroke	High body-mass index	Number	All ages	Both	9.747 (1.265, 19.719)	36.854 (4.881, 75.25)	2.781 (1.566, 4.935)
Deaths	Brazil	Ischemic stroke	High body-mass index	Number	All ages	Both	2594.48 (378.531, 5155.909)	4765.238 (689.971, 9733.248)	0.837 (0.594, 1.108)
Deaths	Brunei Darussalam	Ischemic stroke	High body-mass index	Number	All ages	Both	0.949 (0.126, 1.824)	2.773 (0.376, 5.393)	1.92 (1.118, 2.983)
Deaths	Bulgaria	Ischemic stroke	High body-mass index	Number	All ages	Both	1054.546 (153.826, 2088.464)	1557.172 (231.471, 3236.929)	0.477 (0.224, 0.751)
Deaths	Burkina Faso	Ischemic stroke	High body-mass index	Number	All ages	Both	14.798 (2.034, 31.122)	52.263 (6.496, 107.073)	2.532 (1.356, 4.342)
Deaths	Burundi	Ischemic stroke	High body-mass index	Number	All ages	Both	14.57 (1.631, 31.684)	25.395 (3.219, 51.778)	0.743 (0.132, 1.665)
Deaths	Cabo Verde	Ischemic stroke	High body-mass index	Number	All ages	Both	2.31 (0.291, 4.756)	11.562 (1.808, 23.394)	4.005 (2.472, 6.436)
Deaths	Cambodia	Ischemic stroke	High body-mass index	Number	All ages	Both	19.023 (2.422, 36.949)	82.232 (11.587, 162.318)	3.323 (1.878, 5.348)
Deaths	Cameroon	Ischemic stroke	High body-mass index	Number	All ages	Both	82.908 (10.389, 169.418)	472.689 (67.891, 987.832)	4.701 (2.962, 7.883)
Deaths	Canada	Ischemic stroke	High body-mass index	Number	All ages	Both	504.568 (72.778, 1060.254)	604.878 (84.176, 1340.152)	0.199 (-0.019, 0.455)
Deaths	Central African Republic	Ischemic stroke	High body-mass index	Number	All ages	Both	7.355 (0.8, 15.26)	26.589 (3.189, 60.014)	2.615 (1.452, 4.181)
Deaths	Chad	Ischemic stroke	High body-mass index	Number	All ages	Both	26.87 (3.284, 59.422)	88.455 (11.149, 191.37)	2.292 (1.237, 3.891)
Deaths	Chile	Ischemic stroke	High body-mass index	Number	All ages	Both	283.846 (41.032, 578.447)	424.238 (61.082, 869.207)	0.495 (0.282, 0.724)
Deaths	China	Ischemic stroke	High body-mass index	Number	All ages	Both	7171.314 (908.754, 14527.068)	44262.785 (6069.005, 91658.22)	5.172 (3.653, 7.411)
Deaths	Colombia	Ischemic stroke	High body-mass index	Number	All ages	Both	237.348 (33.867, 458.259)	524.348 (77.52, 1105.757)	1.209 (0.759, 1.761)
Deaths	Comoros	Ischemic stroke	High body-mass index	Number	All ages	Both	1.593 (0.196, 3.284)	6.844 (0.956, 13.702)	3.296 (1.92, 5.442)
Deaths	Congo	Ischemic stroke	High body-mass index	Number	All ages	Both	12.252 (1.343, 25.75)	57.743 (7.564, 116.33)	3.713 (2.298, 5.724)
Deaths	Cook Islands	Ischemic stroke	High body-mass index	Number	All ages	Both	0.308 (0.045, 0.616)	0.499 (0.079, 1.015)	0.618 (0.185, 1.217)
Deaths	Costa Rica	Ischemic stroke	High body-mass index	Number	All ages	Both	18.312 (2.551, 37.719)	54.583 (8.199, 115.091)	1.981 (1.465, 2.636)
Deaths	Cote d'Ivoire	Ischemic stroke	High body-mass index	Number	All ages	Both	62.7 (7.744, 123.333)	302.329 (39.357, 615.79)	3.822 (2.37, 5.976)
Deaths	Croatia	Ischemic stroke	High body-mass index	Number	All ages	Both	382.277 (53.989, 786.249)	333.179 (47.968, 726.772)	-0.128 (-0.286, 0.066)
Deaths	Cuba	Ischemic stroke	High body-mass index	Number	All ages	Both	128.343 (19.269, 244.484)	390.856 (56.103, 782.698)	2.045 (1.325, 2.807)
Deaths	Cyprus	Ischemic stroke	High body-mass index	Number	All ages	Both	14.868 (2.093, 30.156)	23.228 (3.586, 51.634)	0.562 (0.063, 1.238)
Deaths	Czechia	Ischemic stroke	High body-mass index	Number	All ages	Both	1443.509 (211.927, 2986.536)	522.439 (77.926, 1116.723)	-0.638 (-0.698, -0.573)
Deaths	Democratic People's Republic of Korea	Ischemic stroke	High body-mass index	Number	All ages	Both	97.275 (11.916, 217.9)	592.478 (78.042, 1384.422)	5.091 (3.225, 7.964)
Deaths	Democratic Republic of the Congo	Ischemic stroke	High body-mass index	Number	All ages	Both	103.654 (11.467, 218.113)	520.77 (64.792, 1144.333)	4.024 (2.399, 6.167)
Deaths	Denmark	Ischemic stroke	High body-mass index	Number	All ages	Both	153.225 (21.988, 312.71)	114.115 (15.598, 242.434)	-0.255 (-0.393, -0.103)
Deaths	Djibouti	Ischemic stroke	High body-mass index	Number	All ages	Both	0.38 (0.042, 0.855)	3.406 (0.424, 7.023)	7.969 (4.655, 12.886)
Deaths	Dominica	Ischemic stroke	High body-mass index	Number	All ages	Both	2.193 (0.313, 4.368)	3.43 (0.527, 6.971)	0.564 (0.235, 0.951)
Deaths	Dominican Republic	Ischemic stroke	High body-mass index	Number	All ages	Both	34.064 (4.55, 69.14)	175.45 (27.189, 360.202)	4.151 (2.644, 6.28)
Deaths	Ecuador	Ischemic stroke	High body-mass index	Number	All ages	Both	74.366 (10.83, 149.285)	194.724 (27.283, 394.639)	1.618 (0.919, 2.454)
Deaths	Egypt	Ischemic stroke	High body-mass index	Number	All ages	Both	2471.171 (375.227, 5216.058)	7874.866 (1359.182, 15228.419)	2.187 (1.358, 3.396)
Deaths	El Salvador	Ischemic stroke	High body-mass index	Number	All ages	Both	37.776 (5.273, 78.145)	78.976 (11.008, 164.352)	1.091 (0.583, 1.722)
Deaths	Equatorial Guinea	Ischemic stroke	High body-mass index	Number	All ages	Both	2.383 (0.308, 5.112)	11.506 (1.557, 23.654)	3.829 (1.885, 7.019)
Deaths	Eritrea	Ischemic stroke	High body-mass index	Number	All ages	Both	3.429 (0.363, 7.497)	14.377 (1.904, 31.583)	3.193 (1.815, 5.582)
Deaths	Estonia	Ischemic stroke	High body-mass index	Number	All ages	Both	178.433 (26.402, 361.518)	60.159 (8.45, 124.925)	-0.663 (-0.724, -0.597)
Deaths	Eswatini	Ischemic stroke	High body-mass index	Number	All ages	Both	8.788 (1.094, 17.174)	29.97 (3.84, 62.541)	2.41 (1.286, 4.103)
Deaths	Ethiopia	Ischemic stroke	High body-mass index	Number	All ages	Both	54.921 (5.594, 119.055)	147.589 (18.797, 300.765)	1.687 (0.544, 3.216)
Deaths	Fiji	Ischemic stroke	High body-mass index	Number	All ages	Both	7.487 (1.058, 15.292)	21.459 (3.456, 42.632)	1.866 (1.084, 3.184)
Deaths	Finland	Ischemic stroke	High body-mass index	Number	All ages	Both	196.865 (28.525, 405.015)	167.764 (23.163, 350.517)	-0.148 (-0.311, 0.044)
Deaths	France	Ischemic stroke	High body-mass index	Number	All ages	Both	1204.321 (168.914, 2399.937)	1271.818 (170.295, 2734.392)	0.056 (-0.175, 0.303)
Deaths	Gabon	Ischemic stroke	High body-mass index	Number	All ages	Both	10.2 (1.359, 20.371)	28.673 (3.944, 56.037)	1.811 (0.973, 2.964)
Deaths	Gambia	Ischemic stroke	High body-mass index	Number	All ages	Both	5.798 (0.73, 11.773)	29.593 (3.757, 60.276)	4.104 (2.521, 6.512)
Deaths	Georgia	Ischemic stroke	High body-mass index	Number	All ages	Both	230.403 (32.896, 480.132)	363.607 (51.051, 737.363)	0.578 (0.242, 1.094)
Deaths	Germany	Ischemic stroke	High body-mass index	Number	All ages	Both	4423.041 (610.951, 8999.98)	2362.622 (332.527, 5122.359)	-0.466 (-0.555, -0.38)
Deaths	Ghana	Ischemic stroke	High body-mass index	Number	All ages	Both	90.808 (11.541, 178.462)	614.378 (81.476, 1215.99)	5.766 (3.533, 9.12)
Deaths	Greece	Ischemic stroke	High body-mass index	Number	All ages	Both	521.999 (72.967, 1107.309)	532.759 (75.344, 1204.255)	0.021 (-0.256, 0.309)
Deaths	Greenland	Ischemic stroke	High body-mass index	Number	All ages	Both	1.205 (0.167, 2.489)	1.042 (0.166, 2.199)	-0.136 (-0.351, 0.16)
Deaths	Grenada	Ischemic stroke	High body-mass index	Number	All ages	Both	2.309 (0.321, 4.684)	2.589 (0.351, 5.2)	0.121 (-0.113, 0.392)
Deaths	Guam	Ischemic stroke	High body-mass index	Number	All ages	Both	1.287 (0.177, 2.56)	2.261 (0.352, 4.619)	0.757 (0.428, 1.216)
Deaths	Guatemala	Ischemic stroke	High body-mass index	Number	All ages	Both	35.807 (5.511, 68.744)	106.951 (15.765, 219.447)	1.987 (1.377, 2.732)
Deaths	Guinea	Ischemic stroke	High body-mass index	Number	All ages	Both	35.856 (4.442, 72.29)	109.753 (14.554, 222.352)	2.061 (1.061, 3.628)
Deaths	Guinea-Bissau	Ischemic stroke	High body-mass index	Number	All ages	Both	6.434 (0.85, 13.741)	20.259 (2.859, 40.838)	2.149 (1.175, 3.588)
Deaths	Guyana	Ischemic stroke	High body-mass index	Number	All ages	Both	15.46 (2.131, 30.546)	22.021 (3.322, 43.581)	0.424 (0.073, 0.858)
Deaths	Haiti	Ischemic stroke	High body-mass index	Number	All ages	Both	34.337 (4.263, 69.755)	117.225 (14.78, 249.33)	2.414 (1.256, 4.065)
Deaths	Honduras	Ischemic stroke	High body-mass index	Number	All ages	Both	30.649 (4.13, 63.439)	173.192 (24.481, 362.925)	4.651 (3.284, 6.49)
Deaths	Hungary	Ischemic stroke	High body-mass index	Number	All ages	Both	1291.808 (194.147, 2623.75)	743.095 (109.803, 1474.711)	-0.425 (-0.529, -0.325)
Deaths	Iceland	Ischemic stroke	High body-mass index	Number	All ages	Both	5.749 (0.841, 12.031)	5.053 (0.692, 11.107)	-0.121 (-0.313, 0.068)
Deaths	India	Ischemic stroke	High body-mass index	Number	All ages	Both	1185.926 (129.577, 2422.708)	7344.769 (893.446, 14301.799)	5.193 (3.862, 7.027)
Deaths	Indonesia	Ischemic stroke	High body-mass index	Number	All ages	Both	437.854 (54.349, 868.881)	3380.033 (438.842, 6851.484)	6.72 (4.478, 9.572)
Deaths	Iran (Islamic Republic of)	Ischemic stroke	High body-mass index	Number	All ages	Both	847.686 (125.966, 1611.798)	2900.076 (442.846, 5627.226)	2.421 (1.685, 3.305)
Deaths	Iraq	Ischemic stroke	High body-mass index	Number	All ages	Both	731.333 (104.983, 1480.856)	2137.425 (343.758, 4308.844)	1.923 (1.157, 2.982)
Deaths	Ireland	Ischemic stroke	High body-mass index	Number	All ages	Both	94.395 (13.715, 195.188)	63.266 (8.92, 140.443)	-0.33 (-0.478, -0.145)
Deaths	Israel	Ischemic stroke	High body-mass index	Number	All ages	Both	74.477 (10.774, 153.182)	80.925 (11.243, 173.233)	0.087 (-0.136, 0.324)
Deaths	Italy	Ischemic stroke	High body-mass index	Number	All ages	Both	1997.846 (279.666, 4074.627)	1868.682 (248.173, 4128.393)	-0.065 (-0.279, 0.144)
Deaths	Jamaica	Ischemic stroke	High body-mass index	Number	All ages	Both	45.39 (6.419, 88.647)	94.415 (14.652, 191.811)	1.08 (0.524, 1.772)
Deaths	Japan	Ischemic stroke	High body-mass index	Number	All ages	Both	1193.927 (158.112, 2355.284)	1550.171 (200.077, 3254.129)	0.298 (-0.018, 0.673)
Deaths	Jordan	Ischemic stroke	High body-mass index	Number	All ages	Both	95.31 (14.353, 187.742)	347.445 (57.243, 685.226)	2.645 (1.778, 4.107)
Deaths	Kazakhstan	Ischemic stroke	High body-mass index	Number	All ages	Both	811.033 (119.756, 1625.322)	1055.508 (157.011, 2176.881)	0.301 (0.064, 0.635)
Deaths	Kenya	Ischemic stroke	High body-mass index	Number	All ages	Both	32.255 (3.839, 65.348)	208.796 (26.897, 415.214)	5.473 (3.887, 7.764)
Deaths	Kiribati	Ischemic stroke	High body-mass index	Number	All ages	Both	0.804 (0.118, 1.626)	2.424 (0.384, 4.787)	2.014 (1.185, 3.394)
Deaths	Kuwait	Ischemic stroke	High body-mass index	Number	All ages	Both	13.825 (2.13, 25.628)	74.604 (12.154, 144.052)	4.396 (3.23, 5.847)
Deaths	Kyrgyzstan	Ischemic stroke	High body-mass index	Number	All ages	Both	179.982 (26.724, 350.58)	234.17 (37.588, 459.031)	0.301 (0.071, 0.642)
Deaths	Lao People's Democratic Republic	Ischemic stroke	High body-mass index	Number	All ages	Both	17.697 (2.311, 36.211)	56.673 (7.18, 116.745)	2.202 (1.019, 3.934)
Deaths	Latvia	Ischemic stroke	High body-mass index	Number	All ages	Both	345.577 (52.034, 714.602)	312.204 (44.883, 647.553)	-0.097 (-0.242, 0.06)
Deaths	Lebanon	Ischemic stroke	High body-mass index	Number	All ages	Both	84.259 (11.104, 176.821)	156.682 (22.921, 330.157)	0.86 (0.245, 1.6)
Deaths	Lesotho	Ischemic stroke	High body-mass index	Number	All ages	Both	16.048 (2.396, 34.203)	50.1 (7.613, 103.34)	2.122 (1.061, 3.816)
Deaths	Liberia	Ischemic stroke	High body-mass index	Number	All ages	Both	24.988 (3.232, 49.736)	73.022 (10.666, 147.751)	1.922 (1.044, 3.198)
Deaths	Libya	Ischemic stroke	High body-mass index	Number	All ages	Both	50.34 (7.31, 104.119)	303.756 (49.346, 599.03)	5.034 (3.415, 7.519)
Deaths	Lithuania	Ischemic stroke	High body-mass index	Number	All ages	Both	218.554 (33.101, 439.928)	278.01 (39.09, 613.275)	0.272 (0.056, 0.509)
Deaths	Luxembourg	Ischemic stroke	High body-mass index	Number	All ages	Both	20.453 (2.773, 40.986)	10.54 (1.469, 23.041)	-0.485 (-0.582, -0.37)
Deaths	Madagascar	Ischemic stroke	High body-mass index	Number	All ages	Both	33.815 (4.381, 66.081)	133.602 (18.098, 271.318)	2.951 (1.594, 4.793)
Deaths	Malawi	Ischemic stroke	High body-mass index	Number	All ages	Both	18.774 (2.157, 36.383)	94.98 (12.133, 191.308)	4.059 (2.509, 6.293)
Deaths	Malaysia	Ischemic stroke	High body-mass index	Number	All ages	Both	109.149 (15.958, 208.385)	458.001 (63.366, 914.584)	3.196 (2.259, 4.465)
Deaths	Maldives	Ischemic stroke	High body-mass index	Number	All ages	Both	0.946 (0.119, 1.862)	2.564 (0.361, 5.012)	1.709 (0.857, 2.821)
Deaths	Mali	Ischemic stroke	High body-mass index	Number	All ages	Both	31.487 (3.73, 68.717)	87.65 (11.026, 183.265)	1.784 (0.962, 3.05)
Deaths	Malta	Ischemic stroke	High body-mass index	Number	All ages	Both	8.072 (1.127, 15.532)	8.435 (1.211, 18.502)	0.045 (-0.204, 0.372)
Deaths	Marshall Islands	Ischemic stroke	High body-mass index	Number	All ages	Both	0.488 (0.072, 1.049)	1.168 (0.176, 2.43)	1.392 (0.752, 2.236)
Deaths	Mauritania	Ischemic stroke	High body-mass index	Number	All ages	Both	33.207 (4.501, 71.358)	86.816 (11.773, 186.921)	1.614 (0.916, 2.644)
Deaths	Mauritius	Ischemic stroke	High body-mass index	Number	All ages	Both	20.232 (2.809, 38.673)	29.638 (4.264, 58.991)	0.465 (0.199, 0.815)
Deaths	Mexico	Ischemic stroke	High body-mass index	Number	All ages	Both	685.018 (101.014, 1358.885)	1554.677 (247.561, 3088.252)	1.27 (0.949, 1.634)
Deaths	Micronesia (Federated States of)	Ischemic stroke	High body-mass index	Number	All ages	Both	1.667 (0.243, 3.404)	2.818 (0.419, 5.756)	0.691 (0.232, 1.367)
Deaths	Monaco	Ischemic stroke	High body-mass index	Number	All ages	Both	3.087 (0.404, 6.494)	2.3 (0.33, 4.868)	-0.255 (-0.445, 0.08)
Deaths	Mongolia	Ischemic stroke	High body-mass index	Number	All ages	Both	10.353 (1.617, 20.773)	25.206 (3.208, 51.13)	1.435 (0.633, 2.565)
Deaths	Montenegro	Ischemic stroke	High body-mass index	Number	All ages	Both	13.828 (2.03, 28.941)	41.597 (5.643, 88.697)	2.008 (1.137, 3.186)
Deaths	Morocco	Ischemic stroke	High body-mass index	Number	All ages	Both	535.067 (71.208, 1166.255)	1964.323 (286.363, 4056.313)	2.671 (1.694, 3.977)
Deaths	Mozambique	Ischemic stroke	High body-mass index	Number	All ages	Both	40.358 (5.068, 82.12)	209.554 (27.572, 434.706)	4.192 (2.438, 6.374)
Deaths	Myanmar	Ischemic stroke	High body-mass index	Number	All ages	Both	198.036 (25.766, 394.251)	486.276 (67.401, 984.776)	1.455 (0.642, 2.607)
Deaths	Namibia	Ischemic stroke	High body-mass index	Number	All ages	Both	12.067 (1.601, 25.553)	49.764 (7.003, 96.801)	3.124 (1.778, 4.888)
Deaths	Nauru	Ischemic stroke	High body-mass index	Number	All ages	Both	0.262 (0.043, 0.488)	0.406 (0.063, 0.784)	0.548 (0.142, 1.228)
Deaths	Nepal	Ischemic stroke	High body-mass index	Number	All ages	Both	30.388 (3.393, 62.326)	127.24 (14.885, 274.681)	3.187 (1.554, 5.916)
Deaths	Netherlands	Ischemic stroke	High body-mass index	Number	All ages	Both	356.88 (48.802, 755.862)	379.752 (54.771, 812.463)	0.064 (-0.132, 0.297)
Deaths	New Zealand	Ischemic stroke	High body-mass index	Number	All ages	Both	81.09 (11.612, 164.603)	99.869 (13.782, 216.754)	0.232 (-0.042, 0.478)
Deaths	Nicaragua	Ischemic stroke	High body-mass index	Number	All ages	Both	20.529 (3.006, 40.611)	55.102 (8.7, 112.32)	1.684 (1.087, 2.49)
Deaths	Niger	Ischemic stroke	High body-mass index	Number	All ages	Both	18.227 (1.897, 41.943)	70.174 (7.749, 159.854)	2.85 (1.685, 4.892)
Deaths	Nigeria	Ischemic stroke	High body-mass index	Number	All ages	Both	629.179 (79.867, 1335.439)	1970.346 (272.947, 3897.137)	2.132 (1.161, 3.92)
Deaths	Niue	Ischemic stroke	High body-mass index	Number	All ages	Both	0.065 (0.009, 0.139)	0.075 (0.011, 0.152)	0.146 (-0.147, 0.515)
Deaths	North Macedonia	Ischemic stroke	High body-mass index	Number	All ages	Both	179.211 (26.435, 355.251)	357.554 (53.07, 752.882)	0.995 (0.536, 1.546)
Deaths	Northern Mariana Islands	Ischemic stroke	High body-mass index	Number	All ages	Both	0.397 (0.063, 0.775)	1.128 (0.179, 2.197)	1.843 (1.073, 2.824)
Deaths	Norway	Ischemic stroke	High body-mass index	Number	All ages	Both	154.544 (21.659, 319.519)	70.683 (9.646, 148.337)	-0.543 (-0.62, -0.456)
Deaths	Oman	Ischemic stroke	High body-mass index	Number	All ages	Both	21.581 (2.917, 43.786)	81.303 (13.821, 158.767)	2.767 (1.601, 4.682)
Deaths	Pakistan	Ischemic stroke	High body-mass index	Number	All ages	Both	320.411 (37.671, 696.741)	1731.245 (234.878, 3469.859)	4.403 (2.965, 6.598)
Deaths	Palau	Ischemic stroke	High body-mass index	Number	All ages	Both	0.379 (0.058, 0.744)	0.89 (0.138, 1.789)	1.345 (0.738, 2.287)
Deaths	Palestine	Ischemic stroke	High body-mass index	Number	All ages	Both	65.434 (9.486, 140.67)	158.341 (26.374, 308.074)	1.42 (0.882, 2.266)
Deaths	Panama	Ischemic stroke	High body-mass index	Number	All ages	Both	29.63 (4.217, 63)	87.664 (13.514, 179.94)	1.959 (1.271, 2.712)
Deaths	Papua New Guinea	Ischemic stroke	High body-mass index	Number	All ages	Both	14.184 (1.787, 32.36)	46.119 (5.763, 101.535)	2.251 (1.188, 3.986)
Deaths	Paraguay	Ischemic stroke	High body-mass index	Number	All ages	Both	46.574 (6.768, 95.194)	131.171 (18.393, 276.031)	1.816 (1.103, 2.702)
Deaths	Peru	Ischemic stroke	High body-mass index	Number	All ages	Both	99.818 (14.762, 218.547)	270.892 (39.639, 557.043)	1.714 (0.943, 2.653)
Deaths	Philippines	Ischemic stroke	High body-mass index	Number	All ages	Both	166.445 (21.386, 326.569)	965.215 (126.243, 1911.889)	4.799 (3.665, 6.415)
Deaths	Poland	Ischemic stroke	High body-mass index	Number	All ages	Both	2916.463 (427.778, 5838.816)	2347.914 (359.533, 5081.114)	-0.195 (-0.3, -0.07)
Deaths	Portugal	Ischemic stroke	High body-mass index	Number	All ages	Both	694.56 (92.297, 1436.123)	456.687 (60.638, 990.97)	-0.342 (-0.487, -0.181)
Deaths	Puerto Rico	Ischemic stroke	High body-mass index	Number	All ages	Both	52.072 (7.64, 106.891)	61.657 (9.513, 130.699)	0.184 (-0.078, 0.447)
Deaths	Qatar	Ischemic stroke	High body-mass index	Number	All ages	Both	3.294 (0.524, 6.92)	16.835 (2.898, 33.048)	4.111 (2.726, 6.365)
Deaths	Republic of Korea	Ischemic stroke	High body-mass index	Number	All ages	Both	319.041 (43.785, 674.224)	527.922 (66.666, 1122.149)	0.655 (0.05, 1.512)
Deaths	Republic of Moldova	Ischemic stroke	High body-mass index	Number	All ages	Both	180.434 (27.139, 361.536)	305.289 (44.281, 613.395)	0.692 (0.4, 1.047)
Deaths	Romania	Ischemic stroke	High body-mass index	Number	All ages	Both	1914.827 (273.538, 3832.239)	2509.504 (346.007, 5225.894)	0.311 (0.083, 0.599)
Deaths	Russian Federation	Ischemic stroke	High body-mass index	Number	All ages	Both	17223.223 (2523.234, 34122.885)	19327.413 (2815.325, 39602.469)	0.122 (-0.059, 0.28)
Deaths	Rwanda	Ischemic stroke	High body-mass index	Number	All ages	Both	21.006 (2.661, 42.19)	41.079 (5.491, 88.208)	0.956 (0.214, 2.09)
Deaths	Saint Kitts and Nevis	Ischemic stroke	High body-mass index	Number	All ages	Both	1.896 (0.251, 3.866)	2.571 (0.388, 5.178)	0.356 (0.082, 0.724)
Deaths	Saint Lucia	Ischemic stroke	High body-mass index	Number	All ages	Both	2.507 (0.366, 5.023)	5.542 (0.787, 11.503)	1.21 (0.693, 1.839)
Deaths	Saint Vincent and the Grenadines	Ischemic stroke	High body-mass index	Number	All ages	Both	1.23 (0.164, 2.467)	2.668 (0.395, 5.3)	1.17 (0.71, 1.771)
Deaths	Samoa	Ischemic stroke	High body-mass index	Number	All ages	Both	2.291 (0.365, 4.582)	4.535 (0.694, 8.726)	0.979 (0.474, 1.699)
Deaths	San Marino	Ischemic stroke	High body-mass index	Number	All ages	Both	0.796 (0.114, 1.736)	0.882 (0.117, 2.111)	0.107 (-0.248, 0.546)
Deaths	Sao Tome and Principe	Ischemic stroke	High body-mass index	Number	All ages	Both	1.112 (0.148, 2.315)	3.614 (0.507, 7.01)	2.249 (1.4, 3.432)
Deaths	Saudi Arabia	Ischemic stroke	High body-mass index	Number	All ages	Both	306.868 (43.99, 621.229)	1277.46 (224.463, 2468.199)	3.163 (1.982, 5.336)
Deaths	Senegal	Ischemic stroke	High body-mass index	Number	All ages	Both	53.775 (7.035, 104.001)	180.467 (24.918, 357.115)	2.356 (1.416, 3.537)
Deaths	Serbia	Ischemic stroke	High body-mass index	Number	All ages	Both	937.651 (144.771, 1956.456)	1626.231 (238.278, 3340.593)	0.734 (0.316, 1.198)
Deaths	Seychelles	Ischemic stroke	High body-mass index	Number	All ages	Both	1.018 (0.141, 1.961)	2.599 (0.39, 5.012)	1.554 (1.022, 2.198)
Deaths	Sierra Leone	Ischemic stroke	High body-mass index	Number	All ages	Both	26.341 (3.237, 52.216)	81.743 (10.311, 167.12)	2.103 (1.304, 3.44)
Deaths	Singapore	Ischemic stroke	High body-mass index	Number	All ages	Both	15.089 (1.996, 29.84)	17.978 (2.318, 36.477)	0.191 (-0.135, 0.686)
Deaths	Slovakia	Ischemic stroke	High body-mass index	Number	All ages	Both	407.853 (57.939, 835.687)	379.834 (59.72, 777.314)	-0.069 (-0.264, 0.173)
Deaths	Slovenia	Ischemic stroke	High body-mass index	Number	All ages	Both	131.904 (18.979, 270.157)	94.835 (13.878, 209.444)	-0.281 (-0.439, -0.146)
Deaths	Solomon Islands	Ischemic stroke	High body-mass index	Number	All ages	Both	1.728 (0.222, 3.854)	6.354 (0.841, 14.189)	2.677 (1.578, 4.544)
Deaths	Somalia	Ischemic stroke	High body-mass index	Number	All ages	Both	10.622 (1.053, 24.268)	35.837 (3.594, 84.075)	2.374 (1.347, 4.038)
Deaths	South Africa	Ischemic stroke	High body-mass index	Number	All ages	Both	426.867 (61.361, 850.04)	1731.349 (255.055, 3439.067)	3.056 (2.447, 3.992)
Deaths	South Sudan	Ischemic stroke	High body-mass index	Number	All ages	Both	7.519 (0.857, 15.908)	13.945 (1.622, 29.182)	0.855 (0.24, 1.948)
Deaths	Spain	Ischemic stroke	High body-mass index	Number	All ages	Both	1663.915 (235.095, 3454.53)	1138.022 (159.007, 2548.734)	-0.316 (-0.439, -0.197)
Deaths	Sri Lanka	Ischemic stroke	High body-mass index	Number	All ages	Both	101.383 (13.463, 203.642)	420.162 (59.787, 932.783)	3.144 (1.635, 5.174)
Deaths	Sudan	Ischemic stroke	High body-mass index	Number	All ages	Both	395.057 (52.724, 843.923)	1123.932 (167.082, 2307.791)	1.845 (1.001, 3.004)
Deaths	Suriname	Ischemic stroke	High body-mass index	Number	All ages	Both	3.463 (0.486, 6.836)	11.428 (1.657, 23.671)	2.3 (1.375, 3.536)
Deaths	Sweden	Ischemic stroke	High body-mass index	Number	All ages	Both	300.598 (40.913, 652.39)	194.111 (26.689, 429.125)	-0.354 (-0.473, -0.217)
Deaths	Switzerland	Ischemic stroke	High body-mass index	Number	All ages	Both	181.184 (24.753, 394.76)	118.488 (15.417, 259.834)	-0.346 (-0.492, -0.19)
Deaths	Syrian Arab Republic	Ischemic stroke	High body-mass index	Number	All ages	Both	232.119 (35.846, 445.251)	795.679 (128.62, 1609.312)	2.428 (1.416, 3.947)
Deaths	Taiwan (Province of China)	Ischemic stroke	High body-mass index	Number	All ages	Both	163.854 (22.549, 322.945)	255.023 (36.271, 526.358)	0.556 (0.164, 0.992)
Deaths	Tajikistan	Ischemic stroke	High body-mass index	Number	All ages	Both	118.408 (16.37, 236.686)	216.443 (31.297, 436.806)	0.828 (0.34, 1.511)
Deaths	Thailand	Ischemic stroke	High body-mass index	Number	All ages	Both	186.557 (23.966, 365.817)	1000.097 (146.84, 2019.948)	4.361 (2.67, 6.776)
Deaths	Timor-Leste	Ischemic stroke	High body-mass index	Number	All ages	Both	0.441 (0.047, 0.949)	3.717 (0.454, 7.654)	7.435 (3.733, 14.151)
Deaths	Togo	Ischemic stroke	High body-mass index	Number	All ages	Both	16.539 (2.065, 33.958)	93.27 (12.108, 185.657)	4.639 (3.043, 7.144)
Deaths	Tokelau	Ischemic stroke	High body-mass index	Number	All ages	Both	0.039 (0.006, 0.085)	0.049 (0.008, 0.102)	0.235 (-0.093, 0.732)
Deaths	Tonga	Ischemic stroke	High body-mass index	Number	All ages	Both	0.99 (0.15, 1.903)	2.041 (0.334, 4.058)	1.063 (0.491, 1.832)
Deaths	Trinidad and Tobago	Ischemic stroke	High body-mass index	Number	All ages	Both	26.723 (4.081, 50.893)	50.72 (7.186, 99.368)	0.898 (0.414, 1.43)
Deaths	Tunisia	Ischemic stroke	High body-mass index	Number	All ages	Both	117.938 (17.104, 243.673)	515.939 (79.816, 1105.562)	3.375 (2.063, 5.294)
Deaths	Turkey	Ischemic stroke	High body-mass index	Number	All ages	Both	1350.554 (184.644, 2705.485)	3244.288 (500.336, 6778.928)	1.402 (0.809, 2.242)
Deaths	Turkmenistan	Ischemic stroke	High body-mass index	Number	All ages	Both	87.455 (13.542, 180.115)	249.796 (36.368, 525.702)	1.856 (1.177, 2.694)
Deaths	Tuvalu	Ischemic stroke	High body-mass index	Number	All ages	Both	0.205 (0.029, 0.418)	0.395 (0.059, 0.782)	0.926 (0.459, 1.504)
Deaths	Uganda	Ischemic stroke	High body-mass index	Number	All ages	Both	26.5 (3.306, 56.816)	89.009 (12.289, 188.499)	2.359 (1.267, 3.857)
Deaths	Ukraine	Ischemic stroke	High body-mass index	Number	All ages	Both	6132.135 (878.69, 12175.701)	5111.42 (795.478, 10190.333)	-0.166 (-0.367, 0.087)
Deaths	United Arab Emirates	Ischemic stroke	High body-mass index	Number	All ages	Both	17.897 (2.496, 35.629)	112.555 (18.391, 215.249)	5.289 (3.772, 8.085)
Deaths	United Kingdom	Ischemic stroke	High body-mass index	Number	All ages	Both	2886.41 (416.226, 5982.615)	1427.803 (199.461, 3133.692)	-0.505 (-0.575, -0.449)
Deaths	United Republic of Tanzania	Ischemic stroke	High body-mass index	Number	All ages	Both	65.251 (7.661, 132.053)	395.257 (51.519, 850.657)	5.057 (2.961, 8.267)
Deaths	United States of America	Ischemic stroke	High body-mass index	Number	All ages	Both	5131.463 (731.535, 10564.806)	8371.059 (1192.436, 17709.748)	0.631 (0.405, 0.811)
Deaths	United States Virgin Islands	Ischemic stroke	High body-mass index	Number	All ages	Both	1.827 (0.291, 3.69)	2.571 (0.396, 5.396)	0.407 (0.029, 0.877)
Deaths	Uruguay	Ischemic stroke	High body-mass index	Number	All ages	Both	138.728 (20.074, 283.479)	135.228 (19.757, 291.444)	-0.025 (-0.187, 0.164)
Deaths	Uzbekistan	Ischemic stroke	High body-mass index	Number	All ages	Both	440.822 (64.724, 864.171)	1060.836 (164.807, 2180.248)	1.406 (0.98, 1.945)
Deaths	Vanuatu	Ischemic stroke	High body-mass index	Number	All ages	Both	0.97 (0.128, 2.205)	3.49 (0.47, 7.512)	2.598 (1.523, 4.083)
Deaths	Venezuela (Bolivarian Republic of)	Ischemic stroke	High body-mass index	Number	All ages	Both	146.293 (21.896, 298.932)	554.418 (81.543, 1158.019)	2.79 (1.735, 4.107)
Deaths	Viet Nam	Ischemic stroke	High body-mass index	Number	All ages	Both	112.433 (13.322, 228.551)	791.681 (92.937, 1577.59)	6.041 (3.41, 9.841)
Deaths	Yemen	Ischemic stroke	High body-mass index	Number	All ages	Both	117.868 (15.345, 243.03)	694.524 (92.207, 1381.216)	4.892 (3.085, 7.746)
Deaths	Zambia	Ischemic stroke	High body-mass index	Number	All ages	Both	15.804 (1.85, 33.918)	111.959 (14.989, 233.679)	6.084 (3.704, 9.913)
Deaths	Zimbabwe	Ischemic stroke	High body-mass index	Number	All ages	Both	30.524 (4.499, 59.499)	187.585 (25.928, 373.686)	5.145 (3.291, 8.414)
